# Supplementary material
Source: publisher site journal article supplement (https://www.spandidos-publications.com/5540/downloadSupplementary)
Supplement: Supplementary file 1 [file downloadSupplementary]

## Sheet: Sheet1
Table SVI. The target miRNAs of long non-coding RNAs
miRNA	gene	Tot Score	Tot Energy	Max Score	Max Energy	Len_miRNA	Len_gene	Positions
mmu-miR-1938	NONMMUT141389.1	200	-49.01	200	-49.01	22	1366	25
mmu-miR-5126	NONMMUT052500.2	327	-85.89	176	-45.98	22	2570	628 684
mmu-miR-7081-5p	NONMMUT052500.2	492	-109.57	195	-43.76	26	2570	686 620 300
mmu-miR-3547-5p	NONMMUT064235.2	153	-43.38	153	-43.38	25	3151	1920
mmu-miR-709	NONMMUT059456.2	181	-42.08	181	-42.08	19	994	906
mmu-miR-7032-3p	NONMMUT059456.2	171	-41.56	171	-41.56	22	994	27
mmu-miR-5122	NONMMUT052500.2	146	-40.61	146	-40.61	20	2570	516
mmu-miR-6538	NONMMUT052500.2	471	-113.11	164	-40.3	19	2570	498 791 815
mmu-miR-149-3p	NONMMUT049192.2	297	-64.05	157	-40	22	1011	404 258
mmu-miR-1934-5p	NONMMUT064235.2	298	-65.72	151	-39.66	23	3151	999 2369
mmu-miR-705	NONMMUT052500.2	304	-57.21	162	-38.75	20	2570	46 108
mmu-miR-6982-5p	NONMMUT059456.2	296	-66.27	152	-38.59	25	994	120 767
mmu-miR-5621-5p	NONMMUT049192.2	292	-64.14	151	-38.34	23	1011	724 55
mmu-miR-7648-3p	NONMMUT049192.2	141	-38.22	141	-38.22	21	1011	11
mmu-miR-8109	NONMMUT059456.2	301	-68.66	159	-37.86	21	994	141 102
mmu-miR-7047-5p	NONMMUT049192.2	144	-37.63	144	-37.63	23	1011	401
mmu-miR-935	NONMMUT049192.2	162	-37.39	162	-37.39	24	1011	226
mmu-miR-7686-5p	NONMMUT052500.2	454	-80.43	159	-37.15	25	2570	2309 1506 1387
mmu-miR-7045-5p	NONMMUT052500.2	295	-54.15	154	-37.09	21	2570	630 837
mmu-miR-6931-5p	NONMMUT049192.2	145	-36.96	145	-36.96	21	1011	25
mmu-miR-149-3p	NONMMUT052500.2	435	-92.94	152	-36.78	22	2570	671 623 35
mmu-miR-3077-5p	NONMMUT059456.2	163	-36.63	163	-36.63	25	994	92
mmu-miR-7071-5p	NONMMUT049192.2	305	-59.6	163	-36.58	23	1011	259 330
mmu-miR-3960	NONMMUT141389.1	298	-67.83	152	-36.57	20	1366	130 109
mmu-miR-3960	NONMMUT049192.2	288	-68.05	147	-36.56	20	1011	545 124
mmu-miR-5126	NONMMUT059456.2	298	-71.01	157	-36.49	22	994	109 88
mmu-miR-6240	NONMMUT141389.1	141	-36.4	141	-36.4	26	1366	615
mmu-miR-1982-5p	NONMMUT141389.1	170	-36.26	170	-36.26	20	1366	668
mmu-miR-365-1-5p	NONMMUT141389.1	296	-52.46	148	-36.26	23	1366	21 928
mmu-miR-1249-5p	NONMMUT049192.2	158	-36.25	158	-36.25	25	1011	32
mmu-miR-7046-5p	NONMMUT064235.2	292	-60.34	148	-36.12	24	3151	1111 1922
mmu-miR-7024-3p	NONMMUT049192.2	152	-36.08	152	-36.08	23	1011	184
mmu-miR-1901	NONMMUT141389.1	149	-36.03	149	-36.03	22	1366	365
mmu-miR-3102-5p	NONMMUT059456.2	142	-36.02	142	-36.02	22	994	90
mmu-miR-328-5p	NONMMUT141389.1	151	-35.92	151	-35.92	22	1366	577
mmu-miR-1946a	NONMMUT046460.2	159	-35.9	159	-35.9	27	2478	923
mmu-miR-6982-5p	NONMMUT046460.2	293	-53.81	147	-35.89	25	2478	342 875
mmu-miR-6236	NONMMUT049192.2	316	-66.01	160	-35.83	19	1011	246 287
mmu-miR-6975-5p	NONMMUT052500.2	296	-55.73	156	-35.78	23	2570	674 437
mmu-miR-6923-5p	NONMMUT049192.2	433	-96.39	145	-35.73	24	1011	393 484 42
mmu-miR-1249-5p	NONMMUT052500.2	312	-59.22	157	-35.65	25	2570	31 665
mmu-miR-8102	NONMMUT059456.2	168	-35.62	168	-35.62	22	994	465
mmu-miR-7117-5p	NONMMUT064235.2	303	-69.15	161	-35.47	22	3151	1913 185
mmu-miR-6968-5p	NONMMUT059456.2	146	-35.41	146	-35.41	22	994	113
mmu-miR-6914-5p	NONMMUT064235.2	596	-118.88	173	-35.36	24	3151	1413 1871 2904 2226
mmu-miR-7044-5p	NONMMUT141389.1	141	-35.34	141	-35.34	19	1366	146
mmu-miR-3960	NONMMUT059456.2	145	-35.3	145	-35.3	20	994	118
mmu-miR-7008-5p	NONMMUT064235.2	309	-54.84	162	-35.24	24	3151	137 2541
mmu-miR-7019-5p	NONMMUT049192.2	287	-55.14	146	-35.07	23	1011	624 260
mmu-miR-6927-5p	NONMMUT141389.1	154	-35.03	154	-35.03	22	1366	86
mmu-miR-320-5p	NONMMUT064235.2	748	-121.02	160	-35.03	22	3151	682 852 2793 703 613
mmu-miR-6919-3p	NONMMUT064235.2	465	-83.44	172	-34.89	21	3151	852 2799 2368
mmu-miR-3104-5p	NONMMUT059456.2	167	-34.87	167	-34.87	25	994	902
mmu-miR-6961-3p	NONMMUT064235.2	726	-108.3	152	-34.75	22	3151	853 779 1614 2795 2787
mmu-miR-615-5p	NONMMUT052500.2	141	-34.73	141	-34.73	22	2570	741
mmu-miR-6923-5p	NONMMUT052500.2	441	-99.95	153	-34.7	24	2570	1597 687 849
mmu-miR-7658-5p	NONMMUT052500.2	302	-54.42	155	-34.64	20	2570	364 1590
mmu-miR-7687-3p	NONMMUT141389.1	140	-34.47	140	-34.47	21	1366	280
mmu-miR-3960	NONMMUT052500.2	159	-34.46	159	-34.46	20	2570	634
mmu-miR-7006-5p	NONMMUT141389.1	298	-60.83	149	-34.39	25	1366	84 134
mmu-miR-328-5p	NONMMUT052500.2	146	-34.33	146	-34.33	22	2570	1598
mmu-miR-8109	NONMMUT049192.2	148	-34.28	148	-34.28	21	1011	20
mmu-miR-12186-3p	NONMMUT049192.2	147	-34.24	147	-34.24	21	1011	185
mmu-miR-6945-5p	NONMMUT049192.2	293	-67.32	152	-34.24	22	1011	260 705
mmu-miR-7031-5p	NONMMUT049192.2	296	-58.07	149	-34.06	23	1011	300 532
mmu-miR-7654-3p	NONMMUT141389.1	141	-33.95	141	-33.95	22	1366	48
mmu-miR-3077-3p	NONMMUT052500.2	144	-33.88	144	-33.88	22	2570	893
mmu-miR-7029-5p	NONMMUT052500.2	281	-63.02	141	-33.82	23	2570	884 600
mmu-miR-7044-5p	NONMMUT046460.2	330	-65.72	173	-33.73	19	2478	316 301
mmu-miR-7069-5p	NONMMUT049192.2	147	-33.7	147	-33.7	23	1011	538
mmu-miR-5133	NONMMUT049192.2	140	-33.67	140	-33.67	21	1011	482
mmu-miR-7071-5p	NONMMUT052500.2	297	-65.54	156	-33.64	23	2570	604 734
mmu-miR-6923-5p	NONMMUT141389.1	152	-33.56	152	-33.56	24	1366	574
mmu-miR-1900	NONMMUT049192.2	163	-33.55	163	-33.55	22	1011	172
mmu-miR-466i-5p	NONMMUT046460.2	186	-33.54	186	-33.54	20	2478	287
mmu-miR-5621-5p	NONMMUT064235.2	304	-61.33	155	-33.53	23	3151	2561 371
mmu-miR-7216-5p	NONMMUT049192.2	164	-33.52	164	-33.52	24	1011	318
mmu-miR-5627-5p	NONMMUT052500.2	297	-54.61	157	-33.5	22	2570	618 1395
mmu-miR-714	NONMMUT049192.2	175	-33.49	175	-33.49	21	1011	398
mmu-miR-7012-3p	NONMMUT064235.2	291	-57.15	151	-33.48	22	3151	644 2882
mmu-miR-1963	NONMMUT141389.1	175	-33.38	175	-33.38	23	1366	691
mmu-miR-7044-5p	NONMMUT052500.2	147	-33.34	147	-33.34	19	2570	333
mmu-miR-6963-3p	NONMMUT141389.1	147	-33.33	147	-33.33	23	1366	277
mmu-miR-7085-5p	NONMMUT064235.2	147	-33.32	147	-33.32	22	3151	144
mmu-miR-7015-5p	NONMMUT052500.2	168	-33.06	168	-33.06	23	2570	826
mmu-miR-8109	NONMMUT052500.2	141	-33.04	141	-33.04	21	2570	751
mmu-miR-1893	NONMMUT049192.2	160	-33	160	-33	22	1011	116
mmu-miR-7069-5p	NONMMUT064235.2	454	-86.38	159	-32.98	23	3151	1919 2564 2821
mmu-miR-6366	NONMMUT059456.2	154	-32.97	154	-32.97	22	994	180
mmu-miR-3090-5p	NONMMUT059456.2	148	-32.94	148	-32.94	21	994	216
mmu-miR-7687-5p	NONMMUT059456.2	158	-32.94	158	-32.94	25	994	75
mmu-miR-6978-3p	NONMMUT064235.2	146	-32.89	146	-32.89	23	3151	705
mmu-miR-9768-5p	NONMMUT064235.2	301	-61.11	160	-32.89	23	3151	1983 2896
mmu-miR-7087-3p	NONMMUT052500.2	141	-32.86	141	-32.86	22	2570	564
mmu-miR-214-3p	NONMMUT052500.2	152	-32.85	152	-32.85	22	2570	1504
mmu-miR-6937-5p	NONMMUT052500.2	449	-74.12	159	-32.83	24	2570	1335 814 2419
mmu-miR-3083b-5p	NONMMUT052500.2	148	-32.81	148	-32.81	22	2570	612
mmu-miR-7046-5p	NONMMUT052500.2	147	-32.76	147	-32.76	24	2570	618
mmu-miR-667-5p	NONMMUT052500.2	285	-52.52	143	-32.76	25	2570	1120 375
mmu-miR-6971-5p	NONMMUT049192.2	155	-32.65	155	-32.65	20	1011	407
mmu-miR-5621-5p	NONMMUT059456.2	158	-32.64	158	-32.64	23	994	220
mmu-miR-5126	NONMMUT049192.2	148	-32.61	148	-32.61	22	1011	125
mmu-miR-676-3p	NONMMUT049192.2	151	-32.6	151	-32.6	21	1011	813
mmu-miR-7023-3p	NONMMUT141389.1	155	-32.58	155	-32.58	22	1366	414
mmu-miR-706	NONMMUT059456.2	168	-32.58	168	-32.58	22	994	250
mmu-miR-5120	NONMMUT049192.2	145	-32.55	145	-32.55	23	1011	22
mmu-miR-7071-5p	NONMMUT141389.1	153	-32.51	153	-32.51	23	1366	70
mmu-miR-12178-5p	NONMMUT052500.2	140	-32.5	140	-32.5	24	2570	731
mmu-miR-6910-5p	NONMMUT064235.2	141	-32.5	141	-32.5	23	3151	188
mmu-miR-6982-5p	NONMMUT064235.2	296	-53.17	156	-32.5	25	3151	2983 2562
mmu-miR-7687-5p	NONMMUT052500.2	433	-88.67	153	-32.49	25	2570	624 323 1549
mmu-miR-7038-3p	NONMMUT064235.2	723	-117.52	151	-32.44	22	3151	1268 692 1619 2089 2028
mmu-miR-7002-5p	NONMMUT141389.1	141	-32.27	141	-32.27	21	1366	125
mmu-miR-1892	NONMMUT059456.2	303	-57.73	160	-32.27	22	994	749 614
mmu-miR-1195	NONMMUT059456.2	281	-56.96	141	-32.26	23	994	458 873
mmu-miR-671-3p	NONMMUT052500.2	142	-32.22	142	-32.22	21	2570	507
mmu-miR-6926-5p	NONMMUT049192.2	145	-32.21	145	-32.21	22	1011	407
mmu-miR-5131	NONMMUT059456.2	142	-32.18	142	-32.18	23	994	29
mmu-miR-3569-5p	NONMMUT059456.2	304	-53.27	164	-32.15	21	994	127 600
mmu-miR-6990-5p	NONMMUT141389.1	141	-32.14	141	-32.14	21	1366	722
mmu-miR-673-3p	NONMMUT064235.2	156	-32.1	156	-32.1	23	3151	2889
mmu-miR-3620-5p	NONMMUT064235.2	144	-32.09	144	-32.09	22	3151	1940
mmu-miR-7045-5p	NONMMUT064235.2	284	-63.35	144	-32.08	21	3151	1692 1946
mmu-miR-7654-5p	NONMMUT049192.2	141	-32.01	141	-32.01	22	1011	252
mmu-miR-3085-5p	NONMMUT064235.2	280	-54.87	140	-31.99	25	3151	1817 2125
mmu-miR-6981-5p	NONMMUT141389.1	284	-51.36	144	-31.96	26	1366	659 1323
mmu-miR-6914-5p	NONMMUT141389.1	163	-31.95	163	-31.95	24	1366	34
mmu-miR-6954-5p	NONMMUT064235.2	436	-79.69	153	-31.95	22	3151	1412 139 200
mmu-miR-760-3p	NONMMUT141389.1	453	-78.3	162	-31.95	20	1366	567 1211 127
mmu-miR-2139	NONMMUT141389.1	298	-61.76	156	-31.94	24	1366	646 317
mmu-miR-511-5p	NONMMUT064235.2	458	-67.97	159	-31.93	21	3151	80 2471 686
mmu-miR-7047-5p	NONMMUT052500.2	293	-59.86	147	-31.9	23	2570	668 686
mmu-miR-6897-5p	NONMMUT064235.2	296	-63.57	149	-31.87	23	3151	144 189
mmu-miR-12178-5p	NONMMUT064235.2	287	-52.29	144	-31.85	24	3151	24 2915
mmu-miR-2137	NONMMUT049192.2	155	-31.84	155	-31.84	21	1011	72
mmu-miR-3104-5p	NONMMUT052500.2	143	-31.83	143	-31.83	25	2570	395
mmu-miR-8101	NONMMUT141389.1	147	-31.77	147	-31.77	22	1366	488
mmu-miR-6954-5p	NONMMUT052500.2	294	-57.49	154	-31.77	22	2570	340 1285
mmu-miR-5131	NONMMUT049192.2	151	-31.75	151	-31.75	23	1011	78
mmu-miR-7008-5p	NONMMUT049192.2	142	-31.7	142	-31.7	24	1011	489
mmu-miR-1247-5p	NONMMUT059456.2	144	-31.7	144	-31.7	22	994	1
mmu-miR-1943-5p	NONMMUT049192.2	283	-57.5	143	-31.7	23	1011	724 402
mmu-miR-106b-3p	NONMMUT052500.2	142	-31.68	142	-31.68	22	2570	842
mmu-miR-7662-3p	NONMMUT059456.2	153	-31.66	153	-31.66	24	994	938
mmu-miR-7003-5p	NONMMUT141389.1	169	-31.64	169	-31.64	21	1366	516
mmu-miR-6982-5p	NONMMUT049192.2	296	-58.88	153	-31.64	25	1011	253 401
mmu-miR-7023-5p	NONMMUT049192.2	155	-31.63	155	-31.63	23	1011	403
mmu-miR-7019-5p	NONMMUT141389.1	314	-56.98	165	-31.62	23	1366	561 667
mmu-miR-7075-5p	NONMMUT046460.2	308	-53.84	165	-31.61	21	2478	584 342
mmu-miR-7032-5p	NONMMUT141389.1	146	-31.6	146	-31.6	26	1366	707
mmu-miR-298-5p	NONMMUT059456.2	429	-80.4	145	-31.54	23	994	897 599 272
mmu-miR-3474	NONMMUT049192.2	158	-31.53	158	-31.53	22	1011	260
mmu-miR-1982-5p	NONMMUT052500.2	149	-31.52	149	-31.52	20	2570	49
mmu-miR-3077-3p	NONMMUT046460.2	173	-31.49	173	-31.49	22	2478	2221
mmu-miR-8103	NONMMUT064235.2	451	-78.66	157	-31.47	21	3151	2368 2699 600
mmu-miR-1946a	NONMMUT052500.2	160	-31.45	160	-31.45	27	2570	800
mmu-miR-3076-5p	NONMMUT141389.1	151	-31.42	151	-31.42	24	1366	934
mmu-miR-7080-5p	NONMMUT049192.2	146	-31.36	146	-31.36	23	1011	476
mmu-miR-615-5p	NONMMUT059456.2	310	-57.56	163	-31.36	22	994	47 160
mmu-miR-330-5p	NONMMUT064235.2	164	-31.34	164	-31.34	22	3151	1263
mmu-miR-1901	NONMMUT052500.2	157	-31.33	157	-31.33	22	2570	451
mmu-miR-7115-5p	NONMMUT141389.1	302	-54.94	161	-31.31	24	1366	136 350
mmu-miR-7032-3p	NONMMUT141389.1	143	-31.3	143	-31.3	22	1366	282
mmu-miR-7015-3p	NONMMUT064235.2	459	-73.68	158	-31.3	21	3151	678 2451 1025
mmu-miR-7020-5p	NONMMUT064235.2	299	-61.59	153	-31.29	24	3151	2897 1922
mmu-miR-2139	NONMMUT049192.2	155	-31.28	155	-31.28	24	1011	609
mmu-miR-6944-5p	NONMMUT049192.2	302	-45.82	162	-31.28	23	1011	488 299
mmu-miR-3092-5p	NONMMUT059456.2	156	-31.23	156	-31.23	22	994	599
mmu-miR-351-5p	NONMMUT049192.2	158	-31.23	158	-31.23	24	1011	303
mmu-miR-6953-5p	NONMMUT059456.2	290	-58.45	149	-31.19	26	994	119 897
mmu-miR-6931-5p	NONMMUT052500.2	733	-138.04	153	-31.14	21	2570	42 324 117 620 2345
mmu-miR-6973a-5p	NONMMUT052500.2	147	-31.13	147	-31.13	22	2570	683
mmu-miR-7658-5p	NONMMUT141389.1	152	-31.11	152	-31.11	20	1366	528
mmu-miR-6973a-5p	NONMMUT141389.1	151	-31.07	151	-31.07	22	1366	145
mmu-miR-92b-5p	NONMMUT141389.1	152	-31.04	152	-31.04	24	1366	689
mmu-miR-6965-5p	NONMMUT052500.2	289	-55.51	149	-31.02	24	2570	1551 206
mmu-miR-99a-3p	NONMMUT049192.2	155	-30.97	155	-30.97	21	1011	139
mmu-miR-7047-3p	NONMMUT141389.1	140	-30.95	140	-30.95	23	1366	319
mmu-miR-1951	NONMMUT049192.2	140	-30.91	140	-30.91	22	1011	109
mmu-miR-877-3p	NONMMUT064235.2	308	-48.53	159	-30.9	22	3151	2801 780
mmu-miR-7071-5p	NONMMUT059456.2	151	-30.82	151	-30.82	23	994	563
mmu-miR-7058-3p	NONMMUT052500.2	171	-30.81	171	-30.81	22	2570	1710
mmu-miR-762	NONMMUT064235.2	151	-30.8	151	-30.8	22	3151	1935
mmu-miR-7017-5p	NONMMUT052500.2	443	-72.56	150	-30.8	24	2570	1946 699 1485
mmu-miR-598-5p	NONMMUT049192.2	143	-30.74	143	-30.74	23	1011	659
mmu-miR-5126	NONMMUT141389.1	151	-30.74	151	-30.74	22	1366	191
mmu-miR-3077-5p	NONMMUT049192.2	171	-30.68	171	-30.68	25	1011	412
mmu-miR-339-3p	NONMMUT049192.2	289	-53.29	147	-30.67	23	1011	43 153
mmu-miR-3085-3p	NONMMUT052500.2	144	-30.59	144	-30.59	21	2570	573
mmu-miR-7036a-3p	NONMMUT064235.2	441	-82.82	150	-30.58	23	3151	772 2800 653
mmu-miR-6926-5p	NONMMUT059456.2	142	-30.54	142	-30.54	22	994	113
mmu-miR-7654-3p	NONMMUT049192.2	150	-30.49	150	-30.49	22	1011	326
mmu-miR-3080-3p	NONMMUT052500.2	143	-30.46	143	-30.46	22	2570	784
mmu-miR-3544-3p	NONMMUT052500.2	143	-30.45	143	-30.45	22	2570	889
mmu-miR-12187-5p	NONMMUT052500.2	299	-44.76	158	-30.45	22	2570	2067 1054
mmu-miR-328-5p	NONMMUT049192.2	151	-30.44	151	-30.44	22	1011	65
mmu-miR-7056-5p	NONMMUT064235.2	452	-75.83	159	-30.4	22	3151	377 1687 2560
mmu-miR-705	NONMMUT049192.2	141	-30.36	141	-30.36	20	1011	332
mmu-miR-7082-5p	NONMMUT049192.2	154	-30.36	154	-30.36	21	1011	126
mmu-miR-127-5p	NONMMUT052500.2	167	-30.35	167	-30.35	22	2570	1358
mmu-miR-208a-5p	NONMMUT064235.2	444	-61.18	156	-30.34	22	3151	1388 1956 2630
mmu-miR-6909-3p	NONMMUT064235.2	148	-30.33	148	-30.33	22	3151	714
mmu-miR-1982-5p	NONMMUT064235.2	146	-30.27	146	-30.27	20	3151	2916
mmu-miR-6985-5p	NONMMUT059456.2	173	-30.25	173	-30.25	22	994	742
mmu-miR-92a-2-5p	NONMMUT052500.2	451	-75.35	156	-30.25	22	2570	38 322 627
mmu-miR-6945-5p	NONMMUT141389.1	424	-80.5	142	-30.23	22	1366	562 72 668
mmu-miR-6361	NONMMUT049192.2	141	-30.22	141	-30.22	23	1011	189
mmu-miR-3104-5p	NONMMUT049192.2	147	-30.12	147	-30.12	25	1011	682
mmu-miR-6922-5p	NONMMUT046460.2	160	-30.11	160	-30.11	23	2478	220
mmu-miR-574-5p	NONMMUT046460.2	149	-30.1	149	-30.1	23	2478	286
mmu-miR-6339	NONMMUT064235.2	472	-73.15	168	-30.08	23	3151	2471 419 2360
mmu-miR-7088-5p	NONMMUT059456.2	294	-52.77	153	-30.07	25	994	524 782
mmu-miR-7020-5p	NONMMUT049192.2	302	-54.64	161	-30.07	24	1011	23 426
mmu-miR-7018-5p	NONMMUT059456.2	290	-55.24	148	-30.06	24	994	571 119
mmu-miR-7681-5p	NONMMUT064235.2	322	-53.57	162	-30.06	20	3151	2367 2700
mmu-miR-6968-5p	NONMMUT049192.2	142	-30.04	142	-30.04	22	1011	326
mmu-miR-6409	NONMMUT141389.1	155	-30	155	-30	23	1366	95
mmu-miR-326-5p	NONMMUT052500.2	146	-29.97	146	-29.97	24	2570	340
mmu-miR-7023-5p	NONMMUT064235.2	149	-29.97	149	-29.97	23	3151	2984
mmu-miR-6971-5p	NONMMUT052500.2	434	-79.21	150	-29.97	20	2570	348 1925 626
mmu-miR-6935-5p	NONMMUT059456.2	151	-29.95	151	-29.95	22	994	463
mmu-miR-23a-5p	NONMMUT052500.2	140	-29.94	140	-29.94	22	2570	495
mmu-miR-7081-5p	NONMMUT059456.2	150	-29.9	150	-29.9	26	994	223
mmu-miR-7020-5p	NONMMUT052500.2	280	-54.75	140	-29.9	24	2570	27 1963
mmu-miR-1946b	NONMMUT059456.2	307	-57.11	157	-29.89	26	994	275 939
mmu-miR-7058-5p	NONMMUT064235.2	157	-29.88	157	-29.88	24	3151	1072
mmu-miR-6407	NONMMUT052500.2	150	-29.86	150	-29.86	23	2570	901
mmu-miR-7034-5p	NONMMUT052500.2	153	-29.83	153	-29.83	21	2570	608
mmu-miR-5110	NONMMUT059456.2	319	-58.18	161	-29.83	25	994	222 903
mmu-miR-3547-5p	NONMMUT049192.2	288	-55.37	145	-29.81	25	1011	526 698
mmu-miR-1188-5p	NONMMUT064235.2	304	-53.43	160	-29.79	21	3151	1110 1944
mmu-miR-5046	NONMMUT049192.2	143	-29.78	143	-29.78	24	1011	169
mmu-miR-1966-5p	NONMMUT049192.2	283	-51.72	142	-29.78	25	1011	693 320
mmu-miR-7220-5p	NONMMUT064235.2	593	-81.15	164	-29.78	22	3151	1581 1597 2971 1726
mmu-miR-666-3p	NONMMUT049192.2	147	-29.76	147	-29.76	22	1011	249
mmu-miR-6968-5p	NONMMUT141389.1	147	-29.73	147	-29.73	22	1366	32
mmu-miR-8104	NONMMUT064235.2	142	-29.72	142	-29.72	22	3151	1920
mmu-miR-1956	NONMMUT141389.1	280	-54.53	140	-29.71	22	1366	587 713
mmu-miR-7005-5p	NONMMUT141389.1	156	-29.63	156	-29.63	22	1366	561
mmu-miR-7081-5p	NONMMUT049192.2	142	-29.62	142	-29.62	26	1011	677
mmu-miR-6958-3p	NONMMUT141389.1	140	-29.6	140	-29.6	23	1366	272
mmu-miR-5106	NONMMUT046460.2	143	-29.6	143	-29.6	23	2478	453
mmu-miR-1188-3p	NONMMUT064235.2	298	-57.2	151	-29.59	25	3151	2887 766
mmu-miR-6936-3p	NONMMUT052500.2	444	-78.85	153	-29.59	21	2570	361 161 733
mmu-miR-6954-5p	NONMMUT059456.2	565	-105.01	143	-29.59	22	994	623 573 122 903
mmu-miR-6943-5p	NONMMUT064235.2	298	-49.92	149	-29.57	20	3151	275 1924
mmu-miR-92a-2-5p	NONMMUT064235.2	147	-29.56	147	-29.56	22	3151	1684
mmu-miR-1247-5p	NONMMUT049192.2	162	-29.56	162	-29.56	22	1011	365
mmu-miR-7118-5p	NONMMUT046460.2	142	-29.55	142	-29.55	22	2478	230
mmu-miR-7016-3p	NONMMUT064235.2	321	-47.9	167	-29.55	22	3151	2365 2079
mmu-miR-7687-5p	NONMMUT049192.2	307	-56.68	155	-29.52	25	1011	67 539
mmu-miR-6938-3p	NONMMUT049192.2	168	-29.49	168	-29.49	22	1011	628
mmu-miR-6361	NONMMUT064235.2	157	-29.48	157	-29.48	23	3151	1823
mmu-miR-6980-5p	NONMMUT052500.2	286	-57.07	144	-29.44	22	2570	36 346
mmu-miR-6409	NONMMUT052500.2	293	-52.13	149	-29.43	23	2570	836 629
mmu-miR-344-5p	NONMMUT052500.2	300	-53.08	154	-29.43	26	2570	1151 1344
mmu-miR-692	NONMMUT064235.2	462	-58.82	170	-29.43	21	3151	2386 728 2253
mmu-miR-3547-5p	NONMMUT046460.2	307	-51.27	154	-29.42	25	2478	218 195
mmu-miR-6979-3p	NONMMUT141389.1	296	-50.26	150	-29.4	21	1366	912 950
mmu-miR-7054-5p	NONMMUT046460.2	762	-112.38	160	-29.4	25	2478	225 206 1701 334 960
mmu-miR-7687-5p	NONMMUT141389.1	150	-29.38	150	-29.38	25	1366	136
mmu-miR-6922-5p	NONMMUT141389.1	152	-29.38	152	-29.38	23	1366	666
mmu-miR-7088-5p	NONMMUT052500.2	151	-29.32	151	-29.32	25	2570	711
mmu-miR-3473d	NONMMUT064235.2	315	-46.48	158	-29.32	24	3151	63 2458
mmu-miR-5132-5p	NONMMUT052500.2	145	-29.3	145	-29.3	21	2570	349
mmu-miR-6963-5p	NONMMUT049192.2	148	-29.22	148	-29.22	24	1011	430
mmu-miR-6958-3p	NONMMUT052500.2	605	-103.43	160	-29.19	23	2570	1523 817 1427 988
mmu-miR-7028-5p	NONMMUT141389.1	140	-29.17	140	-29.17	23	1366	570
mmu-miR-6998-5p	NONMMUT059456.2	147	-29.16	147	-29.16	22	994	278
mmu-miR-1911-5p	NONMMUT064235.2	149	-29.16	149	-29.16	23	3151	125
mmu-miR-1946b	NONMMUT046460.2	146	-29.15	146	-29.15	26	2478	923
mmu-miR-7216-5p	NONMMUT064235.2	301	-46.7	152	-29.15	24	3151	1099 494
mmu-miR-7028-5p	NONMMUT049192.2	143	-29.14	143	-29.14	23	1011	531
mmu-miR-5131	NONMMUT141389.1	141	-29.11	141	-29.11	23	1366	189
mmu-miR-1231-5p	NONMMUT052500.2	141	-29.09	141	-29.09	23	2570	824
mmu-miR-7048-5p	NONMMUT059456.2	148	-29.09	148	-29.09	22	994	745
mmu-miR-7074-3p	NONMMUT052500.2	140	-29.08	140	-29.08	23	2570	561
mmu-miR-6963-5p	NONMMUT064235.2	153	-29.08	153	-29.08	24	3151	1925
mmu-miR-7085-5p	NONMMUT141389.1	150	-29.07	150	-29.07	22	1366	923
mmu-miR-3620-5p	NONMMUT059456.2	144	-29.05	144	-29.05	22	994	473
mmu-miR-7032-3p	NONMMUT064235.2	458	-78.91	168	-29	22	3151	701 760 16
mmu-miR-3077-3p	NONMMUT064235.2	172	-28.98	172	-28.98	22	3151	1396
mmu-miR-207	NONMMUT064235.2	575	-103.67	147	-28.97	23	3151	2800 849 799 2368
mmu-miR-3090-5p	NONMMUT064235.2	291	-51.07	149	-28.96	21	3151	1262 2917
mmu-miR-7069-5p	NONMMUT141389.1	305	-54.37	161	-28.94	23	1366	920 474
mmu-miR-12203-5p	NONMMUT049192.2	292	-54.47	149	-28.93	21	1011	674 834
mmu-miR-764-3p	NONMMUT064235.2	311	-48.62	166	-28.91	22	3151	2563 1841
mmu-miR-1955-5p	NONMMUT049192.2	140	-28.9	140	-28.9	25	1011	225
mmu-miR-7071-5p	NONMMUT064235.2	298	-52.2	153	-28.9	23	3151	524 2211
mmu-miR-7648-3p	NONMMUT064235.2	153	-28.88	153	-28.88	21	3151	1936
mmu-miR-5107-5p	NONMMUT141389.1	157	-28.86	157	-28.86	21	1366	574
mmu-miR-339-3p	NONMMUT059456.2	140	-28.85	140	-28.85	23	994	64
mmu-miR-6407	NONMMUT064235.2	151	-28.85	151	-28.85	23	3151	2046
mmu-miR-494-5p	NONMMUT052500.2	155	-28.85	155	-28.85	22	2570	277
mmu-miR-6929-5p	NONMMUT049192.2	465	-67.23	175	-28.85	21	1011	258 700 403
mmu-miR-7060-5p	NONMMUT052500.2	163	-28.82	163	-28.82	22	2570	1604
mmu-miR-760-5p	NONMMUT049192.2	159	-28.81	159	-28.81	23	1011	156
mmu-miR-328-5p	NONMMUT059456.2	143	-28.8	143	-28.8	22	994	904
mmu-miR-7062-5p	NONMMUT049192.2	434	-71.88	149	-28.79	24	1011	533 680 726
mmu-miR-6911-5p	NONMMUT059456.2	151	-28.78	151	-28.78	23	994	742
mmu-miR-7054-5p	NONMMUT052500.2	303	-53.42	158	-28.77	25	2570	296 687
mmu-miR-744-5p	NONMMUT049192.2	444	-75.91	152	-28.74	22	1011	472 199 379
mmu-miR-6900-5p	NONMMUT064235.2	142	-28.73	142	-28.73	24	3151	1820
mmu-miR-214-3p	NONMMUT046460.2	146	-28.72	146	-28.72	22	2478	485
mmu-miR-432	NONMMUT059456.2	290	-50.53	147	-28.7	23	994	575 771
mmu-miR-744-5p	NONMMUT059456.2	445	-81.66	152	-28.7	22	994	76 115 171
mmu-miR-770-3p	NONMMUT049192.2	142	-28.69	142	-28.69	22	1011	15
mmu-miR-1955-3p	NONMMUT064235.2	140	-28.68	140	-28.68	21	3151	495
mmu-miR-7658-3p	NONMMUT059456.2	146	-28.68	146	-28.68	21	994	16
mmu-miR-326-5p	NONMMUT064235.2	435	-79.23	151	-28.68	24	3151	1412 186 1150
mmu-miR-6396	NONMMUT049192.2	141	-28.67	141	-28.67	24	1011	374
mmu-miR-5122	NONMMUT049192.2	143	-28.67	143	-28.67	20	1011	484
mmu-miR-7216-5p	NONMMUT052500.2	141	-28.66	141	-28.66	24	2570	1428
mmu-miR-874-5p	NONMMUT049192.2	159	-28.65	159	-28.65	22	1011	232
mmu-miR-1199-3p	NONMMUT052500.2	145	-28.63	145	-28.63	21	2570	614
mmu-miR-1224-3p	NONMMUT064235.2	150	-28.63	150	-28.63	21	3151	730
mmu-miR-7030-5p	NONMMUT052500.2	596	-96.93	154	-28.63	22	2570	345 622 32 690
mmu-miR-92b-5p	NONMMUT052500.2	157	-28.61	157	-28.61	24	2570	658
mmu-miR-6368	NONMMUT049192.2	295	-44.24	148	-28.61	21	1011	702 532
mmu-miR-6996-3p	NONMMUT064235.2	450	-76.35	162	-28.61	23	3151	1643 1965 358
mmu-miR-1195	NONMMUT141389.1	143	-28.56	143	-28.56	23	1366	548
mmu-miR-181d-3p	NONMMUT064235.2	155	-28.55	155	-28.55	21	3151	533
mmu-miR-763	NONMMUT064235.2	464	-71.49	162	-28.55	22	3151	2006 194 551
mmu-miR-3154	NONMMUT049192.2	151	-28.54	151	-28.54	22	1011	39
mmu-miR-5110	NONMMUT046460.2	165	-28.54	165	-28.54	25	2478	339
mmu-miR-1893	NONMMUT052500.2	291	-55.98	148	-28.52	22	2570	419 1560
mmu-miR-1188-3p	NONMMUT049192.2	296	-49.64	152	-28.5	25	1011	572 192
mmu-miR-7039-3p	NONMMUT064235.2	319	-55.48	174	-28.5	22	3151	2806 738
mmu-miR-3569-5p	NONMMUT046460.2	147	-28.49	147	-28.49	21	2478	424
mmu-miR-6930-5p	NONMMUT052500.2	281	-51.09	141	-28.49	23	2570	699 1549
mmu-miR-122-5p	NONMMUT049192.2	154	-28.48	154	-28.48	22	1011	467
mmu-miR-705	NONMMUT046460.2	142	-28.46	142	-28.46	20	2478	224
mmu-miR-6979-5p	NONMMUT046460.2	141	-28.41	141	-28.41	20	2478	1702
mmu-miR-7000-5p	NONMMUT059456.2	143	-28.39	143	-28.39	22	994	624
mmu-miR-7670-3p	NONMMUT064235.2	153	-28.39	153	-28.39	23	3151	2023
mmu-miR-6936-5p	NONMMUT064235.2	148	-28.35	148	-28.35	21	3151	580
mmu-miR-153-5p	NONMMUT064235.2	445	-61.72	161	-28.35	23	3151	2072 971 1191
mmu-miR-7040-3p	NONMMUT059456.2	142	-28.34	142	-28.34	22	994	17
mmu-miR-1946b	NONMMUT049192.2	142	-28.29	142	-28.29	26	1011	122
mmu-miR-1966-5p	NONMMUT141389.1	141	-28.27	141	-28.27	25	1366	68
mmu-miR-6954-5p	NONMMUT141389.1	152	-28.27	152	-28.27	22	1366	119
mmu-miR-1895	NONMMUT052500.2	155	-28.24	155	-28.24	22	2570	490
mmu-miR-7689-3p	NONMMUT064235.2	146	-28.22	146	-28.22	23	3151	2729
mmu-miR-6989-5p	NONMMUT064235.2	158	-28.21	158	-28.21	22	3151	190
mmu-miR-6968-5p	NONMMUT052500.2	282	-55.2	142	-28.21	22	2570	688 397
mmu-miR-12186-5p	NONMMUT141389.1	299	-48.27	158	-28.21	21	1366	926 290
mmu-miR-351-5p	NONMMUT064235.2	141	-28.2	141	-28.2	24	3151	2902
mmu-miR-665-5p	NONMMUT049192.2	146	-28.2	146	-28.2	26	1011	721
mmu-miR-7648-5p	NONMMUT052500.2	150	-28.2	150	-28.2	20	2570	606
mmu-miR-7011-3p	NONMMUT052500.2	163	-28.19	163	-28.19	21	2570	1525
mmu-miR-6998-3p	NONMMUT052500.2	289	-50.61	147	-28.19	22	2570	459 1426
mmu-miR-673-5p	NONMMUT064235.2	459	-71.02	158	-28.19	22	3151	1039 641 2093
mmu-miR-92a-2-5p	NONMMUT141389.1	301	-48.83	158	-28.18	22	1366	512 141
mmu-miR-8101	NONMMUT052500.2	156	-28.12	156	-28.12	22	2570	1489
mmu-miR-7062-5p	NONMMUT059456.2	445	-79.45	150	-28.12	24	994	270 169 867
mmu-miR-6950-5p	NONMMUT052500.2	143	-28.1	143	-28.1	23	2570	1542
mmu-miR-34c-5p	NONMMUT141389.1	147	-28.09	147	-28.09	23	1366	239
mmu-miR-1306-5p	NONMMUT064235.2	150	-28.09	150	-28.09	23	3151	729
mmu-miR-7003-3p	NONMMUT052500.2	286	-55.08	143	-28.08	19	2570	736 784
mmu-miR-7025-5p	NONMMUT049192.2	144	-28.07	144	-28.07	24	1011	459
mmu-miR-1982-5p	NONMMUT046460.2	142	-28.04	142	-28.04	20	2478	211
mmu-miR-6950-5p	NONMMUT064235.2	151	-28.03	151	-28.03	23	3151	908
mmu-miR-6932-3p	NONMMUT064235.2	309	-51.8	168	-28.03	21	3151	2808 1635
mmu-miR-128-2-5p	NONMMUT049192.2	289	-48.16	147	-28	23	1011	17 197
mmu-miR-6934-3p	NONMMUT052500.2	143	-27.99	143	-27.99	22	2570	887
mmu-miR-3620-5p	NONMMUT052500.2	148	-27.97	148	-27.97	22	2570	681
mmu-miR-6913-3p	NONMMUT064235.2	156	-27.97	156	-27.97	23	3151	664
mmu-miR-149-3p	NONMMUT064235.2	140	-27.96	140	-27.96	22	3151	1478
mmu-miR-1930-3p	NONMMUT052500.2	145	-27.96	145	-27.96	22	2570	823
mmu-miR-7239-5p	NONMMUT064235.2	173	-27.96	173	-27.96	20	3151	1838
mmu-miR-5616-5p	NONMMUT064235.2	300	-46.84	150	-27.96	21	3151	617 703
mmu-miR-3474	NONMMUT141389.1	149	-27.95	149	-27.95	22	1366	669
mmu-miR-3085-5p	NONMMUT046460.2	302	-47.3	156	-27.95	25	2478	397 2121
mmu-miR-5110	NONMMUT064235.2	140	-27.94	140	-27.94	25	3151	3099
mmu-miR-3473e	NONMMUT049192.2	140	-27.94	140	-27.94	21	1011	682
mmu-miR-6948-3p	NONMMUT052500.2	142	-27.94	142	-27.94	21	2570	1708
mmu-miR-7047-3p	NONMMUT059456.2	158	-27.93	158	-27.93	23	994	14
mmu-miR-6909-5p	NONMMUT052500.2	441	-80.52	150	-27.92	22	2570	400 668 687
mmu-miR-29b-1-5p	NONMMUT049192.2	141	-27.89	141	-27.89	22	1011	556
mmu-miR-1960	NONMMUT064235.2	146	-27.89	146	-27.89	22	3151	185
mmu-miR-6913-5p	NONMMUT064235.2	296	-50.96	150	-27.89	22	3151	528 1701
mmu-miR-12197-3p	NONMMUT059456.2	148	-27.86	148	-27.86	18	994	79
mmu-miR-324-3p	NONMMUT141389.1	146	-27.84	146	-27.84	20	1366	538
mmu-miR-7655-5p	NONMMUT141389.1	154	-27.82	154	-27.82	22	1366	187
mmu-miR-1291	NONMMUT052500.2	296	-46.5	156	-27.82	26	2570	2333 1089
mmu-miR-3100-5p	NONMMUT049192.2	153	-27.79	153	-27.79	23	1011	625
mmu-miR-29b-2-5p	NONMMUT049192.2	145	-27.77	145	-27.77	25	1011	90
mmu-miR-7059-5p	NONMMUT049192.2	154	-27.74	154	-27.74	22	1011	31
mmu-miR-7682-3p	NONMMUT064235.2	451	-81.06	152	-27.74	21	3151	2924 2549 1942
mmu-miR-7669-3p	NONMMUT064235.2	598	-90.1	155	-27.73	23	3151	2003 192 547 1936
mmu-miR-3474	NONMMUT064235.2	289	-47.64	146	-27.72	22	3151	1915 1567
mmu-miR-6981-5p	NONMMUT064235.2	149	-27.71	149	-27.71	26	3151	2897
mmu-miR-1306-5p	NONMMUT052500.2	150	-27.69	150	-27.69	23	2570	2236
mmu-miR-3961	NONMMUT049192.2	161	-27.69	161	-27.69	19	1011	162
mmu-miR-6972-5p	NONMMUT064235.2	149	-27.67	149	-27.67	23	3151	2562
mmu-miR-1946b	NONMMUT064235.2	145	-27.66	145	-27.66	26	3151	1355
mmu-miR-7062-5p	NONMMUT064235.2	296	-54.39	150	-27.65	24	3151	2560 1840
mmu-miR-7085-5p	NONMMUT049192.2	141	-27.64	141	-27.64	22	1011	407
mmu-miR-7005-5p	NONMMUT049192.2	144	-27.62	144	-27.62	22	1011	30
mmu-miR-7032-5p	NONMMUT049192.2	143	-27.61	143	-27.61	26	1011	754
mmu-miR-7040-3p	NONMMUT141389.1	155	-27.61	155	-27.61	22	1366	413
mmu-miR-207	NONMMUT052500.2	149	-27.59	149	-27.59	23	2570	1521
mmu-miR-6380	NONMMUT064235.2	314	-45.88	158	-27.59	24	3151	2474 2347
mmu-miR-7080-5p	NONMMUT141389.1	140	-27.58	140	-27.58	23	1366	661
mmu-miR-6919-5p	NONMMUT052500.2	143	-27.56	143	-27.56	23	2570	724
mmu-miR-1188-3p	NONMMUT141389.1	148	-27.56	148	-27.56	25	1366	287
mmu-miR-6958-3p	NONMMUT049192.2	149	-27.56	149	-27.56	23	1011	182
mmu-miR-7056-3p	NONMMUT064235.2	312	-49.85	163	-27.56	22	3151	648 789
mmu-miR-652-5p	NONMMUT052500.2	141	-27.55	141	-27.55	24	2570	2441
mmu-miR-7686-5p	NONMMUT064235.2	153	-27.55	153	-27.55	25	3151	2518
mmu-miR-7062-5p	NONMMUT141389.1	306	-54.32	162	-27.55	24	1366	477 42
mmu-miR-6982-5p	NONMMUT141389.1	150	-27.54	150	-27.54	25	1366	662
mmu-miR-7213-5p	NONMMUT064235.2	296	-47.54	156	-27.54	20	3151	1260 710
mmu-miR-3102-5p	NONMMUT049192.2	140	-27.51	140	-27.51	22	1011	206
mmu-miR-8113	NONMMUT059456.2	290	-46.86	148	-27.51	22	994	950 964
mmu-miR-7034-5p	NONMMUT141389.1	152	-27.5	152	-27.5	21	1366	71
mmu-miR-6915-5p	NONMMUT064235.2	158	-27.5	158	-27.5	24	3151	371
mmu-miR-7242-5p	NONMMUT064235.2	283	-42.7	142	-27.5	22	3151	1930 1604
mmu-miR-134-5p	NONMMUT049192.2	176	-27.49	176	-27.49	22	1011	758
mmu-miR-1906	NONMMUT059456.2	303	-54.91	156	-27.49	22	994	121 913
mmu-miR-151-3p	NONMMUT141389.1	155	-27.45	155	-27.45	21	1366	574
mmu-miR-7661-3p	NONMMUT064235.2	178	-27.45	178	-27.45	22	3151	1396
mmu-miR-6394	NONMMUT052500.2	140	-27.42	140	-27.42	21	2570	491
mmu-miR-7117-3p	NONMMUT064235.2	157	-27.42	157	-27.42	20	3151	2803
mmu-miR-12191-5p	NONMMUT049192.2	285	-52.27	145	-27.42	20	1011	706 20
mmu-miR-7002-5p	NONMMUT059456.2	150	-27.41	150	-27.41	21	994	201
mmu-miR-6347	NONMMUT064235.2	143	-27.37	143	-27.37	22	3151	227
mmu-miR-93-5p	NONMMUT064235.2	163	-27.37	163	-27.37	23	3151	2349
mmu-miR-6974-3p	NONMMUT064235.2	165	-27.37	165	-27.37	22	3151	667
mmu-miR-874-3p	NONMMUT064235.2	160	-27.36	160	-27.36	22	3151	72
mmu-miR-6913-5p	NONMMUT141389.1	150	-27.35	150	-27.35	22	1366	45
mmu-miR-7666-5p	NONMMUT141389.1	159	-27.33	159	-27.33	22	1366	293
mmu-miR-5134-3p	NONMMUT141389.1	142	-27.32	142	-27.32	22	1366	191
mmu-miR-3067-5p	NONMMUT064235.2	150	-27.32	150	-27.32	23	3151	14
mmu-miR-698-5p	NONMMUT064235.2	302	-47.64	158	-27.31	21	3151	2913 2586
mmu-miR-7671-5p	NONMMUT052500.2	435	-71.31	151	-27.29	23	2570	964 380 1089
mmu-miR-6994-3p	NONMMUT049192.2	142	-27.28	142	-27.28	21	1011	824
mmu-miR-483-3p	NONMMUT064235.2	147	-27.21	147	-27.21	21	3151	796
mmu-miR-3620-5p	NONMMUT141389.1	145	-27.18	145	-27.18	22	1366	204
mmu-miR-1946b	NONMMUT141389.1	148	-27.18	148	-27.18	26	1366	583
mmu-miR-7005-5p	NONMMUT064235.2	154	-27.16	154	-27.16	22	3151	192
mmu-miR-1907	NONMMUT059456.2	303	-45.06	160	-27.16	22	994	120 513
mmu-miR-1911-3p	NONMMUT052500.2	147	-27.15	147	-27.15	22	2570	934
mmu-miR-770-3p	NONMMUT059456.2	148	-27.15	148	-27.15	22	994	472
mmu-miR-500-5p	NONMMUT049192.2	166	-27.15	166	-27.15	25	1011	941
mmu-miR-7052-5p	NONMMUT049192.2	152	-27.14	152	-27.14	21	1011	703
mmu-miR-7224-3p	NONMMUT052500.2	141	-27.12	141	-27.12	21	2570	305
mmu-miR-133b-3p	NONMMUT052500.2	143	-27.09	143	-27.09	22	2570	2293
mmu-miR-99b-3p	NONMMUT049192.2	147	-27.08	147	-27.08	22	1011	138
mmu-miR-6911-5p	NONMMUT052500.2	144	-27.06	144	-27.06	23	2570	28
mmu-miR-1190	NONMMUT064235.2	306	-45.89	166	-27.05	22	3151	128 162
mmu-miR-3072-5p	NONMMUT049192.2	142	-27.03	142	-27.03	22	1011	318
mmu-miR-504-3p	NONMMUT052500.2	157	-27.01	157	-27.01	22	2570	673
mmu-miR-12182-5p	NONMMUT064235.2	321	-49.54	171	-27.01	22	3151	136 720
mmu-miR-5120	NONMMUT141389.1	145	-27	145	-27	23	1366	34
mmu-miR-7655-5p	NONMMUT049192.2	149	-27	149	-27	22	1011	654
mmu-miR-6985-3p	NONMMUT064235.2	319	-49.14	161	-27	21	3151	640 1038
mmu-miR-7016-3p	NONMMUT052500.2	285	-51.47	144	-26.99	22	2570	1707 563
mmu-miR-709	NONMMUT064235.2	281	-50.58	141	-26.98	19	3151	1700 2995
mmu-miR-6995-5p	NONMMUT052500.2	283	-40.91	143	-26.96	23	2570	1863 104
mmu-miR-351-3p	NONMMUT052500.2	154	-26.95	154	-26.95	21	2570	704
mmu-miR-6349	NONMMUT046460.2	287	-49.92	145	-26.95	22	2478	228 204
mmu-miR-2139	NONMMUT059456.2	143	-26.93	143	-26.93	24	994	137
mmu-miR-6992-5p	NONMMUT049192.2	143	-26.93	143	-26.93	23	1011	778
mmu-miR-7682-3p	NONMMUT049192.2	163	-26.92	163	-26.92	21	1011	525
mmu-miR-6943-3p	NONMMUT052500.2	296	-39.45	153	-26.91	22	2570	1521 1365
mmu-miR-3065-3p	NONMMUT046460.2	445	-74.54	153	-26.9	23	2478	426 406 487
mmu-miR-375-3p	NONMMUT064235.2	150	-26.89	150	-26.89	22	3151	572
mmu-miR-7674-3p	NONMMUT059456.2	163	-26.89	163	-26.89	21	994	582
mmu-miR-3090-3p	NONMMUT052500.2	143	-26.88	143	-26.88	22	2570	1423
mmu-miR-341-5p	NONMMUT141389.1	146	-26.88	146	-26.88	21	1366	60
mmu-miR-7036a-3p	NONMMUT059456.2	151	-26.86	151	-26.86	23	994	29
mmu-miR-6992-5p	NONMMUT052500.2	162	-26.86	162	-26.86	23	2570	830
mmu-miR-6410	NONMMUT064235.2	149	-26.85	149	-26.85	22	3151	1824
mmu-miR-7656-3p	NONMMUT052500.2	300	-46.74	151	-26.85	22	2570	812 1155
mmu-miR-692	NONMMUT052500.2	140	-26.84	140	-26.84	21	2570	2234
mmu-miR-5107-5p	NONMMUT059456.2	300	-51.67	154	-26.83	21	994	279 903
mmu-miR-8111	NONMMUT046460.2	143	-26.82	143	-26.82	21	2478	927
mmu-miR-6980-5p	NONMMUT049192.2	143	-26.81	143	-26.81	22	1011	407
mmu-miR-149-5p	NONMMUT052500.2	149	-26.8	149	-26.8	23	2570	1094
mmu-miR-7215-3p	NONMMUT141389.1	163	-26.8	163	-26.8	23	1366	1203
mmu-miR-6396	NONMMUT064235.2	438	-72.75	156	-26.8	24	3151	165 2819 701
mmu-miR-7049-3p	NONMMUT049192.2	157	-26.78	157	-26.78	21	1011	637
mmu-miR-6978-5p	NONMMUT052500.2	421	-65.92	141	-26.77	23	2570	30 161 2344
mmu-miR-714	NONMMUT141389.1	153	-26.76	153	-26.76	21	1366	689
mmu-miR-6973b-5p	NONMMUT052500.2	289	-53.21	145	-26.76	24	2570	1870 1675
mmu-miR-466i-3p	NONMMUT046460.2	151	-26.74	151	-26.74	22	2478	1151
mmu-miR-7004-5p	NONMMUT046460.2	145	-26.73	145	-26.73	24	2478	526
mmu-miR-7056-5p	NONMMUT046460.2	153	-26.73	153	-26.73	22	2478	346
mmu-miR-5125	NONMMUT064235.2	141	-26.72	141	-26.72	20	3151	2722
mmu-miR-6403	NONMMUT052500.2	163	-26.72	163	-26.72	22	2570	763
mmu-miR-7672-3p	NONMMUT052500.2	150	-26.71	150	-26.71	21	2570	797
mmu-miR-6907-5p	NONMMUT141389.1	152	-26.71	152	-26.71	22	1366	564
mmu-miR-7075-5p	NONMMUT052500.2	587	-90.94	150	-26.71	21	2570	346 36 1669 624
mmu-miR-3104-3p	NONMMUT052500.2	141	-26.7	141	-26.7	23	2570	750
mmu-miR-125a-5p	NONMMUT049192.2	156	-26.7	156	-26.7	24	1011	303
mmu-miR-7003-5p	NONMMUT052500.2	288	-44.08	147	-26.7	21	2570	39 627
mmu-miR-504-5p	NONMMUT141389.1	145	-26.67	145	-26.67	22	1366	43
mmu-miR-7024-5p	NONMMUT052500.2	298	-48.08	151	-26.66	21	2570	347 664
mmu-miR-486a-3p	NONMMUT141389.1	146	-26.65	146	-26.65	21	1366	120
mmu-miR-486b-3p	NONMMUT141389.1	146	-26.65	146	-26.65	20	1366	121
mmu-miR-7674-5p	NONMMUT141389.1	290	-44.71	148	-26.65	24	1366	1017 1257
mmu-miR-3075-5p	NONMMUT064235.2	148	-26.64	148	-26.64	21	3151	1914
mmu-miR-7237-5p	NONMMUT141389.1	286	-45.32	143	-26.64	24	1366	886 1215
mmu-miR-7677-3p	NONMMUT052500.2	447	-78.16	155	-26.64	23	2570	283 1526 795
mmu-miR-7049-3p	NONMMUT052500.2	151	-26.59	151	-26.59	21	2570	820
mmu-miR-25-5p	NONMMUT049192.2	304	-45.59	164	-26.59	22	1011	541 473
mmu-miR-7658-3p	NONMMUT052500.2	146	-26.57	146	-26.57	21	2570	2234
mmu-miR-486a-3p	NONMMUT059456.2	140	-26.55	140	-26.55	21	994	572
mmu-miR-346-3p	NONMMUT064235.2	290	-49.7	149	-26.55	22	3151	36 2052
mmu-miR-6941-5p	NONMMUT059456.2	141	-26.54	141	-26.54	21	994	750
mmu-miR-6977-5p	NONMMUT141389.1	148	-26.53	148	-26.53	25	1366	431
mmu-miR-770-5p	NONMMUT052500.2	142	-26.49	142	-26.49	22	2570	1093
mmu-miR-7079-5p	NONMMUT059456.2	145	-26.49	145	-26.49	22	994	740
mmu-miR-7020-3p	NONMMUT141389.1	141	-26.48	141	-26.48	21	1366	415
mmu-miR-5622-3p	NONMMUT052500.2	151	-26.48	151	-26.48	22	2570	48
mmu-miR-6923-5p	NONMMUT064235.2	286	-51.94	146	-26.48	24	3151	1917 2554
mmu-miR-326-5p	NONMMUT141389.1	294	-52.26	153	-26.46	24	1366	116 571
mmu-miR-1249-5p	NONMMUT046460.2	435	-71.73	148	-26.46	25	2478	339 202 962
mmu-miR-7090-5p	NONMMUT049192.2	140	-26.45	140	-26.45	23	1011	154
mmu-miR-7019-5p	NONMMUT046460.2	144	-26.45	144	-26.45	23	2478	209
mmu-miR-6938-3p	NONMMUT059456.2	150	-26.45	150	-26.45	22	994	353
mmu-miR-5110	NONMMUT052500.2	301	-47.88	161	-26.45	25	2570	686 1826
mmu-miR-764-3p	NONMMUT049192.2	455	-69.23	155	-26.45	22	1011	682 538 726
mmu-miR-491-5p	NONMMUT049192.2	142	-26.42	142	-26.42	22	1011	698
mmu-miR-7077-5p	NONMMUT059456.2	148	-26.42	148	-26.42	21	994	184
mmu-miR-7663-5p	NONMMUT064235.2	302	-45.12	158	-26.42	23	3151	1847 2849
mmu-miR-130a-5p	NONMMUT064235.2	444	-46.81	156	-26.42	22	3151	2786 701 1316
mmu-miR-6975-5p	NONMMUT064235.2	146	-26.4	146	-26.4	23	3151	192
mmu-miR-5623-5p	NONMMUT064235.2	293	-50.87	151	-26.4	24	3151	196 2001
mmu-miR-7011-5p	NONMMUT049192.2	149	-26.38	149	-26.38	23	1011	400
mmu-miR-7048-5p	NONMMUT064235.2	156	-26.38	156	-26.38	22	3151	1938
mmu-miR-6902-5p	NONMMUT064235.2	451	-62.36	151	-26.38	22	3151	649 792 2870
mmu-miR-125b-5p	NONMMUT049192.2	308	-44.92	161	-26.37	22	1011	303 809
mmu-miR-92a-2-5p	NONMMUT059456.2	140	-26.36	140	-26.36	22	994	77
mmu-miR-7684-5p	NONMMUT059456.2	140	-26.36	140	-26.36	21	994	652
mmu-miR-133a-3p	NONMMUT052500.2	143	-26.35	143	-26.35	22	2570	2293
mmu-miR-6926-3p	NONMMUT064235.2	145	-26.35	145	-26.35	21	3151	2088
mmu-miR-6918-5p	NONMMUT052500.2	282	-47.03	141	-26.35	23	2570	136 692
mmu-miR-7087-5p	NONMMUT064235.2	289	-47.36	149	-26.34	21	3151	1694 2110
mmu-miR-6905-5p	NONMMUT064235.2	141	-26.33	141	-26.33	23	3151	1934
mmu-miR-12194-3p	NONMMUT052500.2	142	-26.32	142	-26.32	22	2570	836
mmu-miR-718	NONMMUT049192.2	147	-26.31	147	-26.31	21	1011	370
mmu-miR-7063-5p	NONMMUT046460.2	309	-44.89	167	-26.31	23	2478	1922 551
mmu-miR-1946a	NONMMUT049192.2	283	-50.87	142	-26.28	27	1011	5 663
mmu-miR-3099-3p	NONMMUT052500.2	155	-26.27	155	-26.27	22	2570	1021
mmu-miR-3083-5p	NONMMUT064235.2	306	-43.63	166	-26.26	22	3151	2003 1936
mmu-miR-1187	NONMMUT046460.2	457	-57.22	161	-26.26	23	2478	284 2453 1159
mmu-miR-6540-5p	NONMMUT141389.1	300	-40.14	156	-26.25	22	1366	602 1133
mmu-miR-3102-5p	NONMMUT046460.2	149	-26.23	149	-26.23	22	2478	234
mmu-miR-7242-3p	NONMMUT049192.2	151	-26.23	151	-26.23	22	1011	788
mmu-miR-12202-5p	NONMMUT064235.2	157	-26.23	157	-26.23	24	3151	353
mmu-miR-7082-5p	NONMMUT059456.2	141	-26.22	141	-26.22	21	994	280
mmu-miR-7069-5p	NONMMUT059456.2	144	-26.22	144	-26.22	23	994	211
mmu-miR-3097-5p	NONMMUT141389.1	140	-26.2	140	-26.2	23	1366	94
mmu-miR-6927-5p	NONMMUT059456.2	158	-26.2	158	-26.2	22	994	736
mmu-miR-1231-5p	NONMMUT059456.2	297	-51.11	156	-26.19	23	994	639 278
mmu-miR-7089-5p	NONMMUT049192.2	282	-49.04	142	-26.18	24	1011	701 792
mmu-miR-7676-5p	NONMMUT064235.2	155	-26.17	155	-26.17	23	3151	1406
mmu-miR-6987-5p	NONMMUT064235.2	293	-48.94	152	-26.17	22	3151	188 1696
mmu-miR-6929-5p	NONMMUT059456.2	154	-26.16	154	-26.16	21	994	127
mmu-miR-8117	NONMMUT064235.2	167	-26.16	167	-26.16	21	3151	356
mmu-miR-1911-5p	NONMMUT052500.2	140	-26.14	140	-26.14	23	2570	60
mmu-miR-128-1-5p	NONMMUT049192.2	290	-50.4	147	-26.14	21	1011	23 256
mmu-miR-12188-3p	NONMMUT064235.2	156	-26.13	156	-26.13	27	3151	180
mmu-miR-1966-5p	NONMMUT064235.2	602	-91.38	173	-26.13	25	3151	2049 34 140 1492
mmu-miR-6917-3p	NONMMUT064235.2	451	-55.09	157	-26.12	22	3151	815 801 1591
mmu-miR-6953-5p	NONMMUT064235.2	431	-69.71	151	-26.11	26	3151	1409 1439 2108
mmu-miR-18b-3p	NONMMUT052500.2	153	-26.07	153	-26.07	22	2570	1798
mmu-miR-6950-3p	NONMMUT064235.2	742	-99.17	155	-26.06	21	3151	2136 2804 2698 1667 1018
mmu-miR-1941-5p	NONMMUT059456.2	149	-26.03	149	-26.03	24	994	733
mmu-miR-6930-5p	NONMMUT064235.2	300	-48.39	154	-26.03	23	3151	3105 362
mmu-miR-92b-3p	NONMMUT046460.2	143	-26.02	143	-26.02	22	2478	369
mmu-miR-423-3p	NONMMUT064235.2	145	-26.02	145	-26.02	23	3151	3044
mmu-miR-381-5p	NONMMUT064235.2	146	-26.02	146	-26.02	23	3151	2889
mmu-miR-6989-5p	NONMMUT059456.2	293	-50.12	152	-26.02	22	994	613 747
mmu-miR-1941-5p	NONMMUT141389.1	445	-71.97	149	-26.02	24	1366	509 46 1315
mmu-miR-5131	NONMMUT052500.2	142	-26	142	-26	23	2570	760
mmu-miR-503-5p	NONMMUT059456.2	150	-26	150	-26	23	994	116
mmu-miR-7019-5p	NONMMUT064235.2	290	-51.78	148	-26	23	3151	2003 1911
mmu-miR-7076-5p	NONMMUT052500.2	602	-99.15	158	-26	21	2570	345 35 625 1669
mmu-miR-7058-5p	NONMMUT052500.2	733	-120.71	157	-26	24	2570	1663 667 1854 1922 2064
mmu-miR-7015-5p	NONMMUT064235.2	448	-72.04	154	-25.99	23	3151	1661 2732 1384
mmu-miR-7212-5p	NONMMUT141389.1	151	-25.98	151	-25.98	21	1366	923
mmu-miR-7688-5p	NONMMUT059456.2	149	-25.96	149	-25.96	23	994	943
mmu-miR-2139	NONMMUT064235.2	143	-25.95	143	-25.95	24	3151	691
mmu-miR-532-3p	NONMMUT064235.2	149	-25.95	149	-25.95	22	3151	461
mmu-miR-665-5p	NONMMUT064235.2	281	-46.88	141	-25.95	26	3151	1953 2817
mmu-miR-615-3p	NONMMUT049192.2	285	-44.09	145	-25.95	22	1011	140 1
mmu-miR-7235-3p	NONMMUT046460.2	302	-37.9	158	-25.95	23	2478	2221 1523
mmu-miR-681	NONMMUT052500.2	141	-25.94	141	-25.94	21	2570	1263
mmu-miR-6978-3p	NONMMUT052500.2	287	-48.81	144	-25.93	23	2570	563 1091
mmu-miR-7214-3p	NONMMUT064235.2	150	-25.92	150	-25.92	24	3151	1304
mmu-miR-493-3p	NONMMUT049192.2	160	-25.92	160	-25.92	23	1011	56
mmu-miR-7034-5p	NONMMUT049192.2	146	-25.9	146	-25.9	21	1011	260
mmu-miR-5122	NONMMUT059456.2	157	-25.9	157	-25.9	20	994	464
mmu-miR-6939-5p	NONMMUT141389.1	141	-25.87	141	-25.87	21	1366	118
mmu-miR-8101	NONMMUT049192.2	141	-25.84	141	-25.84	22	1011	641
mmu-miR-6916-3p	NONMMUT064235.2	163	-25.84	163	-25.84	22	3151	1626
mmu-miR-9768-3p	NONMMUT064235.2	723	-111.64	150	-25.84	24	3151	1013 682 387 2358 2077
mmu-miR-296-3p	NONMMUT059456.2	141	-25.82	141	-25.82	22	994	212
mmu-miR-29b-2-5p	NONMMUT052500.2	140	-25.81	140	-25.81	25	2570	195
mmu-miR-3058-5p	NONMMUT052500.2	425	-62.41	144	-25.81	23	2570	2276 519 1208
mmu-miR-7009-5p	NONMMUT064235.2	144	-25.78	144	-25.78	22	3151	1422
mmu-miR-466c-5p	NONMMUT046460.2	445	-66.97	154	-25.78	24	2478	284 1159 2455
mmu-miR-6409	NONMMUT059456.2	140	-25.76	140	-25.76	23	994	109
mmu-miR-7019-3p	NONMMUT064235.2	147	-25.76	147	-25.76	23	3151	788
mmu-miR-7673-3p	NONMMUT064235.2	289	-42.72	147	-25.76	23	3151	792 651
mmu-miR-12188-3p	NONMMUT052500.2	151	-25.75	151	-25.75	27	2570	1729
mmu-miR-6945-5p	NONMMUT064235.2	155	-25.73	155	-25.73	22	3151	1915
mmu-miR-3091-3p	NONMMUT064235.2	300	-50.82	154	-25.73	22	3151	220 1913
mmu-miR-7671-3p	NONMMUT049192.2	142	-25.71	142	-25.71	22	1011	320
mmu-miR-12185-5p	NONMMUT059456.2	283	-50.4	143	-25.71	25	994	745 205
mmu-miR-6909-5p	NONMMUT046460.2	143	-25.7	143	-25.7	22	2478	583
mmu-miR-7058-3p	NONMMUT064235.2	291	-44.79	151	-25.7	22	3151	795 1030
mmu-miR-7665-5p	NONMMUT046460.2	577	-86.46	149	-25.7	23	2478	1704 970 196 220
mmu-miR-486a-5p	NONMMUT064235.2	294	-50.96	152	-25.67	22	3151	69 55
mmu-miR-486b-5p	NONMMUT064235.2	294	-50.96	152	-25.67	22	3151	69 55
mmu-miR-7054-5p	NONMMUT049192.2	151	-25.66	151	-25.66	25	1011	59
mmu-miR-674-5p	NONMMUT141389.1	141	-25.65	141	-25.65	22	1366	568
mmu-miR-1199-3p	NONMMUT059456.2	151	-25.65	151	-25.65	21	994	104
mmu-miR-5134-3p	NONMMUT049192.2	160	-25.6	160	-25.6	22	1011	98
mmu-miR-6986-5p	NONMMUT141389.1	150	-25.59	150	-25.59	22	1366	664
mmu-miR-1231-5p	NONMMUT064235.2	144	-25.58	144	-25.58	23	3151	964
mmu-miR-1930-3p	NONMMUT141389.1	303	-43.25	152	-25.58	22	1366	872 241
mmu-miR-7659-5p	NONMMUT052500.2	157	-25.57	157	-25.57	22	2570	460
mmu-miR-6904-5p	NONMMUT064235.2	298	-49.59	152	-25.57	22	3151	1417 2225
mmu-miR-194-1-3p	NONMMUT141389.1	159	-25.56	159	-25.56	22	1366	527
mmu-miR-6969-3p	NONMMUT064235.2	140	-25.55	140	-25.55	20	3151	2093
mmu-miR-6539	NONMMUT052500.2	144	-25.55	144	-25.55	24	2570	2347
mmu-miR-7081-3p	NONMMUT052500.2	144	-25.55	144	-25.55	22	2570	1519
mmu-miR-125a-3p	NONMMUT064235.2	155	-25.55	155	-25.55	22	3151	1730
mmu-miR-7076-5p	NONMMUT049192.2	146	-25.54	146	-25.54	21	1011	401
mmu-miR-1982-3p	NONMMUT141389.1	147	-25.54	147	-25.54	23	1366	322
mmu-miR-375-5p	NONMMUT049192.2	149	-25.54	149	-25.54	22	1011	644
mmu-miR-493-3p	NONMMUT064235.2	155	-25.54	155	-25.54	23	3151	1796
mmu-miR-8093	NONMMUT064235.2	148	-25.53	148	-25.53	21	3151	500
mmu-miR-673-3p	NONMMUT141389.1	150	-25.53	150	-25.53	23	1366	118
mmu-miR-666-3p	NONMMUT052500.2	288	-47.35	148	-25.53	22	2570	816 750
mmu-miR-34c-5p	NONMMUT064235.2	458	-61.85	161	-25.51	23	3151	1410 1355 1967
mmu-miR-679-5p	NONMMUT052500.2	144	-25.5	144	-25.5	22	2570	841
mmu-miR-700-3p	NONMMUT059456.2	156	-25.49	156	-25.49	21	994	464
mmu-miR-466f-5p	NONMMUT049192.2	142	-25.47	142	-25.47	22	1011	651
mmu-miR-7001-5p	NONMMUT064235.2	301	-46.85	155	-25.46	23	3151	1147 36
mmu-miR-761	NONMMUT064235.2	463	-68.59	160	-25.45	22	3151	1693 1147 2052
mmu-miR-1946a	NONMMUT059456.2	147	-25.44	147	-25.44	27	994	939
mmu-miR-6952-5p	NONMMUT052500.2	298	-50.25	152	-25.44	22	2570	1588 681
mmu-miR-1968-3p	NONMMUT064235.2	153	-25.43	153	-25.43	21	3151	730
mmu-miR-106a-3p	NONMMUT059456.2	163	-25.43	163	-25.43	23	994	727
mmu-miR-543-5p	NONMMUT052500.2	142	-25.42	142	-25.42	21	2570	1149
mmu-miR-1249-3p	NONMMUT049192.2	148	-25.42	148	-25.42	22	1011	366
mmu-miR-1970c-3p	NONMMUT064235.2	162	-25.42	162	-25.42	22	3151	223
mmu-miR-351-5p	NONMMUT059456.2	143	-25.41	143	-25.41	24	994	347
mmu-miR-362-5p	NONMMUT052500.2	298	-45.33	152	-25.41	24	2570	2229 1464
mmu-miR-12186-3p	NONMMUT064235.2	582	-88.68	150	-25.41	21	3151	194 224 2008 2096
mmu-miR-6913-5p	NONMMUT059456.2	154	-25.4	154	-25.4	22	994	730
mmu-miR-141-5p	NONMMUT064235.2	306	-50.26	165	-25.4	22	3151	240 726
mmu-miR-7005-5p	NONMMUT052500.2	141	-25.39	141	-25.39	22	2570	676
mmu-miR-1970c-3p	NONMMUT052500.2	144	-25.38	144	-25.38	22	2570	808
mmu-miR-7688-5p	NONMMUT064235.2	1032	-159.1	159	-25.37	23	3151	2005 550 1936 188 129 220 709
mmu-miR-7233-3p	NONMMUT064235.2	304	-41.59	153	-25.36	22	3151	1023 2294
mmu-miR-341-3p	NONMMUT141389.1	142	-25.28	142	-25.28	21	1366	57
mmu-miR-7080-5p	NONMMUT064235.2	291	-47.99	146	-25.28	23	3151	2982 2113
mmu-miR-6991-5p	NONMMUT141389.1	296	-42.2	152	-25.28	22	1366	174 853
mmu-miR-12184-5p	NONMMUT064235.2	147	-25.27	147	-25.27	22	3151	2568
mmu-miR-6928-3p	NONMMUT052500.2	293	-45.72	151	-25.27	22	2570	1525 1148
mmu-miR-7659-5p	NONMMUT141389.1	155	-25.26	155	-25.26	22	1366	69
mmu-miR-7068-3p	NONMMUT064235.2	141	-25.25	141	-25.25	21	3151	758
mmu-miR-466i-5p	NONMMUT052500.2	142	-25.23	142	-25.23	20	2570	369
mmu-miR-5120	NONMMUT064235.2	147	-25.23	147	-25.23	23	3151	1413
mmu-miR-1943-3p	NONMMUT052500.2	153	-25.23	153	-25.23	21	2570	762
mmu-miR-1905	NONMMUT049192.2	142	-25.22	142	-25.22	22	1011	227
mmu-miR-12182-5p	NONMMUT046460.2	147	-25.21	147	-25.21	22	2478	408
mmu-miR-185-3p	NONMMUT064235.2	435	-70.07	148	-25.21	21	3151	1939 2889 1682
mmu-miR-6940-5p	NONMMUT064235.2	157	-25.2	157	-25.2	23	3151	1935
mmu-miR-7015-5p	NONMMUT141389.1	156	-25.19	156	-25.19	23	1366	874
mmu-miR-3110-5p	NONMMUT064235.2	426	-65.4	145	-25.19	21	3151	1017 2363 75
mmu-miR-145a-5p	NONMMUT052500.2	143	-25.18	143	-25.18	23	2570	1335
mmu-miR-7072-3p	NONMMUT046460.2	173	-25.18	173	-25.18	21	2478	1096
mmu-let-7g-3p	NONMMUT064235.2	309	-42.18	159	-25.17	22	3151	2733 1383
mmu-miR-7685-5p	NONMMUT049192.2	141	-25.16	141	-25.16	24	1011	599
mmu-miR-7058-3p	NONMMUT141389.1	141	-25.14	141	-25.14	22	1366	312
mmu-miR-8101	NONMMUT059456.2	145	-25.14	145	-25.14	22	994	94
mmu-miR-7070-5p	NONMMUT059456.2	159	-25.14	159	-25.14	21	994	740
mmu-miR-6922-5p	NONMMUT064235.2	294	-43.62	151	-25.13	23	3151	141 2540
mmu-miR-1966-5p	NONMMUT052500.2	146	-25.11	146	-25.11	25	2570	434
mmu-miR-6369	NONMMUT064235.2	150	-25.11	150	-25.11	23	3151	1308
mmu-miR-2861	NONMMUT064235.2	293	-42.27	153	-25.11	19	3151	1920 222
mmu-miR-5625-5p	NONMMUT064235.2	140	-25.1	140	-25.1	21	3151	1884
mmu-miR-3095-3p	NONMMUT064235.2	155	-25.1	155	-25.1	23	3151	2062
mmu-miR-25-5p	NONMMUT052500.2	144	-25.08	144	-25.08	22	2570	168
mmu-miR-7676-3p	NONMMUT049192.2	143	-25.07	143	-25.07	22	1011	597
mmu-miR-214-3p	NONMMUT064235.2	302	-38.43	160	-25.07	22	3151	1693 2056
mmu-miR-7063-3p	NONMMUT064235.2	604	-92.01	158	-25.06	20	3151	1580 1268 78 1627
mmu-miR-5615-3p	NONMMUT046460.2	312	-43.03	171	-25.04	22	2478	1655 1295
mmu-miR-9769-3p	NONMMUT059456.2	140	-25.03	140	-25.03	22	994	335
mmu-miR-30a-3p	NONMMUT141389.1	146	-25.03	146	-25.03	22	1366	816
mmu-miR-7023-5p	NONMMUT052500.2	155	-25.02	155	-25.02	23	2570	346
mmu-miR-7035-5p	NONMMUT052500.2	156	-25.02	156	-25.02	21	2570	47
mmu-miR-106b-3p	NONMMUT064235.2	282	-39.01	142	-25.02	22	3151	1 67
mmu-miR-7235-3p	NONMMUT064235.2	573	-78.07	148	-25.02	23	3151	2885 1462 1396 681
mmu-miR-7081-5p	NONMMUT046460.2	283	-42.31	143	-25.01	26	2478	338 416
mmu-miR-6392-5p	NONMMUT064235.2	150	-25	150	-25	23	3151	295
mmu-miR-6369	NONMMUT046460.2	168	-24.99	168	-24.99	23	2478	1319
mmu-miR-6537-5p	NONMMUT064235.2	148	-24.98	148	-24.98	22	3151	473
mmu-miR-466m-3p	NONMMUT046460.2	155	-24.98	155	-24.98	22	2478	1150
mmu-miR-6983-5p	NONMMUT052500.2	143	-24.97	143	-24.97	22	2570	300
mmu-miR-674-5p	NONMMUT052500.2	150	-24.97	150	-24.97	22	2570	309
mmu-miR-8120	NONMMUT064235.2	152	-24.97	152	-24.97	22	3151	2596
mmu-miR-294-3p	NONMMUT064235.2	314	-42.15	159	-24.96	22	3151	2026 2347
mmu-miR-3544-3p	NONMMUT064235.2	583	-85.38	151	-24.96	22	3151	995 896 2367 234
mmu-miR-7008-5p	NONMMUT141389.1	146	-24.95	146	-24.95	24	1366	665
mmu-miR-6952-5p	NONMMUT141389.1	149	-24.95	149	-24.95	22	1366	1218
mmu-miR-345-5p	NONMMUT064235.2	167	-24.95	167	-24.95	22	3151	841
mmu-miR-6977-5p	NONMMUT059456.2	141	-24.94	141	-24.94	25	994	683
mmu-miR-7041-5p	NONMMUT052500.2	449	-59.76	156	-24.94	23	2570	209 301 1852
mmu-miR-6971-5p	NONMMUT059456.2	143	-24.93	143	-24.93	20	994	740
mmu-miR-2137	NONMMUT059456.2	145	-24.92	145	-24.92	21	994	148
mmu-miR-12201-5p	NONMMUT049192.2	162	-24.9	162	-24.9	21	1011	701
mmu-miR-7215-3p	NONMMUT049192.2	141	-24.89	141	-24.89	23	1011	303
mmu-miR-6769b-5p	NONMMUT064235.2	157	-24.89	157	-24.89	20	3151	1930
mmu-miR-7068-5p	NONMMUT141389.1	157	-24.89	157	-24.89	21	1366	567
mmu-miR-1934-3p	NONMMUT052500.2	142	-24.88	142	-24.88	22	2570	143
mmu-miR-877-5p	NONMMUT064235.2	158	-24.88	158	-24.88	20	3151	904
mmu-miR-7051-5p	NONMMUT052500.2	294	-43.1	149	-24.87	22	2570	936 2522
mmu-miR-6911-5p	NONMMUT141389.1	140	-24.85	140	-24.85	23	1366	575
mmu-miR-7041-5p	NONMMUT064235.2	162	-24.85	162	-24.85	23	3151	1075
mmu-miR-7072-5p	NONMMUT046460.2	298	-48.73	157	-24.85	22	2478	582 550
mmu-miR-877-5p	NONMMUT052500.2	142	-24.84	142	-24.84	20	2570	2070
mmu-miR-7044-5p	NONMMUT064235.2	143	-24.84	143	-24.84	19	3151	1874
mmu-miR-193a-5p	NONMMUT064235.2	427	-61.75	144	-24.83	22	3151	1421 1259 2419
mmu-miR-7040-3p	NONMMUT064235.2	280	-40.42	140	-24.82	22	3151	874 1815
mmu-miR-6899-3p	NONMMUT064235.2	445	-68.05	155	-24.8	23	3151	2801 1289 650
mmu-miR-7045-5p	NONMMUT049192.2	143	-24.79	143	-24.79	21	1011	115
mmu-miR-344g-3p	NONMMUT064235.2	154	-24.79	154	-24.79	22	3151	2663
mmu-miR-693-3p	NONMMUT141389.1	157	-24.79	157	-24.79	23	1366	959
mmu-miR-6986-5p	NONMMUT059456.2	143	-24.77	143	-24.77	22	994	459
mmu-miR-7086-5p	NONMMUT059456.2	154	-24.77	154	-24.77	21	994	226
mmu-miR-27a-5p	NONMMUT049192.2	156	-24.77	156	-24.77	22	1011	375
mmu-miR-5133	NONMMUT052500.2	289	-48.22	145	-24.77	21	2570	1545 1360
mmu-miR-7676-3p	NONMMUT052500.2	142	-24.76	142	-24.76	22	2570	1123
mmu-miR-3089-3p	NONMMUT059456.2	149	-24.76	149	-24.76	23	994	361
mmu-miR-7677-5p	NONMMUT141389.1	152	-24.76	152	-24.76	25	1366	461
mmu-miR-665-3p	NONMMUT064235.2	298	-44.24	157	-24.76	20	3151	1821 1883
mmu-miR-6931-5p	NONMMUT141389.1	149	-24.75	149	-24.75	21	1366	138
mmu-miR-877-3p	NONMMUT059456.2	142	-24.74	142	-24.74	22	994	26
mmu-miR-3059-5p	NONMMUT052500.2	143	-24.74	143	-24.74	22	2570	1520
mmu-miR-6922-5p	NONMMUT049192.2	143	-24.74	143	-24.74	23	1011	330
mmu-miR-133c	NONMMUT049192.2	151	-24.73	151	-24.73	23	1011	772
mmu-miR-6959-5p	NONMMUT141389.1	152	-24.73	152	-24.73	23	1366	387
mmu-miR-1946a	NONMMUT064235.2	143	-24.72	143	-24.72	27	3151	215
mmu-miR-6965-5p	NONMMUT049192.2	140	-24.71	140	-24.71	24	1011	695
mmu-miR-6953-3p	NONMMUT049192.2	145	-24.71	145	-24.71	24	1011	735
mmu-miR-6916-5p	NONMMUT059456.2	155	-24.7	155	-24.7	21	994	893
mmu-miR-501-5p	NONMMUT046460.2	151	-24.69	151	-24.69	22	2478	1499
mmu-miR-6981-5p	NONMMUT046460.2	440	-69	154	-24.69	26	2478	339 191 417
mmu-miR-7240-5p	NONMMUT052500.2	145	-24.68	145	-24.68	21	2570	1670
mmu-miR-7666-3p	NONMMUT052500.2	141	-24.67	141	-24.67	19	2570	781
mmu-miR-449b	NONMMUT141389.1	142	-24.67	142	-24.67	20	1366	119
mmu-miR-883b-5p	NONMMUT052500.2	144	-24.67	144	-24.67	22	2570	307
mmu-miR-7042-5p	NONMMUT064235.2	165	-24.67	165	-24.67	21	3151	1699
mmu-miR-6935-5p	NONMMUT064235.2	290	-46.8	150	-24.67	22	3151	147 2543
mmu-miR-7072-5p	NONMMUT059456.2	153	-24.66	153	-24.66	22	994	738
mmu-miR-802-3p	NONMMUT059456.2	150	-24.64	150	-24.64	22	994	252
mmu-miR-6958-3p	NONMMUT064235.2	152	-24.63	152	-24.63	23	3151	2091
mmu-miR-194-2-3p	NONMMUT141389.1	298	-47.79	155	-24.63	22	1366	922 527
mmu-miR-6985-5p	NONMMUT064235.2	293	-46.52	151	-24.62	22	3151	65 2905
mmu-miR-6989-5p	NONMMUT049192.2	140	-24.61	140	-24.61	22	1011	66
mmu-miR-6947-3p	NONMMUT064235.2	149	-24.6	149	-24.6	22	3151	1957
mmu-miR-6985-5p	NONMMUT141389.1	284	-40	144	-24.6	22	1366	581 570
mmu-miR-6989-3p	NONMMUT064235.2	149	-24.59	149	-24.59	22	3151	667
mmu-miR-7066-5p	NONMMUT059456.2	150	-24.59	150	-24.59	22	994	215
mmu-miR-7016-5p	NONMMUT052500.2	281	-45.4	141	-24.58	21	2570	40 668
mmu-miR-294-5p	NONMMUT046460.2	284	-35.79	142	-24.58	22	2478	366 1293
mmu-miR-7045-5p	NONMMUT141389.1	140	-24.57	140	-24.57	21	1366	96
mmu-miR-7052-5p	NONMMUT046460.2	155	-24.54	155	-24.54	21	2478	219
mmu-miR-7011-3p	NONMMUT064235.2	145	-24.53	145	-24.53	21	3151	2089
mmu-miR-467d-3p	NONMMUT046460.2	140	-24.51	140	-24.51	22	2478	1153
mmu-miR-412-3p	NONMMUT064235.2	151	-24.5	151	-24.5	20	3151	650
mmu-miR-7671-3p	NONMMUT141389.1	142	-24.49	142	-24.49	22	1366	490
mmu-miR-6968-3p	NONMMUT052500.2	148	-24.47	148	-24.47	22	2570	929
mmu-miR-7656-3p	NONMMUT064235.2	157	-24.47	157	-24.47	22	3151	326
mmu-miR-1199-3p	NONMMUT049192.2	142	-24.44	142	-24.44	21	1011	580
mmu-miR-187-3p	NONMMUT141389.1	144	-24.44	144	-24.44	22	1366	908
mmu-miR-6357	NONMMUT064235.2	283	-37.03	143	-24.44	23	3151	1270 1
mmu-miR-127-5p	NONMMUT064235.2	158	-24.43	158	-24.43	22	3151	2187
mmu-miR-1224-5p	NONMMUT049192.2	140	-24.42	140	-24.42	21	1011	402
mmu-miR-7034-5p	NONMMUT064235.2	148	-24.42	148	-24.42	21	3151	532
mmu-miR-466i-5p	NONMMUT064235.2	161	-24.41	161	-24.41	20	3151	2601
mmu-miR-1843a-3p	NONMMUT064235.2	152	-24.4	152	-24.4	22	3151	1748
mmu-miR-1962	NONMMUT064235.2	465	-66.03	165	-24.4	22	3151	1685 1244 2889
mmu-miR-7235-5p	NONMMUT064235.2	149	-24.39	149	-24.39	18	3151	1107
mmu-miR-1894-3p	NONMMUT049192.2	142	-24.38	142	-24.38	22	1011	38
mmu-miR-3089-3p	NONMMUT141389.1	150	-24.38	150	-24.38	23	1366	790
mmu-miR-7016-3p	NONMMUT141389.1	145	-24.36	145	-24.36	22	1366	412
mmu-miR-18a-3p	NONMMUT049192.2	146	-24.34	146	-24.34	22	1011	161
mmu-miR-1930-5p	NONMMUT052500.2	151	-24.34	151	-24.34	22	2570	1511
mmu-miR-12194-3p	NONMMUT064235.2	292	-44.19	149	-24.34	22	3151	2542 2610
mmu-miR-7674-5p	NONMMUT064235.2	444	-67.98	151	-24.34	24	3151	2333 3103 2105
mmu-miR-7221-3p	NONMMUT059456.2	141	-24.33	141	-24.33	21	994	472
mmu-miR-7118-5p	NONMMUT052500.2	157	-24.33	157	-24.33	22	2570	1921
mmu-miR-9769-3p	NONMMUT064235.2	297	-44.63	150	-24.33	22	3151	918 2423
mmu-miR-6368	NONMMUT046460.2	314	-46.65	160	-24.32	21	2478	200 220
mmu-miR-6919-5p	NONMMUT141389.1	145	-24.31	145	-24.31	23	1366	102
mmu-miR-382-5p	NONMMUT049192.2	147	-24.31	147	-24.31	22	1011	525
mmu-miR-5130	NONMMUT059456.2	147	-24.29	147	-24.29	24	994	320
mmu-miR-6918-5p	NONMMUT064235.2	148	-24.25	148	-24.25	23	3151	2508
mmu-miR-675-5p	NONMMUT052500.2	142	-24.24	142	-24.24	22	2570	1436
mmu-miR-505-5p	NONMMUT059456.2	145	-24.24	145	-24.24	23	994	947
mmu-miR-7089-5p	NONMMUT059456.2	140	-24.22	140	-24.22	24	994	457
mmu-miR-7010-5p	NONMMUT064235.2	142	-24.21	142	-24.21	22	3151	1483
mmu-miR-7012-5p	NONMMUT052500.2	284	-40.19	144	-24.21	23	2570	2063 670
mmu-miR-6970-5p	NONMMUT064235.2	148	-24.2	148	-24.2	25	3151	2831
mmu-miR-17-3p	NONMMUT064235.2	585	-86.78	151	-24.2	22	3151	230 588 2061 2008
mmu-miR-7091-5p	NONMMUT052500.2	164	-24.19	164	-24.19	23	2570	1773
mmu-miR-6418-5p	NONMMUT046460.2	160	-24.18	160	-24.18	21	2478	588
mmu-miR-7030-5p	NONMMUT059456.2	148	-24.17	148	-24.17	22	994	737
mmu-miR-202-5p	NONMMUT064235.2	169	-24.17	169	-24.17	21	3151	741
mmu-miR-7085-3p	NONMMUT052500.2	144	-24.15	144	-24.15	22	2570	572
mmu-miR-6926-3p	NONMMUT049192.2	305	-41.51	163	-24.15	21	1011	224 271
mmu-miR-3089-3p	NONMMUT064235.2	312	-40.75	161	-24.15	23	3151	656 1669
mmu-miR-7003-5p	NONMMUT049192.2	144	-24.12	144	-24.12	21	1011	703
mmu-miR-3074-1-3p	NONMMUT046460.2	281	-46.87	141	-24.12	22	2478	1222 493
mmu-miR-6405	NONMMUT049192.2	299	-43.03	151	-24.12	23	1011	530 700
mmu-miR-3064-5p	NONMMUT141389.1	144	-24.1	144	-24.1	22	1366	441
mmu-miR-3088-3p	NONMMUT049192.2	144	-24.09	144	-24.09	23	1011	208
mmu-miR-3092-5p	NONMMUT049192.2	151	-24.09	151	-24.09	22	1011	827
mmu-miR-6961-5p	NONMMUT141389.1	151	-24.09	151	-24.09	20	1366	672
mmu-miR-1898	NONMMUT064235.2	147	-24.08	147	-24.08	22	3151	453
mmu-miR-7050-5p	NONMMUT052500.2	146	-24.04	146	-24.04	21	2570	2518
mmu-miR-770-5p	NONMMUT064235.2	153	-24.04	153	-24.04	22	3151	731
mmu-miR-6918-5p	NONMMUT046460.2	147	-24.03	147	-24.03	23	2478	2444
mmu-miR-8113	NONMMUT046460.2	159	-24.03	159	-24.03	22	2478	416
mmu-miR-201-3p	NONMMUT141389.1	160	-24.03	160	-24.03	23	1366	799
mmu-miR-7032-3p	NONMMUT049192.2	149	-24.01	149	-24.01	22	1011	603
mmu-miR-149-5p	NONMMUT064235.2	282	-41.14	142	-24.01	23	3151	506 1572
mmu-miR-344f-3p	NONMMUT064235.2	432	-62.1	147	-24.01	21	3151	1634 1228 178
mmu-miR-3089-3p	NONMMUT052500.2	141	-24	141	-24	23	2570	1527
mmu-miR-7224-3p	NONMMUT064235.2	160	-24	160	-24	21	3151	2462
mmu-miR-3473h-5p	NONMMUT064235.2	141	-23.99	141	-23.99	20	3151	1941
mmu-miR-7239-3p	NONMMUT141389.1	298	-40.71	155	-23.98	20	1366	1213 565
mmu-miR-503-5p	NONMMUT049192.2	151	-23.97	151	-23.97	23	1011	203
mmu-miR-6954-5p	NONMMUT049192.2	140	-23.96	140	-23.96	22	1011	125
mmu-miR-7036b-5p	NONMMUT049192.2	149	-23.96	149	-23.96	22	1011	379
mmu-miR-7009-5p	NONMMUT049192.2	141	-23.94	141	-23.94	22	1011	24
mmu-miR-6929-3p	NONMMUT052500.2	147	-23.94	147	-23.94	23	2570	1124
mmu-miR-487b-5p	NONMMUT052500.2	146	-23.9	146	-23.9	21	2570	2052
mmu-miR-6349	NONMMUT141389.1	151	-23.9	151	-23.9	22	1366	1244
mmu-miR-7009-3p	NONMMUT064235.2	591	-76.09	158	-23.9	21	3151	764 2293 621 723
mmu-miR-6404	NONMMUT052500.2	144	-23.89	144	-23.89	21	2570	1923
mmu-miR-7669-3p	NONMMUT052500.2	152	-23.89	152	-23.89	23	2570	44
mmu-miR-698-3p	NONMMUT064235.2	150	-23.88	150	-23.88	19	3151	123
mmu-miR-669k-5p	NONMMUT064235.2	288	-47.49	144	-23.88	25	3151	488 2604
mmu-miR-7677-5p	NONMMUT052500.2	140	-23.87	140	-23.87	25	2570	710
mmu-miR-7647-3p	NONMMUT064235.2	286	-42.46	143	-23.87	21	3151	1808 1909
mmu-miR-7030-5p	NONMMUT049192.2	291	-47.52	148	-23.85	22	1011	700 402
mmu-miR-6340	NONMMUT049192.2	144	-23.83	144	-23.83	23	1011	187
mmu-miR-6995-3p	NONMMUT064235.2	145	-23.81	145	-23.81	21	3151	602
mmu-miR-6990-3p	NONMMUT052500.2	154	-23.8	154	-23.8	21	2570	1144
mmu-miR-3110-3p	NONMMUT052500.2	157	-23.8	157	-23.8	22	2570	1320
mmu-miR-7087-5p	NONMMUT141389.1	155	-23.79	155	-23.79	21	1366	98
mmu-miR-7037-5p	NONMMUT052500.2	165	-23.79	165	-23.79	24	2570	112
mmu-miR-1899	NONMMUT046460.2	150	-23.77	150	-23.77	22	2478	1742
mmu-miR-302a-3p	NONMMUT064235.2	447	-62.5	159	-23.76	23	3151	2347 2026 2126
mmu-miR-466f	NONMMUT052500.2	142	-23.75	142	-23.75	22	2570	368
mmu-miR-12193-5p	NONMMUT052500.2	304	-44.09	154	-23.75	22	2570	954 906
mmu-miR-485-5p	NONMMUT064235.2	455	-66.59	157	-23.75	22	3151	1684 2888 1246
mmu-miR-6546-5p	NONMMUT064235.2	142	-23.74	142	-23.74	24	3151	719
mmu-miR-1906	NONMMUT064235.2	437	-66.6	150	-23.72	22	3151	265 1694 2057
mmu-miR-6923-3p	NONMMUT064235.2	146	-23.71	146	-23.71	21	3151	871
mmu-miR-6952-3p	NONMMUT064235.2	140	-23.69	140	-23.69	22	3151	628
mmu-miR-6715-5p	NONMMUT064235.2	140	-23.69	140	-23.69	23	3151	9
mmu-miR-7004-5p	NONMMUT052500.2	151	-23.69	151	-23.69	24	2570	246
mmu-miR-346-5p	NONMMUT064235.2	441	-60.28	151	-23.69	23	3151	1019 1160 2355
mmu-miR-6975-5p	NONMMUT059456.2	148	-23.68	148	-23.68	23	994	768
mmu-miR-6399	NONMMUT064235.2	291	-45.67	150	-23.68	22	3151	1439 68
mmu-miR-6941-5p	NONMMUT049192.2	154	-23.67	154	-23.67	21	1011	407
mmu-miR-3091-3p	NONMMUT046460.2	148	-23.66	148	-23.66	22	2478	460
mmu-miR-490-3p	NONMMUT052500.2	142	-23.62	142	-23.62	22	2570	1331
mmu-miR-7067-5p	NONMMUT046460.2	145	-23.62	145	-23.62	23	2478	585
mmu-miR-7066-5p	NONMMUT049192.2	146	-23.62	146	-23.62	22	1011	519
mmu-miR-3064-5p	NONMMUT052500.2	151	-23.62	151	-23.62	22	2570	288
mmu-miR-8119	NONMMUT046460.2	152	-23.62	152	-23.62	20	2478	422
mmu-miR-7659-5p	NONMMUT049192.2	282	-42.68	142	-23.6	22	1011	254 478
mmu-miR-497b	NONMMUT052500.2	142	-23.59	142	-23.59	24	2570	2352
mmu-miR-500-5p	NONMMUT141389.1	145	-23.59	145	-23.59	25	1366	217
mmu-miR-423-5p	NONMMUT059456.2	146	-23.59	146	-23.59	23	994	124
mmu-miR-6407	NONMMUT141389.1	159	-23.58	159	-23.58	23	1366	1200
mmu-miR-1970c-5p	NONMMUT064235.2	298	-42.36	158	-23.57	23	3151	393 2450
mmu-miR-6934-3p	NONMMUT064235.2	446	-61.69	158	-23.56	22	3151	77 2359 1623
mmu-miR-344d-3-5p	NONMMUT064235.2	144	-23.55	144	-23.55	23	3151	371
mmu-miR-324-5p	NONMMUT064235.2	149	-23.53	149	-23.53	23	3151	1708
mmu-miR-7668-3p	NONMMUT052500.2	155	-23.53	155	-23.53	22	2570	777
mmu-miR-7684-5p	NONMMUT049192.2	282	-42.76	142	-23.52	21	1011	532 626
mmu-miR-103-1-5p	NONMMUT141389.1	147	-23.51	147	-23.51	23	1366	326
mmu-let-7f-2-3p	NONMMUT064235.2	300	-34.68	158	-23.51	21	3151	1343 2733
mmu-miR-6965-3p	NONMMUT064235.2	284	-37.78	143	-23.49	22	3151	689 1773
mmu-miR-7008-3p	NONMMUT052500.2	290	-43.41	146	-23.49	22	2570	2027 1366
mmu-let-7j	NONMMUT046460.2	294	-35.41	148	-23.48	24	2478	66 1910
mmu-miR-7001-3p	NONMMUT064235.2	160	-23.47	160	-23.47	20	3151	641
mmu-miR-6960-3p	NONMMUT059456.2	160	-23.46	160	-23.46	22	994	588
mmu-miR-8111	NONMMUT059456.2	287	-43.3	147	-23.46	21	994	943 280
mmu-miR-6935-3p	NONMMUT052500.2	140	-23.45	140	-23.45	20	2570	1707
mmu-miR-3079-5p	NONMMUT059456.2	142	-23.45	142	-23.45	23	994	478
mmu-miR-497a-5p	NONMMUT064235.2	156	-23.44	156	-23.44	22	3151	3027
mmu-miR-344d-1-5p	NONMMUT052500.2	296	-43.44	149	-23.44	24	2570	1347 1155
mmu-miR-5626-5p	NONMMUT049192.2	143	-23.42	143	-23.42	22	1011	631
mmu-miR-7046-5p	NONMMUT059456.2	147	-23.41	147	-23.41	24	994	538
mmu-miR-103-2-5p	NONMMUT141389.1	147	-23.4	147	-23.4	23	1366	326
mmu-miR-292a-3p	NONMMUT064235.2	165	-23.4	165	-23.4	24	3151	2125
mmu-miR-1903	NONMMUT059456.2	286	-37.09	143	-23.39	22	994	362 388
mmu-miR-296-3p	NONMMUT064235.2	288	-39.59	148	-23.39	22	3151	1144 3115
mmu-miR-12187-5p	NONMMUT046460.2	140	-23.38	140	-23.38	22	2478	583
mmu-miR-3082-5p	NONMMUT064235.2	143	-23.38	143	-23.38	22	3151	314
mmu-miR-92a-1-5p	NONMMUT141389.1	140	-23.37	140	-23.37	23	1366	694
mmu-miR-6966-5p	NONMMUT049192.2	144	-23.36	144	-23.36	21	1011	32
mmu-miR-7047-3p	NONMMUT049192.2	141	-23.35	141	-23.35	23	1011	817
mmu-miR-298-5p	NONMMUT052500.2	291	-44.78	151	-23.35	23	2570	112 692
mmu-miR-6405	NONMMUT046460.2	310	-43.78	156	-23.35	23	2478	219 198
mmu-miR-6942-5p	NONMMUT052500.2	440	-66.59	153	-23.35	21	2570	1831 303 2067
mmu-miR-7652-5p	NONMMUT052500.2	445	-62	153	-23.35	22	2570	1795 295 1494
mmu-miR-7000-5p	NONMMUT064235.2	155	-23.34	155	-23.34	22	3151	189
mmu-miR-6907-3p	NONMMUT052500.2	145	-23.33	145	-23.33	23	2570	368
mmu-miR-6925-5p	NONMMUT064235.2	287	-38.2	147	-23.33	22	3151	952 251
mmu-miR-1970	NONMMUT064235.2	150	-23.32	150	-23.32	23	3151	393
mmu-miR-6906-5p	NONMMUT049192.2	141	-23.31	141	-23.31	24	1011	24
mmu-miR-6927-3p	NONMMUT046460.2	144	-23.3	144	-23.3	21	2478	2104
mmu-miR-7216-5p	NONMMUT046460.2	148	-23.3	148	-23.3	24	2478	418
mmu-miR-7662-5p	NONMMUT059456.2	140	-23.29	140	-23.29	22	994	744
mmu-miR-8092	NONMMUT052500.2	140	-23.28	140	-23.28	21	2570	415
mmu-miR-7018-5p	NONMMUT049192.2	152	-23.28	152	-23.28	24	1011	204
mmu-miR-466f-5p	NONMMUT052500.2	147	-23.27	147	-23.27	22	2570	369
mmu-miR-540-5p	NONMMUT064235.2	148	-23.27	148	-23.27	23	3151	1473
mmu-miR-7676-5p	NONMMUT141389.1	140	-23.26	140	-23.26	23	1366	116
mmu-miR-1668	NONMMUT141389.1	142	-23.26	142	-23.26	21	1366	651
mmu-miR-702-5p	NONMMUT046460.2	151	-23.26	151	-23.26	21	2478	234
mmu-miR-7669-5p	NONMMUT064235.2	432	-50.36	149	-23.25	23	3151	2329 1048 2097
mmu-miR-1894-3p	NONMMUT141389.1	296	-45.35	151	-23.24	22	1366	933 852
mmu-miR-330-5p	NONMMUT059456.2	159	-23.23	159	-23.23	22	994	643
mmu-miR-5113	NONMMUT059456.2	159	-23.23	159	-23.23	23	994	601
mmu-miR-466e-5p	NONMMUT046460.2	454	-56.53	160	-23.23	22	2478	1160 285 2454
mmu-miR-7025-5p	NONMMUT064235.2	740	-107.66	152	-23.23	24	3151	1593 2964 31 582 1727
mmu-miR-5134-5p	NONMMUT059456.2	144	-23.22	144	-23.22	21	994	279
mmu-miR-5113	NONMMUT052500.2	280	-38.41	140	-23.21	23	2570	1833 2307
mmu-miR-504-3p	NONMMUT046460.2	148	-23.2	148	-23.2	22	2478	420
mmu-miR-6964-5p	NONMMUT064235.2	431	-58.3	147	-23.2	21	3151	1926 1113 275
mmu-miR-874-3p	NONMMUT052500.2	140	-23.19	140	-23.19	22	2570	1146
mmu-miR-466q	NONMMUT046460.2	141	-23.18	141	-23.18	20	2478	1157
mmu-miR-466f-3p	NONMMUT046460.2	303	-32.02	154	-23.18	21	2478	1153 2154
mmu-miR-186-3p	NONMMUT052500.2	140	-23.17	140	-23.17	22	2570	860
mmu-miR-1970c-3p	NONMMUT059456.2	151	-23.16	151	-23.16	22	994	944
mmu-miR-7076-3p	NONMMUT046460.2	151	-23.14	151	-23.14	21	2478	390
mmu-miR-210-3p	NONMMUT052500.2	144	-23.13	144	-23.13	22	2570	430
mmu-miR-6979-3p	NONMMUT052500.2	289	-38.2	149	-23.13	21	2570	229 2551
mmu-miR-6919-3p	NONMMUT052500.2	292	-39.82	152	-23.12	21	2570	558 2015
mmu-miR-6933-5p	NONMMUT141389.1	146	-23.11	146	-23.11	22	1366	201
mmu-miR-18a-3p	NONMMUT052500.2	141	-23.1	141	-23.1	22	2570	1149
mmu-miR-6901-5p	NONMMUT052500.2	148	-23.1	148	-23.1	20	2570	2222
mmu-miR-6971-5p	NONMMUT141389.1	142	-23.09	142	-23.09	20	1366	666
mmu-miR-7059-5p	NONMMUT059456.2	142	-23.09	142	-23.09	22	994	748
mmu-miR-7094-3p	NONMMUT049192.2	144	-23.09	144	-23.09	21	1011	613
mmu-miR-8093	NONMMUT052500.2	290	-45.25	146	-23.09	21	2570	37 438
mmu-miR-7075-5p	NONMMUT049192.2	152	-23.08	152	-23.08	21	1011	404
mmu-miR-7689-3p	NONMMUT049192.2	140	-23.07	140	-23.07	23	1011	298
mmu-let-7b-5p	NONMMUT052500.2	142	-23.07	142	-23.07	22	2570	343
mmu-miR-674-5p	NONMMUT059456.2	142	-23.07	142	-23.07	22	994	444
mmu-miR-34b-5p	NONMMUT141389.1	144	-23.07	144	-23.07	23	1366	239
mmu-miR-7036b-5p	NONMMUT141389.1	146	-23.07	146	-23.07	22	1366	355
mmu-miR-8092	NONMMUT049192.2	155	-23.07	155	-23.07	21	1011	630
mmu-miR-712-3p	NONMMUT046460.2	140	-23.06	140	-23.06	22	2478	414
mmu-miR-669e-5p	NONMMUT064235.2	150	-23.06	150	-23.06	22	3151	2595
mmu-miR-1904	NONMMUT064235.2	441	-50.26	151	-23.06	22	3151	1622 1322 2284
mmu-miR-1966-5p	NONMMUT059456.2	141	-23.04	141	-23.04	25	994	943
mmu-miR-296-3p	NONMMUT046460.2	143	-23.04	143	-23.04	22	2478	240
mmu-miR-7036b-3p	NONMMUT052500.2	144	-23.04	144	-23.04	22	2570	19
mmu-miR-3075-3p	NONMMUT064235.2	297	-38.68	153	-23.04	21	3151	2162 943
mmu-miR-7003-3p	NONMMUT049192.2	147	-23.03	147	-23.03	19	1011	104
mmu-miR-449c-5p	NONMMUT141389.1	142	-23.02	142	-23.02	21	1366	246
mmu-miR-8100	NONMMUT046460.2	306	-45.8	164	-23.02	23	2478	338 578
mmu-miR-7051-3p	NONMMUT052500.2	151	-23.01	151	-23.01	22	2570	2276
mmu-miR-6996-3p	NONMMUT052500.2	434	-57.36	147	-23.01	23	2570	1393 2550 830
mmu-miR-196a-5p	NONMMUT052500.2	143	-23	143	-23	22	2570	340
mmu-miR-17-5p	NONMMUT064235.2	159	-22.99	159	-22.99	23	3151	2349
mmu-miR-1947-5p	NONMMUT064235.2	159	-22.99	159	-22.99	22	3151	255
mmu-miR-1911-3p	NONMMUT141389.1	141	-22.98	141	-22.98	22	1366	588
mmu-miR-7008-5p	NONMMUT052500.2	151	-22.98	151	-22.98	24	2570	99
mmu-miR-328-5p	NONMMUT064235.2	140	-22.96	140	-22.96	22	3151	142
mmu-miR-8104	NONMMUT049192.2	140	-22.96	140	-22.96	22	1011	399
mmu-miR-7659-3p	NONMMUT052500.2	148	-22.96	148	-22.96	23	2570	1548
mmu-miR-323-5p	NONMMUT046460.2	151	-22.96	151	-22.96	22	2478	917
mmu-miR-7018-5p	NONMMUT064235.2	140	-22.95	140	-22.95	24	3151	2992
mmu-miR-205-5p	NONMMUT064235.2	148	-22.94	148	-22.94	22	3151	837
mmu-miR-138-5p	NONMMUT064235.2	150	-22.94	150	-22.94	23	3151	1929
mmu-miR-3091-3p	NONMMUT141389.1	294	-44.54	150	-22.94	22	1366	915 948
mmu-miR-5128	NONMMUT052500.2	142	-22.93	142	-22.93	23	2570	1287
mmu-miR-12193-5p	NONMMUT049192.2	144	-22.93	144	-22.93	22	1011	760
mmu-miR-7017-3p	NONMMUT064235.2	147	-22.9	147	-22.9	21	3151	1719
mmu-miR-18a-3p	NONMMUT064235.2	308	-38.33	164	-22.89	22	3151	2357 75
mmu-miR-7227-3p	NONMMUT052500.2	160	-22.88	160	-22.88	22	2570	1929
mmu-miR-7237-3p	NONMMUT064235.2	143	-22.86	143	-22.86	22	3151	2697
mmu-miR-7091-3p	NONMMUT052500.2	149	-22.86	149	-22.86	21	2570	205
mmu-miR-7036a-5p	NONMMUT052500.2	151	-22.85	151	-22.85	23	2570	324
mmu-miR-7649-3p	NONMMUT064235.2	154	-22.85	154	-22.85	23	3151	662
mmu-miR-7656-3p	NONMMUT141389.1	157	-22.85	157	-22.85	22	1366	1203
mmu-miR-6367	NONMMUT049192.2	300	-44.13	155	-22.85	22	1011	302 809
mmu-miR-5129-5p	NONMMUT064235.2	444	-64.03	149	-22.85	22	3151	2546 145 1939
mmu-miR-12180-3p	NONMMUT049192.2	140	-22.84	140	-22.84	18	1011	482
mmu-miR-696	NONMMUT064235.2	284	-44.23	142	-22.84	18	3151	497 2614
mmu-miR-5621-3p	NONMMUT049192.2	140	-22.83	140	-22.83	21	1011	307
mmu-miR-6348	NONMMUT046460.2	144	-22.83	144	-22.83	22	2478	747
mmu-miR-5617-3p	NONMMUT141389.1	146	-22.83	146	-22.83	21	1366	200
mmu-miR-5046	NONMMUT052500.2	156	-22.83	156	-22.83	24	2570	388
mmu-miR-466m-3p	NONMMUT052500.2	470	-46.49	180	-22.83	22	2570	2400 2197 2416
mmu-miR-6955-3p	NONMMUT064235.2	150	-22.82	150	-22.82	22	3151	647
mmu-miR-466o-3p	NONMMUT052500.2	488	-50.49	183	-22.82	22	2570	2396 2197 2412
mmu-miR-466d-5p	NONMMUT046460.2	303	-43.4	163	-22.81	22	2478	285 1158
mmu-miR-1943-3p	NONMMUT064235.2	446	-60.51	156	-22.81	21	3151	85 2099 362
mmu-miR-7066-5p	NONMMUT046460.2	147	-22.8	147	-22.8	22	2478	244
mmu-miR-21a-3p	NONMMUT052500.2	287	-43.09	144	-22.8	22	2570	1507 1733
mmu-miR-7067-5p	NONMMUT064235.2	145	-22.79	145	-22.79	23	3151	2053
mmu-miR-466a-5p	NONMMUT046460.2	454	-55.34	160	-22.79	22	2478	1160 285 2454
mmu-miR-743b-5p	NONMMUT046460.2	141	-22.78	141	-22.78	21	2478	1379
mmu-miR-467f	NONMMUT046460.2	293	-34.8	150	-22.77	21	2478	2153 1148
mmu-miR-3971	NONMMUT141389.1	309	-44.46	155	-22.77	22	1366	153 80
mmu-miR-7050-3p	NONMMUT064235.2	141	-22.76	141	-22.76	21	3151	1753
mmu-miR-6980-3p	NONMMUT141389.1	149	-22.76	149	-22.76	20	1366	287
mmu-miR-491-5p	NONMMUT064235.2	140	-22.75	140	-22.75	22	3151	2054
mmu-miR-221-3p	NONMMUT052500.2	140	-22.71	140	-22.71	23	2570	1108
mmu-let-7a-2-3p	NONMMUT064235.2	305	-35.81	155	-22.7	21	3151	2735 1383
mmu-miR-12197-3p	NONMMUT049192.2	140	-22.69	140	-22.69	18	1011	382
mmu-miR-6237	NONMMUT046460.2	141	-22.69	141	-22.69	23	2478	2443
mmu-miR-7003-3p	NONMMUT059456.2	141	-22.69	141	-22.69	19	994	58
mmu-miR-12179-5p	NONMMUT064235.2	427	-64.36	144	-22.69	19	3151	2362 78 2808
mmu-miR-7038-5p	NONMMUT052500.2	140	-22.68	140	-22.68	22	2570	1594
mmu-miR-7221-5p	NONMMUT064235.2	282	-42.94	142	-22.68	21	3151	1419 1958
mmu-miR-12185-3p	NONMMUT052500.2	304	-38.31	156	-22.68	22	2570	2276 1209
mmu-miR-6954-3p	NONMMUT064235.2	140	-22.66	140	-22.66	21	3151	558
mmu-miR-7070-5p	NONMMUT141389.1	144	-22.65	144	-22.65	21	1366	89
mmu-miR-6990-3p	NONMMUT064235.2	287	-45.25	147	-22.65	21	3151	67 1725
mmu-miR-3072-3p	NONMMUT049192.2	142	-22.64	142	-22.64	22	1011	692
mmu-miR-7056-5p	NONMMUT052500.2	140	-22.63	140	-22.63	22	2570	1601
mmu-miR-370-3p	NONMMUT064235.2	142	-22.63	142	-22.63	22	3151	1721
mmu-miR-6921-5p	NONMMUT141389.1	142	-22.62	142	-22.62	22	1366	663
mmu-miR-297b-3p	NONMMUT046460.2	144	-22.62	144	-22.62	22	2478	1154
mmu-miR-297a-3p	NONMMUT046460.2	144	-22.62	144	-22.62	22	2478	1154
mmu-miR-297c-3p	NONMMUT046460.2	144	-22.62	144	-22.62	22	2478	1154
mmu-miR-199a-3p	NONMMUT046460.2	144	-22.61	144	-22.61	22	2478	1215
mmu-miR-199b-3p	NONMMUT046460.2	144	-22.61	144	-22.61	22	2478	1215
mmu-miR-6939-5p	NONMMUT064235.2	144	-22.6	144	-22.6	21	3151	1698
mmu-miR-6958-5p	NONMMUT064235.2	145	-22.6	145	-22.6	22	3151	528
mmu-miR-7578	NONMMUT141389.1	290	-43.12	145	-22.6	24	1366	741 999
mmu-miR-5623-5p	NONMMUT052500.2	158	-22.59	158	-22.59	24	2570	990
mmu-miR-6944-3p	NONMMUT059456.2	152	-22.58	152	-22.58	23	994	856
mmu-miR-3552	NONMMUT059456.2	146	-22.57	146	-22.57	21	994	733
mmu-miR-6998-3p	NONMMUT064235.2	144	-22.54	144	-22.54	22	3151	2092
mmu-miR-6946-5p	NONMMUT046460.2	161	-22.54	161	-22.54	21	2478	970
mmu-miR-7033-3p	NONMMUT064235.2	145	-22.53	145	-22.53	21	3151	387
mmu-miR-204-3p	NONMMUT064235.2	146	-22.53	146	-22.53	21	3151	1999
mmu-miR-6418-3p	NONMMUT064235.2	149	-22.52	149	-22.52	22	3151	559
mmu-miR-7041-3p	NONMMUT064235.2	142	-22.5	142	-22.5	20	3151	2814
mmu-miR-6995-5p	NONMMUT141389.1	152	-22.5	152	-22.5	23	1366	552
mmu-miR-196b-5p	NONMMUT052500.2	143	-22.49	143	-22.49	22	2570	340
mmu-miR-7021-3p	NONMMUT049192.2	145	-22.49	145	-22.49	22	1011	612
mmu-miR-344d-3-5p	NONMMUT059456.2	148	-22.49	148	-22.49	23	994	942
mmu-miR-302c-3p	NONMMUT052500.2	141	-22.48	141	-22.48	22	2570	1363
mmu-miR-7002-5p	NONMMUT064235.2	284	-38.38	142	-22.48	21	3151	2317 2910
mmu-miR-6928-5p	NONMMUT059456.2	144	-22.47	144	-22.47	23	994	744
mmu-miR-9718	NONMMUT052500.2	148	-22.46	148	-22.46	20	2570	376
mmu-miR-7049-5p	NONMMUT052500.2	154	-22.46	154	-22.46	23	2570	1572
mmu-miR-6949-3p	NONMMUT064235.2	162	-22.46	162	-22.46	21	3151	2022
mmu-miR-7211-5p	NONMMUT052500.2	143	-22.45	143	-22.45	22	2570	1519
mmu-miR-351-3p	NONMMUT059456.2	145	-22.45	145	-22.45	21	994	954
mmu-miR-204-5p	NONMMUT049192.2	143	-22.44	143	-22.44	22	1011	614
mmu-miR-6934-3p	NONMMUT049192.2	153	-22.44	153	-22.44	22	1011	613
mmu-miR-31-3p	NONMMUT046460.2	281	-35.53	141	-22.44	23	2478	397 2040
mmu-miR-486a-3p	NONMMUT064235.2	281	-38.79	141	-22.44	21	3151	141 1413
mmu-miR-486b-3p	NONMMUT064235.2	281	-37.74	141	-22.44	20	3151	142 1414
mmu-miR-1966-3p	NONMMUT064235.2	140	-22.43	140	-22.43	23	3151	678
mmu-miR-7068-5p	NONMMUT064235.2	153	-22.43	153	-22.43	21	3151	2190
mmu-miR-6971-3p	NONMMUT046460.2	299	-39.35	157	-22.43	21	2478	2072 2412
mmu-miR-1193-3p	NONMMUT064235.2	145	-22.4	145	-22.4	21	3151	876
mmu-miR-451b	NONMMUT064235.2	294	-42.5	151	-22.4	21	3151	143 1101
mmu-miR-6928-3p	NONMMUT064235.2	295	-38.58	155	-22.4	22	3151	1209 2093
mmu-miR-6926-5p	NONMMUT141389.1	145	-22.39	145	-22.39	22	1366	924
mmu-miR-7020-3p	NONMMUT064235.2	284	-37.98	143	-22.39	21	3151	840 615
mmu-miR-7231-3p	NONMMUT052500.2	144	-22.38	144	-22.38	23	2570	1521
mmu-miR-7094b-2-5p	NONMMUT059456.2	155	-22.38	155	-22.38	23	994	770
mmu-miR-12201-3p	NONMMUT052500.2	155	-22.37	155	-22.37	21	2570	121
mmu-miR-3074-5p	NONMMUT064235.2	592	-82.82	157	-22.36	22	3151	540 232 994 2288
mmu-miR-6971-5p	NONMMUT046460.2	142	-22.33	142	-22.33	20	2478	345
mmu-miR-770-5p	NONMMUT059456.2	151	-22.33	151	-22.33	22	994	19
mmu-miR-12182-5p	NONMMUT049192.2	298	-41.86	150	-22.33	22	1011	153 781
mmu-miR-323-5p	NONMMUT059456.2	141	-22.32	141	-22.32	22	994	523
mmu-miR-92a-1-5p	NONMMUT049192.2	147	-22.31	147	-22.31	23	1011	514
mmu-miR-7006-5p	NONMMUT064235.2	145	-22.3	145	-22.3	25	3151	3102
mmu-miR-6950-5p	NONMMUT059456.2	146	-22.3	146	-22.3	23	994	770
mmu-miR-7000-5p	NONMMUT049192.2	148	-22.29	148	-22.29	22	1011	66
mmu-miR-1963	NONMMUT064235.2	141	-22.28	141	-22.28	23	3151	524
mmu-miR-6997-5p	NONMMUT141389.1	158	-22.28	158	-22.28	22	1366	1202
mmu-miR-106a-3p	NONMMUT064235.2	298	-41.77	156	-22.28	23	3151	232 587
mmu-miR-7064-5p	NONMMUT064235.2	302	-39.42	157	-22.28	24	3151	1985 1246
mmu-miR-34a-5p	NONMMUT064235.2	448	-53.9	160	-22.28	22	3151	1970 1413 1353
mmu-miR-8100	NONMMUT052500.2	444	-59.74	152	-22.26	23	2570	1828 1570 1865
mmu-miR-146b-3p	NONMMUT064235.2	146	-22.25	146	-22.25	22	3151	1527
mmu-miR-125a-3p	NONMMUT141389.1	150	-22.25	150	-22.25	22	1366	94
mmu-miR-1906	NONMMUT052500.2	284	-40.53	143	-22.25	22	2570	1505 478
mmu-miR-466b-5p	NONMMUT046460.2	288	-44.13	144	-22.25	22	2478	286 1161
mmu-miR-466o-5p	NONMMUT046460.2	288	-44.13	144	-22.25	22	2478	286 1161
mmu-miR-6404	NONMMUT046460.2	306	-41	153	-22.25	21	2478	199 218
mmu-miR-9768-3p	NONMMUT141389.1	142	-22.23	142	-22.23	24	1366	408
mmu-miR-1955-5p	NONMMUT059456.2	143	-22.23	143	-22.23	25	994	721
mmu-miR-301a-5p	NONMMUT052500.2	148	-22.22	148	-22.22	22	2570	2337
mmu-miR-6377	NONMMUT064235.2	288	-42.82	147	-22.22	23	3151	657 744
mmu-miR-7047-5p	NONMMUT064235.2	145	-22.21	145	-22.21	23	3151	1102
mmu-miR-3966	NONMMUT064235.2	281	-41.7	141	-22.21	21	3151	751 1252
mmu-miR-7012-5p	NONMMUT059456.2	140	-22.2	140	-22.2	23	994	969
mmu-miR-7033-5p	NONMMUT141389.1	140	-22.2	140	-22.2	23	1366	210
mmu-miR-3070-5p	NONMMUT141389.1	142	-22.2	142	-22.2	23	1366	1187
mmu-miR-742-3p	NONMMUT052500.2	159	-22.2	159	-22.2	22	2570	2357
mmu-miR-760-3p	NONMMUT059456.2	143	-22.19	143	-22.19	20	994	649
mmu-miR-665-3p	NONMMUT059456.2	298	-42.27	154	-22.19	20	994	568 909
mmu-miR-410-5p	NONMMUT141389.1	143	-22.17	143	-22.17	21	1366	1202
mmu-miR-211-5p	NONMMUT049192.2	145	-22.17	145	-22.17	22	1011	614
mmu-miR-7025-5p	NONMMUT059456.2	146	-22.16	146	-22.16	24	994	471
mmu-miR-6906-5p	NONMMUT052500.2	285	-42.95	143	-22.16	24	2570	994 1
mmu-miR-6990-5p	NONMMUT046460.2	145	-22.15	145	-22.15	21	2478	870
mmu-let-7j	NONMMUT064235.2	146	-22.12	146	-22.12	24	3151	62
mmu-miR-5627-3p	NONMMUT064235.2	149	-22.12	149	-22.12	24	3151	926
mmu-miR-1258-5p	NONMMUT064235.2	164	-22.12	164	-22.12	22	3151	129
mmu-miR-466f	NONMMUT046460.2	152	-22.11	152	-22.11	22	2478	284
mmu-miR-7661-3p	NONMMUT046460.2	157	-22.11	157	-22.11	22	2478	2221
mmu-miR-7037-3p	NONMMUT064235.2	431	-52.59	149	-22.11	22	3151	111 705 1419
mmu-miR-12188-5p	NONMMUT052500.2	168	-22.1	168	-22.1	24	2570	1013
mmu-miR-504-3p	NONMMUT064235.2	292	-43.95	150	-22.1	22	3151	1102 499
mmu-miR-8109	NONMMUT141389.1	141	-22.09	141	-22.09	21	1366	521
mmu-miR-6936-5p	NONMMUT059456.2	148	-22.09	148	-22.09	21	994	472
mmu-miR-3087-3p	NONMMUT064235.2	308	-38.76	159	-22.09	21	3151	977 1028
mmu-miR-344b-5p	NONMMUT052500.2	141	-22.08	141	-22.08	23	2570	1346
mmu-miR-6963-3p	NONMMUT064235.2	436	-63.77	156	-22.07	23	3151	1954 726 865
mmu-miR-5623-5p	NONMMUT049192.2	143	-22.06	143	-22.06	24	1011	788
mmu-miR-1938	NONMMUT052500.2	155	-22.06	155	-22.06	22	2570	106
mmu-miR-92a-1-5p	NONMMUT059456.2	292	-43.71	151	-22.06	23	994	212 160
mmu-miR-6991-3p	NONMMUT064235.2	311	-42.6	157	-22.06	22	3151	1037 632
mmu-miR-6967-5p	NONMMUT064235.2	140	-22.05	140	-22.05	21	3151	1479
mmu-miR-7028-3p	NONMMUT064235.2	283	-34.58	143	-22.05	22	3151	702 1617
mmu-miR-6400	NONMMUT064235.2	313	-43.13	164	-22.05	21	3151	1615 1323
mmu-miR-6962-3p	NONMMUT064235.2	427	-59.85	144	-22.05	22	3151	75 1017 657
mmu-miR-7034-3p	NONMMUT064235.2	438	-53.84	149	-22.05	24	3151	91 2880 2400
mmu-miR-7001-5p	NONMMUT052500.2	145	-22.04	145	-22.04	23	2570	1555
mmu-miR-7654-3p	NONMMUT059456.2	140	-22.03	140	-22.03	22	994	319
mmu-miR-7055-5p	NONMMUT141389.1	149	-22.03	149	-22.03	21	1366	926
mmu-miR-7073-5p	NONMMUT049192.2	148	-22.02	148	-22.02	22	1011	830
mmu-miR-3098-3p	NONMMUT141389.1	152	-22.02	152	-22.02	21	1366	344
mmu-miR-702-5p	NONMMUT064235.2	142	-22.01	142	-22.01	21	3151	2459
mmu-miR-27a-5p	NONMMUT059456.2	145	-21.99	145	-21.99	22	994	671
mmu-miR-7657-3p	NONMMUT064235.2	160	-21.99	160	-21.99	23	3151	589
mmu-miR-669d-5p	NONMMUT064235.2	438	-59.9	148	-21.97	22	3151	1287 2602 356
mmu-miR-877-5p	NONMMUT046460.2	153	-21.96	153	-21.96	20	2478	882
mmu-miR-6978-5p	NONMMUT064235.2	148	-21.95	148	-21.95	23	3151	272
mmu-miR-6917-3p	NONMMUT046460.2	149	-21.95	149	-21.95	22	2478	2072
mmu-miR-6979-5p	NONMMUT052500.2	141	-21.94	141	-21.94	20	2570	346
mmu-miR-6908-5p	NONMMUT052500.2	146	-21.94	146	-21.94	22	2570	831
mmu-miR-200b-5p	NONMMUT064235.2	152	-21.94	152	-21.94	22	3151	2741
mmu-miR-6391	NONMMUT064235.2	156	-21.94	156	-21.94	21	3151	1987
mmu-miR-7659-3p	NONMMUT059456.2	145	-21.93	145	-21.93	23	994	561
mmu-miR-152-5p	NONMMUT064235.2	140	-21.92	140	-21.92	24	3151	2811
mmu-miR-1945	NONMMUT141389.1	141	-21.92	141	-21.92	22	1366	359
mmu-miR-3075-3p	NONMMUT052500.2	287	-43.26	147	-21.92	21	2570	1302 2233
mmu-miR-6953-5p	NONMMUT052500.2	140	-21.9	140	-21.9	26	2570	159
mmu-miR-12186-3p	NONMMUT052500.2	145	-21.9	145	-21.9	21	2570	1527
mmu-miR-6356	NONMMUT049192.2	152	-21.9	152	-21.9	21	1011	312
mmu-miR-6915-5p	NONMMUT059456.2	155	-21.9	155	-21.9	24	994	517
mmu-miR-7021-3p	NONMMUT052500.2	285	-42.97	144	-21.9	22	2570	263 2262
mmu-miR-292b-5p	NONMMUT052500.2	288	-37.54	145	-21.89	23	2570	2376 639
mmu-miR-541-5p	NONMMUT141389.1	442	-53.18	154	-21.89	25	1366	1299 348 929
mmu-miR-7094b-2-5p	NONMMUT064235.2	152	-21.88	152	-21.88	23	3151	500
mmu-miR-1951	NONMMUT141389.1	143	-21.87	143	-21.87	22	1366	528
mmu-miR-7038-5p	NONMMUT046460.2	165	-21.87	165	-21.87	22	2478	1709
mmu-miR-6935-5p	NONMMUT052500.2	144	-21.85	144	-21.85	22	2570	102
mmu-miR-7664-5p	NONMMUT059456.2	146	-21.84	146	-21.84	21	994	862
mmu-miR-126b-5p	NONMMUT046460.2	154	-21.84	154	-21.84	22	2478	1057
mmu-miR-466o-3p	NONMMUT046460.2	158	-21.83	158	-21.83	22	2478	1146
mmu-miR-326-3p	NONMMUT064235.2	293	-41.14	150	-21.83	21	3151	1263 476
mmu-miR-690	NONMMUT059456.2	141	-21.82	141	-21.82	22	994	593
mmu-miR-93-3p	NONMMUT141389.1	146	-21.82	146	-21.82	22	1366	982
mmu-miR-714	NONMMUT064235.2	154	-21.82	154	-21.82	21	3151	254
mmu-miR-330-5p	NONMMUT141389.1	288	-39.63	148	-21.82	22	1366	563 123
mmu-miR-301a-5p	NONMMUT064235.2	294	-36.91	147	-21.82	22	3151	628 842
mmu-miR-7014-5p	NONMMUT064235.2	298	-43.07	158	-21.82	22	3151	2588 1852
mmu-miR-18a-5p	NONMMUT052500.2	160	-21.81	160	-21.81	23	2570	2206
mmu-miR-181b-5p	NONMMUT064235.2	305	-40.38	164	-21.81	24	3151	1041 333
mmu-miR-669f-5p	NONMMUT064235.2	317	-36	174	-21.81	24	3151	1295 1892
mmu-miR-3094-5p	NONMMUT064235.2	140	-21.8	140	-21.8	21	3151	193
mmu-miR-1911-3p	NONMMUT059456.2	143	-21.8	143	-21.8	22	994	941
mmu-miR-421-3p	NONMMUT046460.2	146	-21.78	146	-21.78	23	2478	484
mmu-miR-6934-3p	NONMMUT046460.2	153	-21.77	153	-21.77	22	2478	2214
mmu-miR-363-5p	NONMMUT059456.2	156	-21.77	156	-21.77	22	994	555
mmu-miR-20a-5p	NONMMUT064235.2	155	-21.76	155	-21.76	23	3151	2349
mmu-miR-760-3p	NONMMUT064235.2	151	-21.75	151	-21.75	20	3151	504
mmu-miR-705	NONMMUT064235.2	297	-41.65	152	-21.75	20	3151	2545 146
mmu-miR-374b-3p	NONMMUT046460.2	153	-21.74	153	-21.74	22	2478	1381
mmu-miR-1933-5p	NONMMUT064235.2	162	-21.74	162	-21.74	24	3151	1374
mmu-miR-302d-3p	NONMMUT064235.2	462	-60.51	165	-21.74	23	3151	2347 2126 2026
mmu-miR-7004-3p	NONMMUT141389.1	141	-21.73	141	-21.73	21	1366	417
mmu-miR-466l-5p	NONMMUT046460.2	316	-36.72	160	-21.73	22	2478	282 1159
mmu-miR-6405	NONMMUT059456.2	145	-21.72	145	-21.72	23	994	650
mmu-miR-466q	NONMMUT064235.2	160	-21.72	160	-21.72	20	3151	2865
mmu-miR-7056-3p	NONMMUT141389.1	286	-41.38	144	-21.72	22	1366	323 989
mmu-miR-6904-5p	NONMMUT141389.1	144	-21.71	144	-21.71	22	1366	37
mmu-miR-6918-3p	NONMMUT059456.2	160	-21.71	160	-21.71	22	994	208
mmu-miR-7655-3p	NONMMUT064235.2	161	-21.71	161	-21.71	22	3151	2066
mmu-miR-7029-3p	NONMMUT052500.2	163	-21.71	163	-21.71	22	2570	2341
mmu-miR-6715-5p	NONMMUT141389.1	300	-42.53	153	-21.71	23	1366	586 539
mmu-miR-669a-5p	NONMMUT064235.2	313	-37.72	166	-21.71	24	3151	1295 1896
mmu-miR-669p-5p	NONMMUT064235.2	313	-37.72	166	-21.71	24	3151	1295 1896
mmu-miR-5113	NONMMUT046460.2	149	-21.7	149	-21.7	23	2478	550
mmu-miR-7226-5p	NONMMUT059456.2	142	-21.69	142	-21.69	26	994	719
mmu-miR-6974-5p	NONMMUT046460.2	151	-21.69	151	-21.69	24	2478	888
mmu-miR-7679-5p	NONMMUT064235.2	152	-21.69	152	-21.69	20	3151	1683
mmu-miR-7044-5p	NONMMUT049192.2	140	-21.68	140	-21.68	19	1011	592
mmu-miR-363-5p	NONMMUT049192.2	153	-21.68	153	-21.68	22	1011	428
mmu-miR-3086-5p	NONMMUT052500.2	157	-21.68	157	-21.68	20	2570	474
mmu-miR-6387	NONMMUT052500.2	160	-21.68	160	-21.68	22	2570	207
mmu-miR-7050-3p	NONMMUT141389.1	143	-21.67	143	-21.67	21	1366	277
mmu-miR-7231-5p	NONMMUT059456.2	148	-21.67	148	-21.67	22	994	770
mmu-miR-6931-3p	NONMMUT059456.2	166	-21.67	166	-21.67	21	994	590
mmu-miR-693-5p	NONMMUT052500.2	291	-34.46	147	-21.67	21	2570	1209 2357
mmu-miR-665-5p	NONMMUT141389.1	159	-21.66	159	-21.66	26	1366	915
mmu-miR-8102	NONMMUT141389.1	140	-21.64	140	-21.64	22	1366	611
mmu-miR-6988-5p	NONMMUT064235.2	140	-21.63	140	-21.63	21	3151	1691
mmu-miR-7038-5p	NONMMUT141389.1	143	-21.63	143	-21.63	22	1366	1240
mmu-miR-1968-5p	NONMMUT064235.2	309	-40.4	161	-21.62	24	3151	2004 196
mmu-miR-105	NONMMUT064235.2	439	-58.03	150	-21.61	23	3151	1785 2027 2348
mmu-miR-3101-3p	NONMMUT064235.2	284	-38.65	143	-21.6	21	3151	1632 2820
mmu-miR-181a-5p	NONMMUT064235.2	309	-38.62	160	-21.6	23	3151	1042 333
mmu-miR-7024-5p	NONMMUT049192.2	143	-21.59	143	-21.59	21	1011	406
mmu-miR-6992-5p	NONMMUT064235.2	151	-21.59	151	-21.59	23	3151	2602
mmu-miR-6916-5p	NONMMUT052500.2	153	-21.59	153	-21.59	21	2570	1832
mmu-miR-7035-5p	NONMMUT064235.2	156	-21.59	156	-21.59	21	3151	2005
mmu-miR-362-3p	NONMMUT052500.2	298	-37.72	153	-21.59	22	2570	1790 981
mmu-miR-3085-3p	NONMMUT141389.1	142	-21.57	142	-21.57	21	1366	442
mmu-miR-1955-5p	NONMMUT052500.2	145	-21.57	145	-21.57	25	2570	2288
mmu-miR-7018-5p	NONMMUT046460.2	149	-21.56	149	-21.56	24	2478	1351
mmu-miR-7664-3p	NONMMUT046460.2	144	-21.54	144	-21.54	23	2478	2105
mmu-miR-7667-3p	NONMMUT059456.2	154	-21.54	154	-21.54	22	994	743
mmu-miR-93-3p	NONMMUT052500.2	155	-21.54	155	-21.54	22	2570	138
mmu-miR-221-5p	NONMMUT046460.2	285	-40.63	145	-21.54	26	2478	922 1336
mmu-miR-467a-3p	NONMMUT046460.2	144	-21.53	144	-21.53	22	2478	1154
mmu-miR-6967-5p	NONMMUT046460.2	284	-40.06	143	-21.53	21	2478	967 1702
mmu-miR-7578	NONMMUT064235.2	144	-21.52	144	-21.52	24	3151	1394
mmu-miR-1903	NONMMUT064235.2	148	-21.52	148	-21.52	22	3151	2795
mmu-miR-6382	NONMMUT141389.1	159	-21.52	159	-21.52	24	1366	1242
mmu-miR-6955-5p	NONMMUT064235.2	141	-21.51	141	-21.51	24	3151	706
mmu-miR-7226-3p	NONMMUT052500.2	291	-38.95	151	-21.51	23	2570	2282 1499
mmu-miR-7231-3p	NONMMUT046460.2	157	-21.5	157	-21.5	23	2478	2192
mmu-miR-12196-3p	NONMMUT064235.2	141	-21.49	141	-21.49	22	3151	1733
mmu-miR-7226-3p	NONMMUT046460.2	143	-21.48	143	-21.48	23	2478	2149
mmu-miR-7665-5p	NONMMUT052500.2	145	-21.48	145	-21.48	23	2570	1918
mmu-miR-466n-5p	NONMMUT064235.2	451	-53.92	157	-21.48	22	3151	1295 2609 2333
mmu-miR-677-3p	NONMMUT046460.2	142	-21.47	142	-21.47	26	2478	2011
mmu-miR-28a-5p	NONMMUT059456.2	140	-21.46	140	-21.46	22	994	460
mmu-miR-145a-5p	NONMMUT064235.2	151	-21.46	151	-21.46	23	3151	1001
mmu-miR-1907	NONMMUT064235.2	288	-36.99	145	-21.46	22	3151	3029 2059
mmu-miR-466k	NONMMUT046460.2	310	-42.38	165	-21.46	23	2478	282 1157
mmu-miR-107-5p	NONMMUT141389.1	143	-21.45	143	-21.45	23	1366	326
mmu-miR-20b-3p	NONMMUT064235.2	295	-41.9	152	-21.45	22	3151	233 2058
mmu-miR-6912-3p	NONMMUT064235.2	295	-39.33	149	-21.45	25	3151	3046 159
mmu-miR-680	NONMMUT064235.2	297	-39.06	151	-21.45	21	3151	1671 1332
mmu-miR-145a-5p	NONMMUT046460.2	140	-21.44	140	-21.44	23	2478	1426
mmu-miR-145b	NONMMUT046460.2	140	-21.44	140	-21.44	21	2478	1428
mmu-miR-7029-3p	NONMMUT059456.2	143	-21.44	143	-21.44	22	994	298
mmu-miR-324-3p	NONMMUT064235.2	158	-21.44	158	-21.44	20	3151	391
mmu-miR-1306-3p	NONMMUT064235.2	141	-21.43	141	-21.43	21	3151	1675
mmu-miR-7015-5p	NONMMUT046460.2	144	-21.43	144	-21.43	23	2478	453
mmu-miR-5107-3p	NONMMUT064235.2	286	-42.1	146	-21.43	22	3151	2543 648
mmu-miR-7684-5p	NONMMUT141389.1	144	-21.41	144	-21.41	21	1366	566
mmu-miR-106a-5p	NONMMUT064235.2	151	-21.41	151	-21.41	23	3151	2349
mmu-miR-676-3p	NONMMUT059456.2	291	-39.45	151	-21.41	21	994	354 1
mmu-miR-12202-5p	NONMMUT052500.2	145	-21.39	145	-21.39	24	2570	831
mmu-miR-8108	NONMMUT064235.2	149	-21.39	149	-21.39	22	3151	192
mmu-miR-6962-5p	NONMMUT052500.2	150	-21.39	150	-21.39	20	2570	2307
mmu-miR-1899	NONMMUT141389.1	145	-21.38	145	-21.38	22	1366	486
mmu-miR-20b-5p	NONMMUT064235.2	147	-21.37	147	-21.37	23	3151	2349
mmu-miR-675-3p	NONMMUT064235.2	157	-21.37	157	-21.37	22	3151	1280
mmu-miR-7230-5p	NONMMUT052500.2	289	-40.82	149	-21.36	23	2570	140 2474
mmu-miR-8115	NONMMUT052500.2	142	-21.35	142	-21.35	22	2570	1036
mmu-miR-1a-3p	NONMMUT141389.1	158	-21.35	158	-21.35	22	1366	1242
mmu-miR-7215-5p	NONMMUT059456.2	159	-21.34	159	-21.34	25	994	712
mmu-miR-7031-3p	NONMMUT064235.2	141	-21.32	141	-21.32	21	3151	80
mmu-miR-212-5p	NONMMUT064235.2	156	-21.32	156	-21.32	23	3151	939
mmu-miR-6347	NONMMUT052500.2	158	-21.31	158	-21.31	22	2570	1604
mmu-miR-764-3p	NONMMUT052500.2	140	-21.3	140	-21.3	22	2570	2431
mmu-miR-7079-5p	NONMMUT046460.2	142	-21.3	142	-21.3	22	2478	2097
mmu-miR-1668	NONMMUT059456.2	158	-21.3	158	-21.3	21	994	595
mmu-miR-6925-5p	NONMMUT046460.2	315	-40.73	163	-21.3	22	2478	339 548
mmu-miR-136-5p	NONMMUT052500.2	422	-50.79	142	-21.3	22	2570	1110 1142 1320
mmu-miR-6413	NONMMUT064235.2	142	-21.29	142	-21.29	21	3151	506
mmu-miR-124-3p	NONMMUT052500.2	146	-21.29	146	-21.29	20	2570	94
mmu-miR-139-3p	NONMMUT064235.2	147	-21.29	147	-21.29	22	3151	526
mmu-miR-361-5p	NONMMUT064235.2	145	-21.28	145	-21.28	22	3151	931
mmu-miR-7237-5p	NONMMUT064235.2	157	-21.28	157	-21.28	24	3151	195
mmu-miR-449c-5p	NONMMUT064235.2	451	-50.98	155	-21.28	21	3151	1971 1410 1359
mmu-miR-6960-5p	NONMMUT052500.2	141	-21.27	141	-21.27	22	2570	1831
mmu-let-7c-5p	NONMMUT059456.2	148	-21.27	148	-21.27	22	994	533
mmu-miR-7024-3p	NONMMUT046460.2	140	-21.26	140	-21.26	23	2478	1217
mmu-miR-6366	NONMMUT049192.2	143	-21.26	143	-21.26	22	1011	502
mmu-miR-877-5p	NONMMUT059456.2	144	-21.26	144	-21.26	20	994	604
mmu-miR-6977-5p	NONMMUT049192.2	147	-21.26	147	-21.26	25	1011	883
mmu-miR-470-5p	NONMMUT059456.2	140	-21.25	140	-21.25	23	994	479
mmu-miR-7002-5p	NONMMUT052500.2	142	-21.25	142	-21.25	21	2570	204
mmu-miR-1964-5p	NONMMUT046460.2	144	-21.25	144	-21.25	22	2478	883
mmu-miR-129b-3p	NONMMUT046460.2	153	-21.24	153	-21.24	23	2478	447
mmu-miR-466p-5p	NONMMUT046460.2	449	-53.78	155	-21.23	21	2478	1161 286 2455
mmu-miR-1893	NONMMUT059456.2	146	-21.22	146	-21.22	22	994	464
mmu-miR-290a-3p	NONMMUT064235.2	169	-21.22	169	-21.22	24	3151	2125
mmu-miR-12201-3p	NONMMUT064235.2	296	-37.15	151	-21.22	21	3151	895 27
mmu-miR-145b	NONMMUT064235.2	151	-21.21	151	-21.21	21	3151	1003
mmu-miR-6372	NONMMUT052500.2	153	-21.21	153	-21.21	23	2570	1287
mmu-miR-2861	NONMMUT141389.1	140	-21.18	140	-21.18	19	1366	921
mmu-miR-330-3p	NONMMUT052500.2	148	-21.18	148	-21.18	23	2570	850
mmu-let-7a-5p	NONMMUT059456.2	151	-21.18	151	-21.18	22	994	532
mmu-miR-6353	NONMMUT052500.2	140	-21.16	140	-21.16	23	2570	2282
mmu-miR-370-5p	NONMMUT141389.1	149	-21.16	149	-21.16	20	1366	688
mmu-miR-6400	NONMMUT052500.2	145	-21.15	145	-21.15	21	2570	1705
mmu-miR-3064-5p	NONMMUT046460.2	164	-21.14	164	-21.14	22	2478	2098
mmu-miR-8100	NONMMUT059456.2	145	-21.13	145	-21.13	23	994	600
mmu-miR-7074-5p	NONMMUT046460.2	149	-21.13	149	-21.13	23	2478	198
mmu-miR-763	NONMMUT052500.2	152	-21.13	152	-21.13	22	2570	47
mmu-miR-201-5p	NONMMUT064235.2	161	-21.13	161	-21.13	22	3151	2408
mmu-miR-669n	NONMMUT064235.2	146	-21.12	146	-21.12	20	3151	2613
mmu-miR-432	NONMMUT064235.2	151	-21.12	151	-21.12	23	3151	1845
mmu-let-7b-5p	NONMMUT059456.2	148	-21.11	148	-21.11	22	994	533
mmu-miR-6346	NONMMUT064235.2	301	-39.11	155	-21.11	22	3151	2109 1692
mmu-miR-1187	NONMMUT064235.2	306	-41.91	153	-21.11	23	3151	1295 2609
mmu-miR-667-5p	NONMMUT046460.2	141	-21.1	141	-21.1	25	2478	295
mmu-miR-770-3p	NONMMUT052500.2	150	-21.1	150	-21.1	22	2570	680
mmu-miR-7652-3p	NONMMUT052500.2	152	-21.09	152	-21.09	21	2570	1006
mmu-miR-760-3p	NONMMUT052500.2	293	-41.67	153	-21.09	20	2570	2341 1013
mmu-miR-6986-3p	NONMMUT064235.2	140	-21.08	140	-21.08	19	3151	682
mmu-miR-3081-5p	NONMMUT064235.2	149	-21.07	149	-21.07	23	3151	1151
mmu-miR-6897-5p	NONMMUT141389.1	141	-21.06	141	-21.06	23	1366	577
mmu-miR-6944-3p	NONMMUT064235.2	142	-21.06	142	-21.06	23	3151	2373
mmu-miR-342-3p	NONMMUT064235.2	145	-21.06	145	-21.06	23	3151	2870
mmu-miR-217-5p	NONMMUT064235.2	150	-21.06	150	-21.06	23	3151	662
mmu-miR-6978-5p	NONMMUT141389.1	140	-21.04	140	-21.04	23	1366	87
mmu-miR-7225-5p	NONMMUT141389.1	143	-21.04	143	-21.04	20	1366	251
mmu-miR-466n-5p	NONMMUT046460.2	140	-21.03	140	-21.03	22	2478	1157
mmu-miR-362-3p	NONMMUT046460.2	144	-21.03	144	-21.03	22	2478	911
mmu-miR-329-3p	NONMMUT141389.1	167	-21.03	167	-21.03	22	1366	1152
mmu-miR-449a-5p	NONMMUT064235.2	475	-52.46	163	-21.03	22	3151	1970 1409 1358
mmu-miR-1970b-5p	NONMMUT046460.2	300	-37.25	151	-21.02	24	2478	2077 2417
mmu-miR-6939-5p	NONMMUT046460.2	154	-21.01	154	-21.01	21	2478	889
mmu-miR-669c-3p	NONMMUT046460.2	159	-21.01	159	-21.01	22	2478	1146
mmu-miR-7216-5p	NONMMUT059456.2	143	-21	143	-21	24	994	945
mmu-miR-423-5p	NONMMUT052500.2	151	-20.99	151	-20.99	23	2570	164
mmu-miR-6240	NONMMUT052500.2	294	-35.94	149	-20.99	26	2570	2099 2110
mmu-miR-154-5p	NONMMUT049192.2	145	-20.98	145	-20.98	22	1011	55
mmu-miR-6908-3p	NONMMUT059456.2	140	-20.97	140	-20.97	22	994	15
mmu-miR-3059-3p	NONMMUT064235.2	141	-20.97	141	-20.97	22	3151	3006
mmu-miR-7671-5p	NONMMUT141389.1	145	-20.97	145	-20.97	23	1366	124
mmu-miR-6366	NONMMUT046460.2	288	-37.3	146	-20.97	22	2478	2446 1869
mmu-miR-6938-3p	NONMMUT052500.2	143	-20.96	143	-20.96	22	2570	232
mmu-miR-337-3p	NONMMUT141389.1	149	-20.95	149	-20.95	22	1366	237
mmu-miR-6976-5p	NONMMUT052500.2	160	-20.95	160	-20.95	23	2570	1919
mmu-miR-140-3p	NONMMUT052500.2	141	-20.94	141	-20.94	21	2570	1414
mmu-miR-802-3p	NONMMUT049192.2	141	-20.94	141	-20.94	22	1011	324
mmu-miR-7242-3p	NONMMUT052500.2	143	-20.94	143	-20.94	22	2570	991
mmu-miR-5101	NONMMUT046460.2	158	-20.93	158	-20.93	22	2478	1598
mmu-miR-96-3p	NONMMUT049192.2	143	-20.91	143	-20.91	22	1011	211
mmu-miR-7092-3p	NONMMUT141389.1	151	-20.91	151	-20.91	24	1366	996
mmu-miR-7656-5p	NONMMUT064235.2	156	-20.91	156	-20.91	22	3151	1928
mmu-miR-6927-5p	NONMMUT064235.2	140	-20.88	140	-20.88	22	3151	1105
mmu-miR-3471	NONMMUT141389.1	141	-20.88	141	-20.88	22	1366	215
mmu-miR-667-5p	NONMMUT064235.2	286	-40.17	145	-20.87	25	3151	1766 2584
mmu-miR-1962	NONMMUT049192.2	140	-20.86	140	-20.86	22	1011	682
mmu-miR-7053-5p	NONMMUT046460.2	142	-20.85	142	-20.85	21	2478	582
mmu-miR-6916-5p	NONMMUT046460.2	164	-20.85	164	-20.85	21	2478	342
mmu-miR-466n-3p	NONMMUT052500.2	609	-61.98	164	-20.85	22	2570	2414 2398 1382 2196
mmu-miR-151-5p	NONMMUT046460.2	151	-20.84	151	-20.84	21	2478	424
mmu-miR-15a-5p	NONMMUT064235.2	164	-20.81	164	-20.81	22	3151	3027
mmu-miR-129b-5p	NONMMUT064235.2	432	-42.52	148	-20.81	22	3151	1608 2644 1515
mmu-miR-30e-3p	NONMMUT141389.1	141	-20.8	141	-20.8	22	1366	816
mmu-miR-3063-5p	NONMMUT064235.2	141	-20.8	141	-20.8	21	3151	1844
mmu-miR-380-3p	NONMMUT052500.2	174	-20.8	174	-20.8	22	2570	2138
mmu-miR-1911-5p	NONMMUT046460.2	156	-20.79	156	-20.79	23	2478	10
mmu-miR-6903-3p	NONMMUT141389.1	284	-30.62	143	-20.79	20	1366	1017 952
mmu-miR-1968-5p	NONMMUT046460.2	141	-20.78	141	-20.78	24	2478	886
mmu-miR-466a-3p	NONMMUT052500.2	519	-45.92	185	-20.78	23	2570	2397 2413 2195
mmu-miR-466e-3p	NONMMUT052500.2	519	-45.92	185	-20.78	23	2570	2397 2413 2195
mmu-miR-1902	NONMMUT064235.2	143	-20.75	143	-20.75	22	3151	359
mmu-miR-709	NONMMUT052500.2	280	-40.53	140	-20.75	19	2570	345 1543
mmu-miR-465a-5p	NONMMUT046460.2	293	-36.79	147	-20.75	23	2478	1686 1194
mmu-miR-7683-5p	NONMMUT052500.2	143	-20.73	143	-20.73	22	2570	260
mmu-miR-1894-3p	NONMMUT052500.2	142	-20.72	142	-20.72	22	2570	2516
mmu-miR-3104-3p	NONMMUT064235.2	142	-20.72	142	-20.72	23	3151	477
mmu-miR-362-5p	NONMMUT141389.1	147	-20.72	147	-20.72	24	1366	218
mmu-miR-6900-5p	NONMMUT059456.2	153	-20.72	153	-20.72	24	994	562
mmu-miR-7083-5p	NONMMUT059456.2	141	-20.71	141	-20.71	21	994	78
mmu-miR-3087-5p	NONMMUT052500.2	151	-20.71	151	-20.71	21	2570	1498
mmu-miR-6965-5p	NONMMUT064235.2	297	-41.22	152	-20.71	24	3151	1103 3091
mmu-miR-710	NONMMUT046460.2	140	-20.7	140	-20.7	22	2478	447
mmu-miR-7090-5p	NONMMUT059456.2	145	-20.7	145	-20.7	23	994	603
mmu-miR-7215-3p	NONMMUT052500.2	156	-20.7	156	-20.7	23	2570	2336
mmu-miR-22-3p	NONMMUT052500.2	158	-20.7	158	-20.7	22	2570	1427
mmu-miR-1982-3p	NONMMUT052500.2	140	-20.69	140	-20.69	23	2570	648
mmu-miR-1955-5p	NONMMUT141389.1	146	-20.69	146	-20.69	25	1366	894
mmu-miR-713	NONMMUT064235.2	151	-20.69	151	-20.69	19	3151	70
mmu-miR-379-5p	NONMMUT052500.2	140	-20.68	140	-20.68	21	2570	537
mmu-miR-216b-3p	NONMMUT052500.2	141	-20.68	141	-20.68	22	2570	651
mmu-miR-6993-5p	NONMMUT064235.2	291	-40.16	151	-20.68	23	3151	144 2542
mmu-miR-6898-3p	NONMMUT046460.2	441	-56.85	149	-20.68	21	2478	2132 2376 2067
mmu-miR-302b-3p	NONMMUT052500.2	142	-20.67	142	-20.67	23	2570	1363
mmu-miR-7215-3p	NONMMUT046460.2	149	-20.67	149	-20.67	23	2478	2022
mmu-miR-7009-5p	NONMMUT059456.2	142	-20.66	142	-20.66	22	994	158
mmu-miR-7037-3p	NONMMUT059456.2	150	-20.65	150	-20.65	22	994	340
mmu-miR-6378	NONMMUT064235.2	140	-20.64	140	-20.64	22	3151	2828
mmu-miR-302c-3p	NONMMUT046460.2	157	-20.64	157	-20.64	22	2478	2194
mmu-miR-7086-5p	NONMMUT046460.2	284	-40.51	143	-20.64	21	2478	585 551
mmu-miR-6966-5p	NONMMUT059456.2	152	-20.62	152	-20.62	21	994	748
mmu-miR-503-5p	NONMMUT064235.2	438	-57.69	149	-20.62	23	3151	136 3028 1715
mmu-miR-6905-5p	NONMMUT059456.2	150	-20.61	150	-20.61	23	994	641
mmu-miR-26a-5p	NONMMUT046460.2	151	-20.61	151	-20.61	22	2478	496
mmu-miR-16-1-3p	NONMMUT064235.2	148	-20.6	148	-20.6	22	3151	1431
mmu-miR-208b-5p	NONMMUT064235.2	288	-28.42	147	-20.6	22	3151	2629 1956
mmu-miR-7677-5p	NONMMUT049192.2	149	-20.59	149	-20.59	25	1011	433
mmu-miR-6361	NONMMUT046460.2	144	-20.58	144	-20.58	23	2478	1321
mmu-miR-466d-5p	NONMMUT064235.2	436	-54.52	147	-20.58	22	3151	2334 2600 1296
mmu-miR-344e-5p	NONMMUT059456.2	148	-20.57	148	-20.57	20	994	202
mmu-miR-344h-5p	NONMMUT059456.2	148	-20.57	148	-20.57	20	994	202
mmu-miR-7688-3p	NONMMUT046460.2	294	-38.29	153	-20.57	21	2478	1108 1524
mmu-miR-7115-3p	NONMMUT064235.2	155	-20.56	155	-20.56	22	3151	1629
mmu-miR-7229-3p	NONMMUT052500.2	140	-20.55	140	-20.55	24	2570	1495
mmu-miR-672-5p	NONMMUT064235.2	146	-20.55	146	-20.55	23	3151	3087
mmu-miR-6417	NONMMUT046460.2	325	-33.76	163	-20.55	22	2478	1652 1351
mmu-miR-6241	NONMMUT052500.2	141	-20.54	141	-20.54	19	2570	195
mmu-miR-98-5p	NONMMUT059456.2	152	-20.54	152	-20.54	22	994	533
mmu-miR-7242-3p	NONMMUT064235.2	152	-20.54	152	-20.54	22	3151	196
mmu-miR-1892	NONMMUT046460.2	147	-20.53	147	-20.53	22	2478	200
mmu-miR-322-5p	NONMMUT064235.2	153	-20.52	153	-20.52	22	3151	3029
mmu-miR-7239-3p	NONMMUT052500.2	143	-20.51	143	-20.51	20	2570	2340
mmu-miR-28c	NONMMUT064235.2	148	-20.51	148	-20.51	20	3151	897
mmu-miR-7083-5p	NONMMUT049192.2	144	-20.5	144	-20.5	21	1011	379
mmu-miR-12196-5p	NONMMUT141389.1	145	-20.49	145	-20.49	23	1366	302
mmu-miR-6970-5p	NONMMUT046460.2	149	-20.49	149	-20.49	25	2478	1749
mmu-miR-7218-5p	NONMMUT064235.2	303	-37.08	154	-20.49	21	3151	1147 2424
mmu-miR-7083-3p	NONMMUT064235.2	589	-73.3	155	-20.49	20	3151	22 1270 1322 915
mmu-miR-453	NONMMUT064235.2	142	-20.48	142	-20.48	24	3151	1860
mmu-miR-302b-3p	NONMMUT064235.2	451	-55.46	159	-20.48	23	3151	2347 2027 2126
mmu-miR-409-3p	NONMMUT064235.2	460	-54.72	164	-20.48	22	3151	1069 1184 1655
mmu-miR-344d-2-5p	NONMMUT064235.2	140	-20.47	140	-20.47	24	3151	2402
mmu-miR-1964-5p	NONMMUT141389.1	140	-20.47	140	-20.47	22	1366	177
mmu-miR-6958-5p	NONMMUT052500.2	153	-20.47	153	-20.47	22	2570	1867
mmu-miR-132-5p	NONMMUT052500.2	150	-20.45	150	-20.45	22	2570	2491
mmu-miR-7036a-3p	NONMMUT049192.2	156	-20.45	156	-20.45	23	1011	606
mmu-miR-296-5p	NONMMUT052500.2	140	-20.43	140	-20.43	21	2570	966
mmu-miR-6419	NONMMUT046460.2	140	-20.42	140	-20.42	22	2478	1218
mmu-miR-8119	NONMMUT052500.2	141	-20.42	141	-20.42	20	2570	2066
mmu-miR-3103-5p	NONMMUT052500.2	430	-59.69	145	-20.41	21	2570	1855 211 438
mmu-miR-7012-5p	NONMMUT046460.2	160	-20.4	160	-20.4	23	2478	418
mmu-miR-1970	NONMMUT052500.2	141	-20.39	141	-20.39	23	2570	2521
mmu-miR-6947-3p	NONMMUT046460.2	296	-39.96	151	-20.39	22	2478	2069 2409
mmu-miR-327	NONMMUT046460.2	140	-20.38	140	-20.38	19	2478	894
mmu-miR-7073-3p	NONMMUT141389.1	140	-20.38	140	-20.38	22	1366	999
mmu-miR-195b	NONMMUT052500.2	143	-20.38	143	-20.38	22	2570	2284
mmu-miR-320-5p	NONMMUT052500.2	145	-20.38	145	-20.38	22	2570	559
mmu-miR-6921-5p	NONMMUT052500.2	150	-20.38	150	-20.38	22	2570	165
mmu-miR-28a-5p	NONMMUT064235.2	299	-36.18	154	-20.36	22	3151	896 2979
mmu-miR-6360	NONMMUT064235.2	301	-38.26	157	-20.36	22	3151	3075 1182
mmu-miR-3102-3p	NONMMUT052500.2	429	-56.02	145	-20.35	23	2570	844 464 2226
mmu-miR-6979-3p	NONMMUT046460.2	155	-20.34	155	-20.34	21	2478	2230
mmu-miR-6903-3p	NONMMUT064235.2	150	-20.32	150	-20.32	20	3151	2610
mmu-miR-682	NONMMUT059456.2	158	-20.32	158	-20.32	21	994	730
mmu-miR-3102-5p.2-5p	NONMMUT064235.2	146	-20.31	146	-20.31	21	3151	3014
mmu-miR-1983	NONMMUT052500.2	163	-20.3	163	-20.3	21	2570	1548
mmu-miR-532-5p	NONMMUT064235.2	300	-33.64	158	-20.3	22	3151	425 2472
mmu-miR-712-5p	NONMMUT059456.2	304	-36.32	154	-20.3	21	994	422 367
mmu-miR-6976-5p	NONMMUT064235.2	140	-20.29	140	-20.29	23	3151	2995
mmu-miR-3968	NONMMUT046460.2	152	-20.29	152	-20.29	21	2478	1501
mmu-miR-7078-5p	NONMMUT064235.2	287	-38.76	147	-20.29	20	3151	2924 2591
mmu-miR-669b-3p	NONMMUT046460.2	141	-20.28	141	-20.28	23	2478	1153
mmu-miR-6898-5p	NONMMUT064235.2	142	-20.28	142	-20.28	22	3151	1078
mmu-miR-344c-5p	NONMMUT052500.2	149	-20.27	149	-20.27	23	2570	1155
mmu-miR-1224-5p	NONMMUT059456.2	143	-20.26	143	-20.26	21	994	614
mmu-miR-8093	NONMMUT046460.2	141	-20.25	141	-20.25	21	2478	585
mmu-miR-5113	NONMMUT064235.2	143	-20.24	143	-20.24	23	3151	2997
mmu-miR-6387	NONMMUT064235.2	293	-39.03	153	-20.24	22	3151	2900 109
mmu-miR-7022-5p	NONMMUT052500.2	140	-20.23	140	-20.23	23	2570	2069
mmu-miR-3089-5p	NONMMUT059456.2	145	-20.23	145	-20.23	22	994	459
mmu-miR-5129-3p	NONMMUT064235.2	152	-20.23	152	-20.23	22	3151	2608
mmu-miR-6914-3p	NONMMUT064235.2	313	-39.5	157	-20.23	19	3151	249 983
mmu-miR-1231-3p	NONMMUT052500.2	142	-20.21	142	-20.21	23	2570	1145
mmu-miR-3473g	NONMMUT064235.2	286	-40.19	145	-20.21	20	3151	2929 952
mmu-miR-7068-5p	NONMMUT052500.2	143	-20.2	143	-20.2	21	2570	1359
mmu-miR-30c-1-3p	NONMMUT064235.2	144	-20.2	144	-20.2	22	3151	2542
mmu-miR-6928-5p	NONMMUT141389.1	150	-20.18	150	-20.18	23	1366	352
mmu-miR-449b	NONMMUT064235.2	453	-55.66	157	-20.18	20	3151	1358 1413 1970
mmu-miR-1912-5p	NONMMUT141389.1	143	-20.17	143	-20.17	22	1366	740
mmu-miR-129-5p	NONMMUT064235.2	441	-35.82	154	-20.17	21	3151	1516 2307 1205
mmu-miR-290a-3p	NONMMUT052500.2	142	-20.16	142	-20.16	24	2570	2371
mmu-miR-1948-3p	NONMMUT052500.2	427	-54.47	146	-20.16	22	2570	2189 1186 1214
mmu-miR-682	NONMMUT052500.2	140	-20.15	140	-20.15	21	2570	826
mmu-miR-12187-5p	NONMMUT059456.2	140	-20.15	140	-20.15	22	994	740
mmu-miR-297c-5p	NONMMUT046460.2	312	-37.32	168	-20.15	22	2478	1159 284
mmu-miR-3105-5p	NONMMUT064235.2	143	-20.14	143	-20.14	22	3151	1829
mmu-miR-3083-5p	NONMMUT141389.1	144	-20.14	144	-20.14	22	1366	669
mmu-miR-7094b-2-5p	NONMMUT141389.1	145	-20.14	145	-20.14	23	1366	392
mmu-miR-3074-5p	NONMMUT052500.2	150	-20.14	150	-20.14	22	2570	1705
mmu-miR-6981-3p	NONMMUT064235.2	143	-20.13	143	-20.13	22	3151	2732
mmu-miR-5626-3p	NONMMUT064235.2	156	-20.13	156	-20.13	22	3151	262
mmu-miR-3082-5p	NONMMUT059456.2	140	-20.12	140	-20.12	22	994	409
mmu-miR-466d-3p	NONMMUT052500.2	499	-45.24	175	-20.12	21	2570	2399 2415 2197
mmu-miR-6992-5p	NONMMUT046460.2	152	-20.11	152	-20.11	23	2478	455
mmu-miR-6907-3p	NONMMUT049192.2	141	-20.09	141	-20.09	23	1011	649
mmu-miR-3081-3p	NONMMUT052500.2	143	-20.09	143	-20.09	23	2570	1346
mmu-miR-23b-5p	NONMMUT052500.2	140	-20.08	140	-20.08	21	2570	2293
mmu-miR-7119-5p	NONMMUT049192.2	144	-20.08	144	-20.08	21	1011	408
mmu-miR-6394	NONMMUT049192.2	146	-20.08	146	-20.08	21	1011	305
mmu-miR-6934-5p	NONMMUT052500.2	287	-38.75	146	-20.07	22	2570	2452 1740
mmu-miR-6942-5p	NONMMUT046460.2	302	-39.75	158	-20.07	21	2478	342 1710
mmu-miR-378d	NONMMUT064235.2	305	-39.95	160	-20.07	22	3151	2401 1633
mmu-miR-767	NONMMUT052500.2	142	-20.06	142	-20.06	21	2570	2493
mmu-miR-12181-3p	NONMMUT046460.2	143	-20.06	143	-20.06	21	2478	359
mmu-miR-1983	NONMMUT064235.2	152	-20.06	152	-20.06	21	3151	650
mmu-miR-6929-5p	NONMMUT141389.1	150	-20.05	150	-20.05	21	1366	666
mmu-miR-1912-5p	NONMMUT064235.2	432	-53.42	146	-20.05	22	3151	1591 2300 837
mmu-miR-132-3p	NONMMUT141389.1	150	-20.04	150	-20.04	22	1366	796
mmu-miR-199a-3p	NONMMUT064235.2	144	-20.03	144	-20.03	22	3151	3030
mmu-miR-199b-3p	NONMMUT064235.2	144	-20.03	144	-20.03	22	3151	3030
mmu-miR-5627-5p	NONMMUT046460.2	144	-20.03	144	-20.03	22	2478	226
mmu-miR-6935-3p	NONMMUT141389.1	149	-20.02	149	-20.02	20	1366	999
mmu-miR-6384	NONMMUT052500.2	302	-31.37	154	-20.01	20	2570	1709 2044
mmu-miR-344d-2-5p	NONMMUT141389.1	140	-20	140	-20	24	1366	442
mmu-miR-151-3p	NONMMUT064235.2	146	-20	146	-20	21	3151	2730
mmu-miR-1968-3p	NONMMUT052500.2	146	-20	146	-20	21	2570	2236
mmu-miR-7217-3p	NONMMUT141389.1	152	-20	152	-20	22	1366	979
mmu-miR-5110	NONMMUT141389.1	140	-19.99	140	-19.99	25	1366	1284
mmu-miR-7066-5p	NONMMUT052500.2	142	-19.99	142	-19.99	22	2570	1
mmu-miR-327	NONMMUT052500.2	148	-19.99	148	-19.99	19	2570	2098
mmu-miR-3071-5p	NONMMUT059456.2	152	-19.99	152	-19.99	22	994	699
mmu-miR-297b-3p	NONMMUT052500.2	508	-56.02	177	-19.99	22	2570	2398 2414 2192
mmu-miR-297a-3p	NONMMUT052500.2	508	-56.02	177	-19.99	22	2570	2398 2414 2192
mmu-miR-297c-3p	NONMMUT052500.2	508	-56.02	177	-19.99	22	2570	2398 2414 2192
mmu-miR-7239-3p	NONMMUT064235.2	154	-19.98	154	-19.98	20	3151	507
mmu-miR-345-3p	NONMMUT052500.2	288	-37.99	146	-19.98	22	2570	1081 2085
mmu-miR-206-5p	NONMMUT046460.2	303	-27.8	163	-19.98	23	2478	2193 349
mmu-miR-874-5p	NONMMUT046460.2	147	-19.97	147	-19.97	22	2478	355
mmu-miR-3079-3p	NONMMUT052500.2	147	-19.97	147	-19.97	21	2570	1357
mmu-miR-674-3p	NONMMUT046460.2	140	-19.96	140	-19.96	22	2478	2149
mmu-miR-467h	NONMMUT141389.1	142	-19.96	142	-19.96	22	1366	1016
mmu-miR-3058-3p	NONMMUT064235.2	143	-19.96	143	-19.96	21	3151	2696
mmu-miR-297a-5p	NONMMUT064235.2	145	-19.96	145	-19.96	22	3151	2613
mmu-miR-214-5p	NONMMUT141389.1	153	-19.96	153	-19.96	22	1366	946
mmu-miR-3083-5p	NONMMUT059456.2	140	-19.95	140	-19.95	22	994	161
mmu-miR-12182-5p	NONMMUT052500.2	151	-19.95	151	-19.95	22	2570	777
mmu-miR-7073-5p	NONMMUT052500.2	598	-70.88	160	-19.95	22	2570	1922 1663 2504 1866
mmu-miR-6999-5p	NONMMUT046460.2	734	-80.32	153	-19.95	23	2478	1703 965 227 340 53
mmu-miR-1943-5p	NONMMUT046460.2	142	-19.94	142	-19.94	23	2478	1701
mmu-miR-7017-5p	NONMMUT046460.2	142	-19.93	142	-19.93	24	2478	515
mmu-miR-1247-5p	NONMMUT052500.2	147	-19.93	147	-19.93	22	2570	959
mmu-miR-468-3p	NONMMUT052500.2	154	-19.92	154	-19.92	23	2570	142
mmu-miR-669f-3p	NONMMUT052500.2	456	-46.96	169	-19.92	23	2570	2399 2415 2196
mmu-miR-764-3p	NONMMUT141389.1	140	-19.91	140	-19.91	22	1366	479
mmu-miR-669b-3p	NONMMUT052500.2	473	-48.33	173	-19.91	23	2570	2399 2197 2415
mmu-miR-674-5p	NONMMUT064235.2	282	-37.14	142	-19.89	22	3151	2462 65
mmu-miR-152-5p	NONMMUT141389.1	144	-19.88	144	-19.88	24	1366	562
mmu-miR-6349	NONMMUT052500.2	152	-19.88	152	-19.88	22	2570	2217
mmu-miR-7043-5p	NONMMUT046460.2	290	-31.23	148	-19.88	23	2478	977 1176
mmu-miR-669l-5p	NONMMUT064235.2	312	-33.68	168	-19.87	22	3151	1297 1894
mmu-miR-7005-3p	NONMMUT064235.2	146	-19.86	146	-19.86	25	3151	2607
mmu-miR-6386	NONMMUT064235.2	444	-54.97	163	-19.85	24	3151	422 2593 2470
mmu-miR-7049-3p	NONMMUT141389.1	142	-19.84	142	-19.84	21	1366	592
mmu-miR-7022-3p	NONMMUT046460.2	155	-19.84	155	-19.84	22	2478	445
mmu-miR-451b	NONMMUT052500.2	142	-19.83	142	-19.83	21	2570	436
mmu-miR-7683-5p	NONMMUT141389.1	144	-19.83	144	-19.83	22	1366	908
mmu-miR-672-3p	NONMMUT052500.2	146	-19.82	146	-19.82	21	2570	2282
mmu-miR-337-3p	NONMMUT052500.2	144	-19.81	144	-19.81	22	2570	382
mmu-miR-205-5p	NONMMUT059456.2	145	-19.81	145	-19.81	22	994	361
mmu-miR-466f-3p	NONMMUT052500.2	292	-33.93	150	-19.8	21	2570	2399 2415
mmu-miR-1188-5p	NONMMUT059456.2	141	-19.76	141	-19.76	21	994	406
mmu-miR-7066-5p	NONMMUT064235.2	294	-37.78	149	-19.76	22	3151	1144 2223
mmu-miR-5615-5p	NONMMUT046460.2	143	-19.75	143	-19.75	22	2478	1387
mmu-miR-3098-5p	NONMMUT049192.2	147	-19.75	147	-19.75	22	1011	902
mmu-miR-7092-3p	NONMMUT052500.2	147	-19.74	147	-19.74	24	2570	1707
mmu-miR-691	NONMMUT064235.2	149	-19.74	149	-19.74	22	3151	2907
mmu-miR-362-3p	NONMMUT141389.1	155	-19.74	155	-19.74	22	1366	1152
mmu-miR-467e-5p	NONMMUT141389.1	142	-19.73	142	-19.73	22	1366	1016
mmu-miR-99b-5p	NONMMUT064235.2	144	-19.71	144	-19.71	22	3151	1982
mmu-miR-7048-3p	NONMMUT059456.2	143	-19.7	143	-19.7	21	994	851
mmu-miR-151-5p	NONMMUT052500.2	140	-19.69	140	-19.69	21	2570	692
mmu-miR-7089-3p	NONMMUT064235.2	152	-19.69	152	-19.69	22	3151	1966
mmu-miR-6408	NONMMUT046460.2	286	-36.65	144	-19.68	24	2478	571 244
mmu-miR-7038-5p	NONMMUT059456.2	143	-19.67	143	-19.67	22	994	275
mmu-miR-1291	NONMMUT064235.2	424	-53.88	143	-19.67	26	3151	2909 2663 502
mmu-miR-7027-5p	NONMMUT046460.2	446	-47.51	151	-19.67	23	2478	969 52 566
mmu-miR-669o-5p	NONMMUT064235.2	448	-53.06	153	-19.67	23	3151	1297 1894 1601
mmu-miR-761	NONMMUT046460.2	142	-19.66	142	-19.66	22	2478	589
mmu-miR-691	NONMMUT052500.2	154	-19.65	154	-19.65	22	2570	1362
mmu-miR-1900	NONMMUT141389.1	143	-19.64	143	-19.64	22	1366	272
mmu-miR-8092	NONMMUT141389.1	153	-19.64	153	-19.64	21	1366	793
mmu-miR-6540-5p	NONMMUT046460.2	156	-19.64	156	-19.64	22	2478	890
mmu-miR-293-3p	NONMMUT141389.1	140	-19.62	140	-19.62	22	1366	750
mmu-miR-7651-3p	NONMMUT064235.2	145	-19.62	145	-19.62	24	3151	2400
mmu-miR-653-3p	NONMMUT064235.2	313	-36.9	160	-19.62	21	3151	2825 2450
mmu-miR-1843a-5p	NONMMUT141389.1	147	-19.61	147	-19.61	21	1366	482
mmu-miR-1929-3p	NONMMUT052500.2	151	-19.6	151	-19.6	22	2570	1353
mmu-miR-466k	NONMMUT064235.2	435	-53.18	151	-19.6	23	3151	2600 2332 1295
mmu-miR-7678-3p	NONMMUT064235.2	287	-37.84	146	-19.58	22	3151	2709 791
mmu-miR-882	NONMMUT052500.2	291	-35.31	146	-19.57	22	2570	2067 671
mmu-miR-7006-5p	NONMMUT052500.2	142	-19.56	142	-19.56	25	2570	1390
mmu-miR-17-3p	NONMMUT059456.2	151	-19.55	151	-19.55	22	994	727
mmu-miR-7214-3p	NONMMUT052500.2	145	-19.54	145	-19.54	24	2570	1099
mmu-miR-27a-3p	NONMMUT052500.2	150	-19.54	150	-19.54	21	2570	2529
mmu-miR-6986-5p	NONMMUT064235.2	141	-19.53	141	-19.53	22	3151	36
mmu-miR-186-3p	NONMMUT064235.2	155	-19.52	155	-19.52	22	3151	345
mmu-miR-6409	NONMMUT064235.2	140	-19.51	140	-19.51	23	3151	1945
mmu-miR-741-3p	NONMMUT052500.2	149	-19.51	149	-19.51	23	2570	2060
mmu-miR-433-3p	NONMMUT046460.2	158	-19.51	158	-19.51	22	2478	1982
mmu-miR-5623-3p	NONMMUT052500.2	151	-19.49	151	-19.49	22	2570	1007
mmu-miR-6908-5p	NONMMUT141389.1	152	-19.48	152	-19.48	22	1366	946
mmu-miR-6948-5p	NONMMUT141389.1	141	-19.46	141	-19.46	22	1366	944
mmu-miR-6382	NONMMUT046460.2	149	-19.46	149	-19.46	24	2478	1158
mmu-miR-7000-3p	NONMMUT052500.2	147	-19.45	147	-19.45	22	2570	939
mmu-miR-452-3p	NONMMUT059456.2	158	-19.45	158	-19.45	22	994	607
mmu-miR-21a-3p	NONMMUT064235.2	140	-19.44	140	-19.44	22	3151	1696
mmu-miR-485-3p	NONMMUT046460.2	144	-19.44	144	-19.44	22	2478	2419
mmu-miR-509-3p	NONMMUT064235.2	151	-19.44	151	-19.44	21	3151	2146
mmu-miR-1902	NONMMUT052500.2	284	-34.67	144	-19.42	22	2570	2209 1918
mmu-miR-155-3p	NONMMUT052500.2	144	-19.41	144	-19.41	21	2570	445
mmu-miR-3101-5p	NONMMUT064235.2	140	-19.4	140	-19.4	21	3151	2328
mmu-miR-466q	NONMMUT052500.2	145	-19.39	145	-19.39	20	2570	2206
mmu-miR-150-5p	NONMMUT141389.1	147	-19.39	147	-19.39	22	1366	624
mmu-miR-18b-5p	NONMMUT052500.2	150	-19.39	150	-19.39	23	2570	2205
mmu-miR-103-3p	NONMMUT064235.2	153	-19.39	153	-19.39	23	3151	3028
mmu-miR-107-3p	NONMMUT064235.2	153	-19.39	153	-19.39	23	3151	3028
mmu-miR-7210-3p	NONMMUT052500.2	141	-19.38	141	-19.38	24	2570	2152
mmu-miR-8116	NONMMUT052500.2	146	-19.38	146	-19.38	21	2570	2244
mmu-miR-26a-2-3p	NONMMUT064235.2	444	-48.97	152	-19.37	22	3151	2808 740 2720
mmu-miR-701-3p	NONMMUT046460.2	140	-19.36	140	-19.36	20	2478	1730
mmu-miR-6991-3p	NONMMUT046460.2	144	-19.35	144	-19.35	22	2478	2411
mmu-miR-7049-3p	NONMMUT064235.2	140	-19.34	140	-19.34	21	3151	638
mmu-miR-139-5p	NONMMUT052500.2	161	-19.33	161	-19.33	22	2570	1251
mmu-miR-29b-2-5p	NONMMUT064235.2	291	-32.84	150	-19.33	25	3151	2740 2510
mmu-miR-465d-5p	NONMMUT046460.2	434	-47.15	147	-19.33	23	2478	1686 1194 1788
mmu-miR-299a-3p	NONMMUT064235.2	140	-19.32	140	-19.32	22	3151	2923
mmu-miR-5135	NONMMUT052500.2	150	-19.32	150	-19.32	24	2570	1767
mmu-miR-1896	NONMMUT064235.2	159	-19.32	159	-19.32	22	3151	2191
mmu-miR-362-5p	NONMMUT064235.2	158	-19.3	158	-19.3	24	3151	2159
mmu-miR-135a-1-3p	NONMMUT141389.1	288	-34.09	148	-19.29	22	1366	1328 1304
mmu-miR-7240-5p	NONMMUT064235.2	142	-19.28	142	-19.28	21	3151	501
mmu-miR-669m-5p	NONMMUT141389.1	145	-19.28	145	-19.28	23	1366	1179
mmu-miR-466m-5p	NONMMUT141389.1	145	-19.28	145	-19.28	23	1366	1179
mmu-miR-337-3p	NONMMUT046460.2	142	-19.27	142	-19.27	22	2478	2409
mmu-miR-7059-5p	NONMMUT052500.2	146	-19.27	146	-19.27	22	2570	675
mmu-miR-5124a	NONMMUT064235.2	140	-19.26	140	-19.26	20	3151	1005
mmu-miR-3475-5p	NONMMUT046460.2	147	-19.26	147	-19.26	22	2478	1060
mmu-miR-184-5p	NONMMUT064235.2	145	-19.25	145	-19.25	22	3151	818
mmu-miR-6941-5p	NONMMUT052500.2	142	-19.24	142	-19.24	21	2570	350
mmu-miR-692	NONMMUT046460.2	433	-44.72	146	-19.24	21	2478	1986 2373 2166
mmu-miR-9768-5p	NONMMUT052500.2	141	-19.23	141	-19.23	23	2570	1321
mmu-miR-22-3p	NONMMUT046460.2	143	-19.23	143	-19.23	22	2478	513
mmu-miR-3154	NONMMUT052500.2	145	-19.22	145	-19.22	22	2570	1056
mmu-miR-6393	NONMMUT064235.2	140	-19.21	140	-19.21	22	3151	1055
mmu-miR-7677-5p	NONMMUT059456.2	145	-19.21	145	-19.21	25	994	780
mmu-miR-3969	NONMMUT052500.2	150	-19.21	150	-19.21	20	2570	862
mmu-miR-3092-5p	NONMMUT052500.2	459	-51.02	160	-19.21	22	2570	1662 2509 1851
mmu-miR-3097-5p	NONMMUT064235.2	305	-34.83	157	-19.2	23	3151	2335 1731
mmu-miR-7064-5p	NONMMUT052500.2	141	-19.19	141	-19.19	24	2570	60
mmu-miR-6929-3p	NONMMUT046460.2	148	-19.19	148	-19.19	23	2478	2329
mmu-miR-7079-3p	NONMMUT046460.2	149	-19.19	149	-19.19	21	2478	2223
mmu-miR-7024-3p	NONMMUT059456.2	145	-19.18	145	-19.18	23	994	912
mmu-miR-669d-5p	NONMMUT141389.1	147	-19.18	147	-19.18	22	1366	1183
mmu-miR-7652-5p	NONMMUT059456.2	150	-19.18	150	-19.18	22	994	515
mmu-miR-34b-5p	NONMMUT064235.2	441	-49.61	155	-19.18	23	3151	1410 1969 1355
mmu-miR-7003-3p	NONMMUT141389.1	144	-19.17	144	-19.17	19	1366	724
mmu-miR-497b	NONMMUT064235.2	148	-19.16	148	-19.16	24	3151	2095
mmu-miR-7689-5p	NONMMUT059456.2	142	-19.15	142	-19.15	19	994	456
mmu-miR-6935-3p	NONMMUT064235.2	305	-30.13	163	-19.15	20	3151	2537 2261
mmu-miR-466k	NONMMUT049192.2	140	-19.13	140	-19.13	23	1011	973
mmu-miR-1947-5p	NONMMUT049192.2	140	-19.12	140	-19.12	22	1011	398
mmu-miR-7052-5p	NONMMUT141389.1	140	-19.12	140	-19.12	21	1366	563
mmu-let-7a-5p	NONMMUT046460.2	143	-19.12	143	-19.12	22	2478	864
mmu-miR-29a-3p	NONMMUT046460.2	148	-19.12	148	-19.12	22	2478	407
mmu-miR-203b-3p	NONMMUT059456.2	155	-19.12	155	-19.12	22	994	480
mmu-let-7d-5p	NONMMUT046460.2	143	-19.1	143	-19.1	22	2478	864
mmu-let-7e-5p	NONMMUT059456.2	147	-19.1	147	-19.1	22	994	532
mmu-miR-6971-3p	NONMMUT052500.2	142	-19.09	142	-19.09	21	2570	1101
mmu-miR-7687-3p	NONMMUT046460.2	148	-19.09	148	-19.09	21	2478	2416
mmu-miR-208b-5p	NONMMUT141389.1	149	-19.08	149	-19.08	22	1366	999
mmu-miR-12183-5p	NONMMUT064235.2	284	-34.23	143	-19.08	18	3151	869 2796
mmu-miR-7007-5p	NONMMUT064235.2	297	-38.15	154	-19.08	23	3151	1881 956
mmu-miR-6943-5p	NONMMUT052500.2	141	-19.07	141	-19.07	20	2570	908
mmu-miR-187-3p	NONMMUT064235.2	142	-19.07	142	-19.07	22	3151	1646
mmu-miR-466b-3p	NONMMUT052500.2	347	-34.91	180	-19.07	22	2570	2397 2413
mmu-miR-466c-3p	NONMMUT052500.2	347	-34.91	180	-19.07	22	2570	2397 2413
mmu-miR-466p-3p	NONMMUT052500.2	347	-34.91	180	-19.07	22	2570	2397 2413
mmu-miR-7054-5p	NONMMUT064235.2	145	-19.06	145	-19.06	25	3151	1474
mmu-miR-669f-5p	NONMMUT046460.2	142	-19.05	142	-19.05	24	2478	284
mmu-miR-668-3p	NONMMUT052500.2	144	-19.04	144	-19.04	24	2570	528
mmu-miR-134-5p	NONMMUT052500.2	146	-19.04	146	-19.04	22	2570	902
mmu-miR-29c-3p	NONMMUT046460.2	148	-19.04	148	-19.04	22	2478	407
mmu-miR-181c-5p	NONMMUT064235.2	304	-34	154	-19.04	22	3151	1042 333
mmu-miR-686	NONMMUT052500.2	144	-19.03	144	-19.03	22	2570	314
mmu-miR-448-3p	NONMMUT052500.2	146	-19.03	146	-19.03	22	2570	2192
mmu-miR-8094	NONMMUT052500.2	153	-19.03	153	-19.03	21	2570	1573
mmu-miR-342-5p	NONMMUT064235.2	140	-19.02	140	-19.02	22	3151	362
mmu-miR-3083-5p	NONMMUT052500.2	147	-19.02	147	-19.02	22	2570	611
mmu-miR-1902	NONMMUT046460.2	151	-19.02	151	-19.02	22	2478	1921
mmu-miR-5133	NONMMUT064235.2	144	-19.01	144	-19.01	21	3151	1152
mmu-miR-292a-3p	NONMMUT046460.2	283	-31.76	143	-19.01	24	2478	398 710
mmu-miR-6940-3p	NONMMUT064235.2	141	-18.99	141	-18.99	23	3151	91
mmu-miR-466f	NONMMUT049192.2	157	-18.99	157	-18.99	22	1011	977
mmu-miR-6382	NONMMUT052500.2	158	-18.99	158	-18.99	24	2570	2215
mmu-miR-5624-3p	NONMMUT141389.1	310	-33.59	162	-18.99	22	1366	1131 601
mmu-miR-1668	NONMMUT052500.2	147	-18.98	147	-18.98	21	2570	1312
mmu-miR-3966	NONMMUT052500.2	149	-18.98	149	-18.98	21	2570	1426
mmu-miR-6900-3p	NONMMUT141389.1	153	-18.98	153	-18.98	21	1366	1094
mmu-miR-3535	NONMMUT052500.2	159	-18.98	159	-18.98	26	2570	2086
mmu-miR-467g	NONMMUT052500.2	495	-46.09	175	-18.98	21	2570	2399 2413 2195
mmu-miR-3059-5p	NONMMUT064235.2	141	-18.97	141	-18.97	22	3151	617
mmu-miR-1955-5p	NONMMUT064235.2	146	-18.96	146	-18.96	25	3151	2946
mmu-miR-377-5p	NONMMUT064235.2	148	-18.95	148	-18.95	22	3151	2888
mmu-miR-3089-5p	NONMMUT052500.2	151	-18.94	151	-18.94	22	2570	101
mmu-miR-7660-5p	NONMMUT052500.2	154	-18.94	154	-18.94	22	2570	1147
mmu-miR-713	NONMMUT052500.2	141	-18.93	141	-18.93	19	2570	1579
mmu-miR-5623-5p	NONMMUT046460.2	153	-18.93	153	-18.93	24	2478	888
mmu-miR-297b-5p	NONMMUT046460.2	164	-18.93	164	-18.93	22	2478	1159
mmu-miR-292b-3p	NONMMUT049192.2	289	-35.28	145	-18.93	21	1011	299 308
mmu-miR-6936-5p	NONMMUT049192.2	147	-18.92	147	-18.92	21	1011	466
mmu-miR-149-5p	NONMMUT046460.2	161	-18.92	161	-18.92	23	2478	1322
mmu-miR-7673-5p	NONMMUT064235.2	141	-18.9	141	-18.9	22	3151	1857
mmu-miR-5616-3p	NONMMUT141389.1	143	-18.9	143	-18.9	22	1366	1027
mmu-miR-6359	NONMMUT064235.2	301	-35.53	161	-18.89	21	3151	1656 1564
mmu-miR-496a-3p	NONMMUT064235.2	306	-36.9	158	-18.88	22	3151	1503 2845
mmu-miR-669h-3p	NONMMUT052500.2	444	-49.01	159	-18.88	22	2570	2400 2209 2194
mmu-miR-6373	NONMMUT064235.2	143	-18.87	143	-18.87	22	3151	2001
mmu-miR-504-5p	NONMMUT064235.2	146	-18.87	146	-18.87	22	3151	1877
mmu-miR-6995-3p	NONMMUT141389.1	151	-18.86	151	-18.86	21	1366	85
mmu-miR-409-3p	NONMMUT141389.1	143	-18.85	143	-18.85	22	1366	826
mmu-miR-204-3p	NONMMUT141389.1	143	-18.83	143	-18.83	21	1366	561
mmu-miR-873a-5p	NONMMUT052500.2	150	-18.83	150	-18.83	21	2570	1689
mmu-miR-8114	NONMMUT141389.1	150	-18.83	150	-18.83	21	1366	1148
mmu-miR-8112	NONMMUT052500.2	142	-18.82	142	-18.82	20	2570	754
mmu-miR-7662-3p	NONMMUT064235.2	148	-18.81	148	-18.81	24	3151	1816
mmu-miR-201-5p	NONMMUT141389.1	155	-18.81	155	-18.81	22	1366	926
mmu-miR-6338	NONMMUT064235.2	144	-18.79	144	-18.79	21	3151	1627
mmu-miR-105	NONMMUT046460.2	145	-18.79	145	-18.79	23	2478	404
mmu-miR-12194-3p	NONMMUT049192.2	152	-18.78	152	-18.78	22	1011	524
mmu-miR-6344	NONMMUT046460.2	456	-49.09	157	-18.78	22	2478	2210 2249 2180
mmu-miR-18a-5p	NONMMUT046460.2	153	-18.77	153	-18.77	23	2478	1331
mmu-miR-3473a	NONMMUT141389.1	140	-18.76	140	-18.76	18	1366	1323
mmu-miR-719	NONMMUT046460.2	147	-18.76	147	-18.76	22	2478	1656
mmu-miR-8098	NONMMUT049192.2	153	-18.76	153	-18.76	21	1011	592
mmu-miR-3068-3p	NONMMUT141389.1	152	-18.75	152	-18.75	22	1366	718
mmu-miR-1947-3p	NONMMUT064235.2	313	-36.5	161	-18.75	22	3151	2463 65
mmu-miR-7679-5p	NONMMUT141389.1	140	-18.74	140	-18.74	20	1366	65
mmu-miR-12205-5p	NONMMUT046460.2	299	-27.45	153	-18.74	21	2478	2292 2173
mmu-miR-7088-3p	NONMMUT064235.2	304	-33.61	152	-18.74	22	3151	93 2883
mmu-miR-16-5p	NONMMUT059456.2	141	-18.71	141	-18.71	22	994	119
mmu-miR-598-3p	NONMMUT046460.2	141	-18.7	141	-18.7	22	2478	1686
mmu-miR-466n-3p	NONMMUT141389.1	160	-18.69	160	-18.69	22	1366	1176
mmu-miR-3083b-3p	NONMMUT046460.2	286	-31.24	146	-18.69	22	2478	2019 722
mmu-miR-291b-3p	NONMMUT064235.2	156	-18.68	156	-18.68	22	3151	1339
mmu-miR-344g-3p	NONMMUT141389.1	308	-35.58	155	-18.68	22	1366	1213 566
mmu-miR-7030-3p	NONMMUT052500.2	147	-18.67	147	-18.67	21	2570	1148
mmu-miR-7069-3p	NONMMUT064235.2	294	-31.37	150	-18.67	21	3151	74 2359
mmu-miR-1949	NONMMUT046460.2	444	-50.71	162	-18.66	24	2478	1220 2059 2335
mmu-miR-8092	NONMMUT064235.2	140	-18.65	140	-18.65	21	3151	747
mmu-miR-3102-5p	NONMMUT141389.1	143	-18.64	143	-18.64	22	1366	1171
mmu-miR-3076-3p	NONMMUT046460.2	152	-18.64	152	-18.64	23	2478	2426
mmu-miR-7081-3p	NONMMUT064235.2	147	-18.63	147	-18.63	22	3151	602
mmu-miR-6373	NONMMUT046460.2	282	-34.25	142	-18.63	22	2478	220 572
mmu-miR-223-3p	NONMMUT046460.2	285	-33.83	145	-18.63	22	2478	1906 507
mmu-miR-449b	NONMMUT049192.2	140	-18.62	140	-18.62	20	1011	983
mmu-miR-7649-5p	NONMMUT046460.2	143	-18.61	143	-18.61	22	2478	1478
mmu-miR-6971-3p	NONMMUT059456.2	140	-18.58	140	-18.58	21	994	591
mmu-miR-669l-5p	NONMMUT141389.1	143	-18.58	143	-18.58	22	1366	1016
mmu-miR-466j	NONMMUT141389.1	145	-18.58	145	-18.58	23	1366	1179
mmu-miR-713	NONMMUT141389.1	148	-18.58	148	-18.58	19	1366	586
mmu-miR-873a-3p	NONMMUT141389.1	144	-18.57	144	-18.57	21	1366	575
mmu-miR-7027-5p	NONMMUT064235.2	148	-18.56	148	-18.56	23	3151	1481
mmu-miR-669k-3p	NONMMUT052500.2	150	-18.56	150	-18.56	21	2570	2401
mmu-miR-7058-3p	NONMMUT049192.2	140	-18.55	140	-18.55	22	1011	619
mmu-miR-486a-3p	NONMMUT052500.2	141	-18.55	141	-18.55	21	2570	1284
mmu-miR-486b-3p	NONMMUT052500.2	141	-18.55	141	-18.55	20	2570	1285
mmu-miR-28c	NONMMUT059456.2	150	-18.54	150	-18.54	20	994	461
mmu-miR-15b-5p	NONMMUT064235.2	159	-18.54	159	-18.54	22	3151	3027
mmu-miR-291a-3p	NONMMUT064235.2	445	-50.66	155	-18.54	22	3151	2347 2028 2127
mmu-miR-5046	NONMMUT141389.1	146	-18.53	146	-18.53	24	1366	400
mmu-miR-3965	NONMMUT049192.2	149	-18.53	149	-18.53	19	1011	376
mmu-miR-24-3p	NONMMUT046460.2	154	-18.53	154	-18.53	22	2478	1320
mmu-miR-669k-5p	NONMMUT046460.2	161	-18.53	161	-18.53	25	2478	1916
mmu-miR-540-3p	NONMMUT064235.2	284	-35.05	143	-18.53	20	3151	2946 372
mmu-miR-8097	NONMMUT049192.2	147	-18.52	147	-18.52	22	1011	953
mmu-miR-881-5p	NONMMUT059456.2	153	-18.52	153	-18.52	22	994	252
mmu-miR-7065-3p	NONMMUT052500.2	160	-18.52	160	-18.52	21	2570	1620
mmu-miR-337-3p	NONMMUT049192.2	140	-18.51	140	-18.51	22	1011	788
mmu-miR-7667-5p	NONMMUT064235.2	141	-18.51	141	-18.51	22	3151	746
mmu-miR-6388	NONMMUT064235.2	143	-18.51	143	-18.51	21	3151	1657
mmu-miR-1894-3p	NONMMUT059456.2	143	-18.5	143	-18.5	22	994	181
mmu-miR-27b-3p	NONMMUT052500.2	150	-18.5	150	-18.5	21	2570	2529
mmu-miR-3068-5p	NONMMUT064235.2	140	-18.49	140	-18.49	24	3151	2713
mmu-miR-7021-5p	NONMMUT046460.2	140	-18.48	140	-18.48	22	2478	2443
mmu-miR-374c-5p	NONMMUT064235.2	149	-18.48	149	-18.48	20	3151	2144
mmu-miR-7025-3p	NONMMUT046460.2	151	-18.48	151	-18.48	22	2478	488
mmu-miR-7229-3p	NONMMUT059456.2	151	-18.47	151	-18.47	24	994	254
mmu-miR-6983-3p	NONMMUT046460.2	145	-18.46	145	-18.46	23	2478	1234
mmu-miR-301b-5p	NONMMUT064235.2	147	-18.45	147	-18.45	22	3151	628
mmu-miR-6904-3p	NONMMUT064235.2	140	-18.44	140	-18.44	18	3151	2888
mmu-miR-669i	NONMMUT052500.2	143	-18.44	143	-18.44	21	2570	2419
mmu-miR-345-3p	NONMMUT046460.2	145	-18.44	145	-18.44	22	2478	318
mmu-miR-764-5p	NONMMUT049192.2	145	-18.44	145	-18.44	19	1011	588
mmu-miR-466d-5p	NONMMUT049192.2	142	-18.42	142	-18.42	22	1011	976
mmu-miR-7022-3p	NONMMUT049192.2	143	-18.42	143	-18.42	22	1011	743
mmu-miR-148a-3p	NONMMUT046460.2	156	-18.42	156	-18.42	22	2478	684
mmu-miR-1947-3p	NONMMUT141389.1	141	-18.4	141	-18.4	22	1366	985
mmu-miR-871-5p	NONMMUT046460.2	143	-18.4	143	-18.4	23	2478	1377
mmu-miR-1247-3p	NONMMUT049192.2	145	-18.4	145	-18.4	21	1011	624
mmu-miR-12203-3p	NONMMUT064235.2	154	-18.38	154	-18.38	22	3151	1536
mmu-miR-6973b-5p	NONMMUT046460.2	140	-18.37	140	-18.37	24	2478	1471
mmu-miR-7090-5p	NONMMUT064235.2	291	-35.02	146	-18.37	23	3151	1446 312
mmu-miR-468-3p	NONMMUT046460.2	152	-18.36	152	-18.36	23	2478	1996
mmu-miR-100-3p	NONMMUT141389.1	155	-18.36	155	-18.36	22	1366	1033
mmu-miR-6898-3p	NONMMUT059456.2	146	-18.35	146	-18.35	21	994	343
mmu-miR-290a-5p	NONMMUT052500.2	156	-18.35	156	-18.35	22	2570	1165
mmu-miR-6948-3p	NONMMUT049192.2	141	-18.34	141	-18.34	21	1011	770
mmu-miR-3084-3p	NONMMUT064235.2	296	-34.52	151	-18.34	21	3151	1161 1255
mmu-miR-181a-2-3p	NONMMUT141389.1	142	-18.33	142	-18.33	22	1366	583
mmu-miR-466h-5p	NONMMUT141389.1	288	-35.47	144	-18.33	22	1366	875 1180
mmu-miR-3097-3p	NONMMUT052500.2	141	-18.32	141	-18.32	22	2570	1164
mmu-miR-18b-5p	NONMMUT046460.2	153	-18.32	153	-18.32	23	2478	1331
mmu-miR-5615-3p	NONMMUT059456.2	302	-36.47	158	-18.32	22	994	603 240
mmu-miR-6985-3p	NONMMUT046460.2	140	-18.31	140	-18.31	21	2478	2152
mmu-miR-184-5p	NONMMUT052500.2	141	-18.31	141	-18.31	22	2570	1352
mmu-miR-3065-3p	NONMMUT064235.2	306	-36.14	155	-18.31	23	3151	533 827
mmu-miR-15a-3p	NONMMUT052500.2	154	-18.3	154	-18.3	22	2570	2427
mmu-miR-20b-3p	NONMMUT059456.2	150	-18.29	150	-18.29	22	994	728
mmu-miR-7060-5p	NONMMUT064235.2	298	-32.85	158	-18.29	22	3151	1852 2129
mmu-miR-7665-5p	NONMMUT059456.2	145	-18.28	145	-18.28	23	994	968
mmu-miR-186-3p	NONMMUT141389.1	149	-18.28	149	-18.28	22	1366	604
mmu-miR-6925-5p	NONMMUT141389.1	149	-18.28	149	-18.28	22	1366	1287
mmu-miR-6540-3p	NONMMUT064235.2	293	-33.62	149	-18.28	21	3151	2191 945
mmu-miR-101a-3p	NONMMUT064235.2	141	-18.27	141	-18.27	21	3151	830
mmu-miR-717	NONMMUT064235.2	144	-18.27	144	-18.27	22	3151	10
mmu-miR-665-3p	NONMMUT052500.2	140	-18.24	140	-18.24	20	2570	2220
mmu-miR-6999-5p	NONMMUT052500.2	148	-18.24	148	-18.24	23	2570	299
mmu-miR-6715-3p	NONMMUT052500.2	154	-18.24	154	-18.24	21	2570	1165
mmu-miR-6985-3p	NONMMUT052500.2	140	-18.23	140	-18.23	21	2570	2283
mmu-miR-6379	NONMMUT064235.2	146	-18.23	146	-18.23	22	3151	756
mmu-miR-1901	NONMMUT064235.2	151	-18.23	151	-18.23	22	3151	294
mmu-miR-191-3p	NONMMUT046460.2	147	-18.22	147	-18.22	22	2478	369
mmu-miR-207	NONMMUT046460.2	294	-32.93	149	-18.22	23	2478	1494 1091
mmu-miR-27b-5p	NONMMUT059456.2	141	-18.21	141	-18.21	22	994	457
mmu-miR-1b-3p	NONMMUT141389.1	292	-33.75	151	-18.21	23	1366	1165 1084
mmu-miR-7030-3p	NONMMUT064235.2	292	-29.67	149	-18.21	21	3151	1318 1202
mmu-miR-6419	NONMMUT064235.2	140	-18.2	140	-18.2	22	3151	3029
mmu-miR-467a-5p	NONMMUT046460.2	296	-34.01	150	-18.2	22	2478	709 400
mmu-miR-7064-3p	NONMMUT052500.2	146	-18.19	146	-18.19	21	2570	967
mmu-miR-7231-3p	NONMMUT064235.2	743	-69.56	154	-18.18	23	3151	1324 1509 1610 1200 2535
mmu-miR-301a-5p	NONMMUT046460.2	140	-18.17	140	-18.17	22	2478	2225
mmu-miR-669l-3p	NONMMUT052500.2	303	-33.7	156	-18.16	22	2570	2399 2413
mmu-miR-6939-5p	NONMMUT059456.2	145	-18.15	145	-18.15	21	994	514
mmu-miR-504-5p	NONMMUT059456.2	147	-18.15	147	-18.15	22	994	248
mmu-miR-3966	NONMMUT046460.2	158	-18.15	158	-18.15	21	2478	515
mmu-miR-744-3p	NONMMUT052500.2	141	-18.14	141	-18.14	22	2570	1150
mmu-miR-7119-5p	NONMMUT052500.2	149	-18.14	149	-18.14	21	2570	348
mmu-miR-206-3p	NONMMUT141389.1	150	-18.14	150	-18.14	22	1366	1242
mmu-miR-7039-5p	NONMMUT052500.2	154	-18.14	154	-18.14	22	2570	34
mmu-miR-669h-5p	NONMMUT064235.2	297	-35.37	152	-18.14	24	3151	987 3018
mmu-miR-686	NONMMUT064235.2	436	-41.61	151	-18.13	22	3151	1611 1508 1326
mmu-miR-379-5p	NONMMUT064235.2	142	-18.1	142	-18.1	21	3151	3065
mmu-miR-3062-3p	NONMMUT064235.2	145	-18.1	145	-18.1	19	3151	191
mmu-miR-1298-3p	NONMMUT049192.2	146	-18.1	146	-18.1	22	1011	628
mmu-miR-12196-5p	NONMMUT046460.2	142	-18.08	142	-18.08	23	2478	1497
mmu-miR-878-3p	NONMMUT064235.2	420	-41.54	140	-18.08	22	3151	1736 2040 2066
mmu-miR-7237-5p	NONMMUT046460.2	140	-18.07	140	-18.07	24	2478	2122
mmu-miR-6240	NONMMUT046460.2	152	-18.07	152	-18.07	26	2478	1742
mmu-miR-6902-3p	NONMMUT064235.2	299	-35.13	150	-18.07	21	3151	1584 95
mmu-miR-187-3p	NONMMUT052500.2	153	-18.06	153	-18.06	22	2570	227
mmu-miR-466k	NONMMUT141389.1	142	-18.05	142	-18.05	23	1366	1014
mmu-miR-6897-3p	NONMMUT141389.1	142	-18.05	142	-18.05	21	1366	918
mmu-miR-202-3p	NONMMUT046460.2	147	-18.05	147	-18.05	22	2478	69
mmu-miR-181d-3p	NONMMUT052500.2	140	-18.04	140	-18.04	21	2570	311
mmu-miR-7036b-3p	NONMMUT064235.2	143	-18.04	143	-18.04	22	3151	1299
mmu-miR-882	NONMMUT059456.2	141	-18.03	141	-18.03	22	994	769
mmu-miR-7021-5p	NONMMUT064235.2	141	-18.03	141	-18.03	22	3151	3108
mmu-miR-30b-3p	NONMMUT064235.2	147	-18.03	147	-18.03	22	3151	1925
mmu-miR-7043-5p	NONMMUT052500.2	150	-18.03	150	-18.03	23	2570	852
mmu-miR-107-5p	NONMMUT064235.2	440	-41.68	150	-18.03	23	3151	1607 1487 1386
mmu-miR-7070-3p	NONMMUT064235.2	140	-18.02	140	-18.02	20	3151	2667
mmu-miR-6715-5p	NONMMUT052500.2	143	-18.02	143	-18.02	23	2570	87
mmu-let-7d-5p	NONMMUT059456.2	151	-18.01	151	-18.01	22	994	532
mmu-miR-432	NONMMUT052500.2	282	-34.22	141	-18.01	23	2570	1671 2094
mmu-miR-7237-5p	NONMMUT052500.2	140	-18	140	-18	24	2570	991
mmu-miR-6391	NONMMUT052500.2	141	-18	141	-18	21	2570	93
mmu-miR-183-5p	NONMMUT064235.2	287	-33.11	145	-18	22	3151	2894 348
mmu-miR-7093-3p	NONMMUT141389.1	292	-33.61	147	-18	21	1366	794 234
mmu-miR-3112-5p	NONMMUT064235.2	142	-17.99	142	-17.99	21	3151	1980
mmu-miR-467d-3p	NONMMUT052500.2	155	-17.99	155	-17.99	22	2570	2401
mmu-miR-125b-1-3p	NONMMUT064235.2	143	-17.98	143	-17.98	22	3151	3120
mmu-miR-302c-3p	NONMMUT064235.2	294	-30.98	154	-17.98	22	3151	2347 1849
mmu-miR-7226-5p	NONMMUT052500.2	140	-17.94	140	-17.94	26	2570	2216
mmu-miR-7651-5p	NONMMUT052500.2	140	-17.94	140	-17.94	22	2570	2456
mmu-miR-7050-3p	NONMMUT046460.2	157	-17.94	157	-17.94	21	2478	2413
mmu-miR-6929-3p	NONMMUT064235.2	283	-33.97	142	-17.94	23	3151	82 2938
mmu-miR-29a-5p	NONMMUT046460.2	293	-29.96	150	-17.94	22	2478	2185 2405
mmu-miR-411-5p	NONMMUT141389.1	160	-17.93	160	-17.93	21	1366	250
mmu-miR-7680-5p	NONMMUT064235.2	141	-17.92	141	-17.92	20	3151	1179
mmu-miR-1947-5p	NONMMUT141389.1	148	-17.92	148	-17.92	22	1366	693
mmu-miR-7664-5p	NONMMUT141389.1	162	-17.92	162	-17.92	21	1366	870
mmu-miR-6395	NONMMUT064235.2	143	-17.91	143	-17.91	22	3151	2446
mmu-miR-328-3p	NONMMUT064235.2	144	-17.91	144	-17.91	22	3151	2446
mmu-let-7k	NONMMUT059456.2	144	-17.91	144	-17.91	19	994	536
mmu-miR-7646-5p	NONMMUT141389.1	153	-17.91	153	-17.91	22	1366	856
mmu-miR-8093	NONMMUT141389.1	145	-17.9	145	-17.9	21	1366	513
mmu-miR-351-3p	NONMMUT064235.2	154	-17.89	154	-17.89	21	3151	453
mmu-miR-544-3p	NONMMUT064235.2	291	-30.82	146	-17.89	22	3151	54 890
mmu-miR-7668-5p	NONMMUT141389.1	143	-17.88	143	-17.88	24	1366	1209
mmu-miR-20a-3p	NONMMUT046460.2	142	-17.87	142	-17.87	22	2478	369
mmu-miR-92a-1-5p	NONMMUT046460.2	143	-17.86	143	-17.86	23	2478	523
mmu-miR-701-3p	NONMMUT049192.2	141	-17.85	141	-17.85	20	1011	737
mmu-miR-3103-5p	NONMMUT064235.2	149	-17.85	149	-17.85	21	3151	1105
mmu-miR-6403	NONMMUT059456.2	296	-31.09	151	-17.84	22	994	721 518
mmu-miR-1938	NONMMUT064235.2	142	-17.81	142	-17.81	22	3151	1928
mmu-miR-3087-5p	NONMMUT141389.1	144	-17.81	144	-17.81	21	1366	579
mmu-miR-130a-5p	NONMMUT046460.2	448	-45.45	160	-17.8	22	2478	2165 1453 1088
mmu-miR-6903-3p	NONMMUT052500.2	140	-17.79	140	-17.79	20	2570	227
mmu-miR-138-5p	NONMMUT046460.2	150	-17.79	150	-17.79	23	2478	1265
mmu-miR-7070-3p	NONMMUT049192.2	157	-17.79	157	-17.79	20	1011	574
mmu-miR-471-3p	NONMMUT052500.2	144	-17.77	144	-17.77	22	2570	2439
mmu-miR-684	NONMMUT064235.2	140	-17.76	140	-17.76	19	3151	623
mmu-miR-802-5p	NONMMUT052500.2	149	-17.76	149	-17.76	22	2570	2284
mmu-miR-3569-3p	NONMMUT064235.2	289	-34.19	145	-17.76	22	3151	1163 2405
mmu-miR-6335	NONMMUT064235.2	149	-17.75	149	-17.75	22	3151	2863
mmu-miR-329-3p	NONMMUT052500.2	154	-17.74	154	-17.74	22	2570	980
mmu-miR-1843a-5p	NONMMUT059456.2	141	-17.73	141	-17.73	21	994	709
mmu-miR-6992-5p	NONMMUT141389.1	145	-17.73	145	-17.73	23	1366	917
mmu-miR-139-5p	NONMMUT064235.2	154	-17.73	154	-17.73	22	3151	1342
mmu-miR-6942-5p	NONMMUT059456.2	145	-17.72	145	-17.72	21	994	893
mmu-miR-1897-5p	NONMMUT046460.2	146	-17.71	146	-17.71	22	2478	240
mmu-miR-5624-3p	NONMMUT046460.2	158	-17.71	158	-17.71	22	2478	888
mmu-miR-302d-3p	NONMMUT052500.2	141	-17.7	141	-17.7	23	2570	1365
mmu-miR-297a-5p	NONMMUT046460.2	446	-50.43	164	-17.7	22	2478	1159 1222 284
mmu-miR-1199-5p	NONMMUT049192.2	154	-17.69	154	-17.69	20	1011	801
mmu-miR-152-3p	NONMMUT064235.2	287	-33.23	144	-17.69	21	3151	231 1341
mmu-miR-6910-3p	NONMMUT046460.2	287	-30.53	146	-17.69	22	2478	126 1107
mmu-miR-6933-3p	NONMMUT046460.2	156	-17.68	156	-17.68	20	2478	2174
mmu-miR-3101-3p	NONMMUT059456.2	141	-17.67	141	-17.67	21	994	647
mmu-miR-7024-3p	NONMMUT052500.2	142	-17.67	142	-17.67	23	2570	1728
mmu-miR-384-5p	NONMMUT052500.2	146	-17.66	146	-17.66	23	2570	2023
mmu-miR-551b-5p	NONMMUT046460.2	149	-17.65	149	-17.65	23	2478	1430
mmu-miR-16-5p	NONMMUT064235.2	157	-17.65	157	-17.65	22	3151	3031
mmu-miR-7649-5p	NONMMUT052500.2	146	-17.64	146	-17.64	22	2570	1733
mmu-miR-139-5p	NONMMUT049192.2	150	-17.64	150	-17.64	22	1011	934
mmu-miR-6993-5p	NONMMUT052500.2	281	-33.79	141	-17.63	23	2570	1867 105
mmu-miR-330-3p	NONMMUT059456.2	140	-17.62	140	-17.62	23	994	833
mmu-miR-5114	NONMMUT059456.2	145	-17.62	145	-17.62	22	994	774
mmu-miR-669f-3p	NONMMUT046460.2	146	-17.62	146	-17.62	23	2478	1155
mmu-miR-34a-3p	NONMMUT046460.2	303	-34.26	153	-17.62	21	2478	489 408
mmu-miR-8098	NONMMUT046460.2	142	-17.61	142	-17.61	21	2478	1839
mmu-miR-450b-3p	NONMMUT049192.2	144	-17.59	144	-17.59	22	1011	625
mmu-miR-759	NONMMUT141389.1	145	-17.59	145	-17.59	22	1366	845
mmu-miR-302a-3p	NONMMUT052500.2	140	-17.58	140	-17.58	23	2570	1365
mmu-miR-3101-5p	NONMMUT046460.2	156	-17.58	156	-17.58	21	2478	2125
mmu-miR-669d-2-3p	NONMMUT052500.2	303	-33.55	156	-17.58	22	2570	2399 2413
mmu-miR-34a-5p	NONMMUT141389.1	140	-17.57	140	-17.57	22	1366	117
mmu-miR-3069-5p	NONMMUT064235.2	151	-17.57	151	-17.57	24	3151	1678
mmu-miR-5114	NONMMUT064235.2	151	-17.57	151	-17.57	22	3151	503
mmu-miR-7214-5p	NONMMUT052500.2	163	-17.57	163	-17.57	23	2570	1617
mmu-miR-5129-3p	NONMMUT141389.1	142	-17.56	142	-17.56	22	1366	950
mmu-miR-669b-5p	NONMMUT046460.2	143	-17.56	143	-17.56	22	2478	22
mmu-miR-7684-5p	NONMMUT064235.2	150	-17.56	150	-17.56	21	3151	2004
mmu-miR-1192	NONMMUT059456.2	173	-17.56	173	-17.56	22	994	835
mmu-miR-1306-3p	NONMMUT059456.2	141	-17.55	141	-17.55	21	994	40
mmu-miR-503-5p	NONMMUT052500.2	145	-17.55	145	-17.55	23	2570	1182
mmu-miR-7019-3p	NONMMUT141389.1	141	-17.54	141	-17.54	23	1366	832
mmu-miR-5623-3p	NONMMUT064235.2	144	-17.54	144	-17.54	22	3151	2403
mmu-miR-6927-3p	NONMMUT064235.2	145	-17.54	145	-17.54	21	3151	3050
mmu-miR-411-3p	NONMMUT064235.2	158	-17.54	158	-17.54	22	3151	2413
mmu-miR-465c-5p	NONMMUT046460.2	289	-25.89	145	-17.54	22	2478	1198 1697
mmu-miR-6957-3p	NONMMUT064235.2	149	-17.53	149	-17.53	22	3151	315
mmu-miR-1892	NONMMUT064235.2	144	-17.52	144	-17.52	22	3151	278
mmu-miR-6355	NONMMUT064235.2	148	-17.52	148	-17.52	21	3151	1441
mmu-miR-7212-3p	NONMMUT046460.2	150	-17.52	150	-17.52	21	2478	1147
mmu-miR-7052-3p	NONMMUT064235.2	439	-47.26	152	-17.52	21	3151	2360 76 1256
mmu-miR-467g	NONMMUT046460.2	141	-17.51	141	-17.51	21	2478	1155
mmu-miR-7688-5p	NONMMUT052500.2	140	-17.5	140	-17.5	23	2570	45
mmu-miR-6345	NONMMUT046460.2	143	-17.5	143	-17.5	21	2478	428
mmu-miR-19b-2-5p	NONMMUT052500.2	155	-17.5	155	-17.5	24	2570	2538
mmu-miR-491-5p	NONMMUT052500.2	140	-17.48	140	-17.48	22	2570	37
mmu-miR-497a-5p	NONMMUT059456.2	143	-17.48	143	-17.48	22	994	119
mmu-miR-6516-3p	NONMMUT046460.2	148	-17.48	148	-17.48	22	2478	1163
mmu-miR-8095	NONMMUT046460.2	140	-17.46	140	-17.46	22	2478	522
mmu-miR-33-3p	NONMMUT049192.2	140	-17.45	140	-17.45	22	1011	620
mmu-miR-7679-3p	NONMMUT052500.2	140	-17.45	140	-17.45	24	2570	2242
mmu-miR-217-5p	NONMMUT046460.2	428	-45.83	145	-17.45	23	2478	1932 369 2396
mmu-miR-378a-5p	NONMMUT046460.2	145	-17.43	145	-17.43	22	2478	1525
mmu-miR-144-3p	NONMMUT046460.2	154	-17.43	154	-17.43	20	2478	1482
mmu-miR-28b	NONMMUT064235.2	148	-17.42	148	-17.42	21	3151	896
[truncated: 939 more rows]
